# Supplementary material for: Triflic anhydride mediated synthesis of 3,4-dihydroquinazolines: a three-component one-pot tandem procedure
Source: Royal Society of Chemistry journal article supplement (doi:10.1039/c9ob01596e), 2019-01-01

## *Supplementary Information*

### **Triflic Anhydride Mediated Synthesis of 3,4-Dihydroquinazolines: A Three-Component One-Pot Tandem Procedure**

Christina L. Magyar, Tyler J. Wall, Steven B. Davies, Molly V. Campbell,  
Haven A. Barna, Sydney R. Smith, Christopher J. Savich, and R. Adam Mosey\*

Department of Chemistry, Lake Superior State University, Sault Sainte Marie, MI 49783

\*rmosey@lssu.edu

| <u>Contents</u>                  | <u>Page #</u> |
|----------------------------------|---------------|
| General Experimental Information | S1            |
| Experimental Procedures          | S2            |
| X-Ray Crystal Data for <b>2</b>  | S17           |
| References and Notes             | S25           |
| NMR Spectra                      | S26           |

#### **General Experimental Information.**

Reactions were carried out in flame-dried glassware under nitrogen atmosphere. All reactions were magnetically stirred and monitored by TLC on EMD Millipore silica gel 60F<sub>254</sub> pre-coated glass plates using UV light (254 nm) to visualize the compounds. Column chromatography was carried out on SiliaFlash P60 (230 – 400 mesh) silica gel supplied by SiliCycle. Infrared spectra were recorded on an Agilent Technologies Cary 630 FT-IR spectrometer. Proton (<sup>1</sup>H NMR) and carbon (<sup>13</sup>C NMR) nuclear magnetic resonance spectra were recorded on a Bruker Avance III 400 MHz spectrometer. The chemical shifts are given in parts per million (ppm) on the delta (δ) scale. Tetramethylsilane (TMS) or the residual solvent peak was used as a reference value. High resolution mass spectra were recorded at the Lumigen Instrument Center of Wayne State University on a Waters LCT Premium XE TOF mass spectrometer. Elemental analyses were performed by Robertson Microlit Laboratories using a Perkin-Elmer Model 2400 CHN Analyzer. Melting points were obtained using a Mel-Temp capillary melting point apparatus and are uncorrected. CH<sub>2</sub>Cl<sub>2</sub> was distilled under N<sub>2</sub> from CaH<sub>2</sub> and 2-chloropyridine was dried over 4 Å molecular sieves; all other solvents and chemicals were purchased from commercial vendors and were used without additional purification.

**General procedure A for amide synthesis.** To a mixture of an amine and triethylamine (TEA) in anhydrous CH<sub>2</sub>Cl<sub>2</sub>, cooled to 0 °C in an ice bath, was added dropwise an appropriate acid chloride followed by 4-DMAP. The ice bath was removed, and the reaction stirred at rt under N<sub>2</sub> atmosphere until complete, as determined by TLC. The reaction mixture was washed with saturated NaHCO<sub>3</sub> solution (x3) and brine before being dried (Na<sub>2</sub>SO<sub>4</sub>) and concentrated. The crude product was then purified either by crystallization or silica gel chromatography. This general procedure was used for the synthesis of compounds **1**, **3a**, **3c**, **3e-3h**, **3j-3k**, and **3m-3n**.

**General procedure B for amide synthesis.** To a mixture of an amine in pyridine, cooled to 0 °C in an ice bath, was dropwise added a solution of acid chloride in THF. The ice bath was removed, and the reaction stirred under N<sub>2</sub> atmosphere until complete, as determined by TLC. The reaction was poured over ice water and the resultant precipitate was collected by vacuum filtration and washed with ice water. The filtered solid was then purified by crystallization. This general procedure was used for the synthesis of compounds **3b**, **3d**, **3l**, and **3o-3q**.

**General procedure for 3,4-dihydroquinazoline synthesis:** A mixture of amide (1.0 mmol), amine (1.1 mmol), aldehyde (1.1 mmol), and 4 Å molecular sieves (~1 g) in CH<sub>2</sub>Cl<sub>2</sub> (10.0 mL) was prepared and stirred for 18 h at room temperature under N<sub>2</sub> atmosphere. The reaction mixture was cooled to -41 °C and was treated successively with 2-chloropyridine (1.2 mmol) followed by Tf<sub>2</sub>O (1.1 mmol). The reaction was then allowed to warm to room temperature and was stirred for the indicated time. The molecular sieves were then filtered from the reaction, and the filtrate was washed with saturated aqueous NaHCO<sub>3</sub> solution before being dried (Na<sub>2</sub>SO<sub>4</sub>) and concentrated. The crude mixture was then purified via flash chromatography.

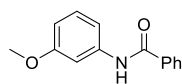

**N-(3-methoxyphenyl)benzamide (1).** Prepared according to general procedure A for amide synthesis using *m*-anisidine (5.60 mL, 49.8 mmol), TEA (8.40 mL, 60.3 mmol), benzoyl chloride (7.75 mL, 66.8 mmol), 4-DMAP (0.063 g, 0.51 mmol), and CH<sub>2</sub>Cl<sub>2</sub> (250 mL). The reaction stirred for 18 h before being worked up as described. The residual solid was purified by recrystallization from EtOAc and hexanes to afford the desired product (10.766 g, 99% yield) of the title compound as a solid (m.p. = 112 - 113 °C). <sup>1</sup>H NMR (400 MHz, CDCl<sub>3</sub>) δ 7.90 (s, 1H), 7.87 - 7.83 (m, 2H), 7.56 - 7.51 (m, 1H), 7.50 - 7.39 (m, 3H), 7.24 (t, *J* = 8.1 Hz, 1H), 7.10 (ddd, *J* = 7.9, 2.0, 0.9 Hz, 1H), 6.70 (ddd, *J* = 8.3, 2.5, 0.9 Hz, 1H), 3.81 (s, 3H). <sup>13</sup>C NMR (101 MHz, CDCl<sub>3</sub>) δ 165.8, 160.2, 139.2, 135.0, 131.8, 129.7, 128.8, 127.0, 112.3, 110.6, 105.8, 55.3. The NMR spectral data are consistent with those reported in the literature.<sup>1</sup>

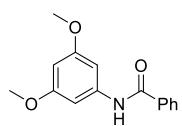

**N-(3,5-dimethoxyphenyl)benzamide (3a).** Prepared according to general procedure A for amide synthesis using 3,5-dimethoxyaniline (1.560 g, 9.90 mmol), TEA (1.50 mL, 10.6 mmol), benzoyl chloride (1.25 mL, 10.7 mmol), 4-DMAP (0.012 g, 0.10 mmol), and EtOAc (50 mL) instead of CH<sub>2</sub>Cl<sub>2</sub>. The reaction stirred for 18 h before being worked up as described. The residual solid was purified by recrystallization from EtOAc and hexanes to afford the desired product (2.107 g, 83% yield) as a solid (m.p. = 142 - 145 °C). <sup>1</sup>H NMR (400 MHz, DMSO-d<sub>6</sub>) δ 10.17 (s, 1H), 7.99 - 7.92 (m, 2H), 7.63 - 7.50 (m, 3H), 7.11 (d, *J* = 2.3 Hz, 2H), 6.28 (t, *J* = 2.3 Hz, 1H), 3.75 (s, 6H). <sup>13</sup>C NMR (101 MHz, DMSO-d<sub>6</sub>) δ 165.6, 160.4, 140.9, 134.9, 131.6, 128.4, 127.6, 98.5, 95.7, 55.1. The NMR spectral data are consistent with those reported in the literature.<sup>2</sup>

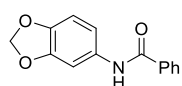

**N-1,3-benzodioxol-5-ylbenzamide (3b).** Prepared according to general procedure B for amide synthesis using 3,4-methylenedioxyaniline (2.740 g, 20.0 mmol), pyridine (25 mL, 310 mmol), benzoyl chloride (2.32 mL, 20.0 mmol), and THF (4.0 mL). The reaction stirred for 1 h before being worked up as described. The residual solid was purified by recrystallization from EtOAc and hexanes to afford the desired product (2.842 g, 59% yield) as a brown solid (m.p. = 137 - 140 °C). <sup>1</sup>H NMR (400 MHz, CDCl<sub>3</sub>) δ 7.99 (s, 1H), 7.82 (d, *J* = 7.4 Hz, 2H), 7.50

(t,  $J = 7.4$  Hz, 1H), 7.42 (t,  $J = 7.5$  Hz, 2H), 7.31 (d,  $J = 2.1$  Hz, 1H), 6.90 (dd,  $J = 8.4, 2.1$  Hz, 1H), 6.73 (d,  $J = 8.3$  Hz, 1H), 5.94 (s, 2H).  $^{13}\text{C}$  NMR (101 MHz,  $\text{CDCl}_3$ )  $\delta$  165.8, 147.8, 144.5, 134.8, 132.2, 131.7, 128.7, 127.0, 113.8, 108.1, 103.3, 101.3. The NMR spectral data are consistent with those reported in the literature.<sup>3</sup>

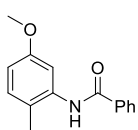

***N*-(5-methoxy-2-methylphenyl)benzamide (3c).** Prepared according to general procedure A for amide synthesis using 5-methoxy-2-methylaniline (0.954 g, 6.95 mmol), TEA (1.20 mL, 8.6 mmol), benzoyl chloride (0.89 mL, 7.7 mmol), 4-DMAP (0.012 g, 0.10 mmol), and  $\text{CH}_2\text{Cl}_2$  (30 mL). The reaction stirred for 18 h before being worked up as described. The residual solid was purified by recrystallization from EtOAc and hexanes to afford the desired product (1.158 g, 69% yield) as a solid (m.p. = 126 – 129 °C).  $^1\text{H}$  NMR (400 MHz,  $\text{CDCl}_3$ )  $\delta$  7.98 (s, 1H), 7.85 – 7.78 (m, 2H), 7.55 – 7.44 (m, 2H), 7.38 (t,  $J = 7.5$  Hz, 2H), 7.03 (d,  $J = 8.8$  Hz, 1H), 6.63 (dd,  $J = 8.4, 2.7$  Hz, 1H), 3.70 (s, 3H), 2.16 (s, 3H).  $^{13}\text{C}$  NMR (101 MHz,  $\text{CDCl}_3$ )  $\delta$  165.7, 158.2, 136.5, 134.8, 131.7, 130.9, 128.7, 127.1, 121.5, 111.4, 108.6, 55.3, 16.9. The NMR spectral data are consistent with those reported in the literature.<sup>4</sup>

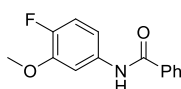

***N*-(4-fluoro-3-methoxyphenyl)benzamide (3d).** Prepared according to general procedure B for amide synthesis using *m*-anisidine (1.413 g, 10.0 mmol), pyridine (25 mL), benzoyl chloride (1.16 mL, 9.99 mmol), and THF (4 mL). The reaction stirred for 1.5 h before being worked up as described. The residual solid was purified by recrystallization in EtOAc and hexanes to afford the desired product (1.897 g, 77% yield) as a solid (m.p. = 133 – 135 °C).  $^1\text{H}$  NMR (400 MHz,  $\text{CDCl}_3$ )  $\delta$  7.90 (s, 1H), 7.85 (d,  $J = 7.2$  Hz, 2H), 7.64 (dd,  $J = 7.7, 2.5$  Hz, 1H), 7.55 (t,  $J = 7.4$  Hz, 1H), 7.47 (t,  $J = 7.4$  Hz, 2H), 7.03 (dd,  $J = 10.9, 8.7$  Hz, 1H), 6.90 (ddd,  $J = 8.7, 3.8, 2.6$  Hz, 1H), 3.89 (s, 3H);  $^{13}\text{C}$  NMR (101 MHz,  $\text{CDCl}_3$ )  $\delta$  165.8, 149.3 (d,  $^1J_{\text{C-F}} = 243$  Hz), 147.8 (d,  $^2J_{\text{C-F}} = 11$  Hz), 134.7, 134.4 (d,  $^4J_{\text{C-F}} = 3$  Hz), 132.0, 128.8, 127.0, 115.9 (d,  $^2J_{\text{C-F}} = 19$  Hz), 112.0 (d,  $^3J_{\text{C-F}} = 7$  Hz), 106.5 (d,  $^3J_{\text{C-F}} = 2$  Hz), 56.3; IR (neat): 3297, 3048, 2985, 1649, 1620, 1515, 1280, 1215  $\text{cm}^{-1}$ ; Anal. Calcd for  $\text{C}_{14}\text{H}_{12}\text{FNO}_2$ : C, 68.56%; H, 4.93%; N, 5.71%; Found: C, 68.36%; H, 4.92%; N, 5.73%.

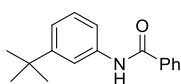

***N*-(3-tert-butylphenyl)benzamide (3e).** Prepared according to general procedure A for amide synthesis using 3-tert-butylaniline (0.749 g, 5.02 mmol), TEA (0.84 mL, 6.0 mmol), benzoyl chloride (0.64 mL, 5.5 mmol), 4-DMAP (0.012 g, 0.10 mmol), and  $\text{CH}_2\text{Cl}_2$  (25 mL). The reaction stirred for 18 h before being worked up as described. The residual solid was purified by recrystallization from benzene and pentane to afford the desired product (0.879 g, 65% yield) as a solid (m.p. = 115 – 118 °C).  $^1\text{H}$  NMR (400 MHz,  $\text{CDCl}_3$ )  $\delta$  8.19 (s, 1H), 7.88 – 7.80 (m, 2H), 7.64 (t,  $J = 2.0$  Hz, 1H), 7.55 – 7.44 (m, 2H), 7.39 (t,  $J = 7.5$  Hz, 2H), 7.25 (t,  $J = 8.0$  Hz, 1H), 7.16 (ddd,  $J = 7.9, 1.9, 1.1$  Hz, 1H), 1.30 (s, 9H).  $^{13}\text{C}$  NMR (101 MHz,  $\text{CDCl}_3$ )  $\delta$  165.8, 152.3, 137.7, 135.1, 131.7, 128.7, 127.0, 121.7, 117.6, 117.5, 34.8, 31.3. The NMR spectral data are consistent with those reported in the literature.<sup>5</sup>

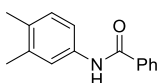

***N*-(3,4-dimethylphenyl)benzamide (3f).** Prepared according to general procedure A for amide synthesis using 3,4-dimethylaniline (0.617 g, 5.09 mmol), TEA (0.83 mL, 6.0 mmol), benzoyl chloride (0.64 mL, 5.5 mmol), 4-DMAP (0.012 g, 0.10 mmol), and  $\text{CH}_2\text{Cl}_2$  (25 mL). The reaction stirred for 18 h before being worked up as described. The residual solid was purified by recrystallization from EtOAc and hexanes to afford the desired product (0.952 g, 83% yield) as a solid (m.p. = 142 – 144 °C).  $^1\text{H}$  NMR (400 MHz,  $\text{CDCl}_3$ )  $\delta$  7.90 – 7.82 (m, 2H), 7.72 (s, 1H), 7.58 – 7.42 (m, 4H), 7.35 (dd,  $J = 8.1, 2.4$  Hz, 1H), 7.12 (d,  $J = 8.1$  Hz, 1H), 2.27 (s, 3H), 2.25 (s, 3H).  $^{13}\text{C}$  NMR (101 MHz,  $\text{CDCl}_3$ )  $\delta$  165.7, 137.2, 135.7, 135.1, 132.9, 131.6, 130.0, 128.7, 127.0, 121.7, 117.9, 19.9, 19.2. The NMR spectral data are consistent with those reported in the literature.<sup>6</sup>

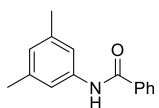

***N*-(3,5-dimethylphenyl)benzamide (3g).** Prepared according to general procedure A for amide synthesis using 3,5-dimethylaniline (2.50 mL, 20.1 mmol), TEA (3.35 mL, 24.0 mmol), benzoyl chloride (2.55 mL, 21.9 mmol), 4-DMAP (0.024 g, 0.20 mmol), and  $\text{CH}_2\text{Cl}_2$  (100 mL). The reaction stirred for 18 h before being worked up as described. The residual solid was purified by recrystallization from EtOAc and hexanes to afford the desired

product (3.751 g, 83% yield) as a white solid (m.p. = 142 - 144 °C).  $^1\text{H}$  NMR (400 MHz,  $\text{CDCl}_3$ )  $\delta$  7.96 (s, 1H), 7.83 (d,  $J$  = 7.2 Hz, 2H), 7.49 (t,  $J$  = 7.4 Hz, 1H), 7.41 (t,  $J$  = 7.5 Hz, 2H), 7.27 (s, 2H), 6.76 (s, 1H), 2.27 (s, 6H).  $^{13}\text{C}$  NMR (101 MHz,  $\text{CDCl}_3$ )  $\delta$  165.8, 138.7, 137.8, 135.1, 131.6, 128.7, 127.0, 126.3, 118.1, 21.3. The NMR spectral data are consistent with those reported in the literature.<sup>7</sup>

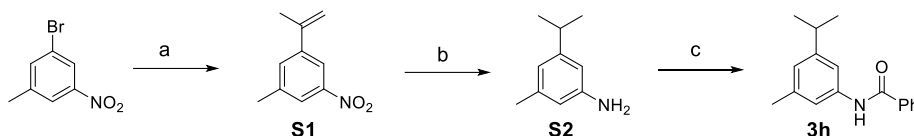

Reagents and conditions

a) 4,4,5,5-tetramethyl-2-(prop-1-en-2-yl)-1,3,2-dioxaborolane,  $\text{Pd}(\text{PPh}_3)_4$ ,  $\text{NaHCO}_3$ , water, dioxane, 100 °C. b)  $\text{H}_2$ , 10%  $\text{Pd/C}$ , MeOH. c) benzoyl chloride, TEA, DMAP,  $\text{CH}_2\text{Cl}_2$ .

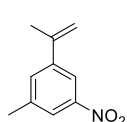

**1-methyl-3-(1-methylethenyl)-5-nitrobenzene (S1).** To a degassed mixture of 2 M aqueous  $\text{NaHCO}_3$  solution (4.0 mL, 8.0 mmol) and 1,4-dioxane (13.5 mL) were added 3-bromo-5-nitrotoluene (0.574 g, 2.66 mmol), 4,4,5,5-tetramethyl-2-(prop-1-en-2-yl)-1,3,2-dioxaborolane (0.998 g, 5.94 mmol), and  $\text{Pd}(\text{PPh}_3)_4$  (0.157 g, 0.14 mmol), and the mixture was heated at 100 °C for 5 hours. The reaction was cooled to room temperature before being diluted in  $\text{CH}_2\text{Cl}_2$  and saturated  $\text{NaHCO}_3$  solution. The organic layer was collected and washed with brine before being dried ( $\text{Na}_2\text{SO}_4$ ) and concentrated. The reaction was then passed through a silica plug (5% EtOAc in hexanes), and the filtrate was concentrated to afford the desired product (0.440 g, 93% yield) as a light tan solid (m.p. = 45 – 48 °C).  $^1\text{H}$  NMR (400 MHz,  $\text{CDCl}_3$ )  $\delta$  8.03 (s, 1H), 7.86 (s, 1H), 7.55 (s, 1H), 5.45 (s, 1H), 5.20 (s, 1H), 2.43 (s, 3H), 2.15 (s, 3H);  $^{13}\text{C}$  NMR (101 MHz,  $\text{CDCl}_3$ )  $\delta$  148.4, 142.6, 141.4, 139.6, 132.2, 122.5, 117.6, 114.8, 21.6, 21.3; IR (neat): 3088, 2924, 1530, 1351  $\text{cm}^{-1}$ ; Anal. Calcd for  $\text{C}_{10}\text{H}_{11}\text{NO}_2$ : C, 67.78%; H, 6.26%; N, 7.90%; Found: C, 67.65%; H, 6.27%; N, 7.63%.

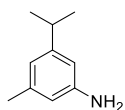

**3-isopropyl-5-methylaniline (S2).** To a stirring solution of S1 (0.416 g, 2.35 mmol) in MeOH (10 mL) was added 10%  $\text{Pd/C}$  (0.121 g). The reaction was fitted with a  $\text{H}_2$  balloon and stirred at room temperature for 24 h. The mixture was passed through a celite plug with additional MeOH, and the filtrate was concentrated to afford the desired product (0.336 g, 96% yield) as a brown oil.  $^1\text{H}$  NMR (400 MHz,  $\text{CDCl}_3$ )  $\delta$  6.46 (s, 1H), 6.35 (s, 1H), 6.31 (s, 1H), 3.90 (s, 2H), 2.74 (hept,  $J$  = 6.9 Hz, 1H), 2.21 (s, 3H), 1.19 (d,  $J$  = 7.0 Hz, 6H);  $^{13}\text{C}$  NMR (101 MHz,  $\text{CDCl}_3$ )  $\delta$  150.3, 145.9, 139.0, 118.2, 114.0, 110.9, 34.1, 24.1, 21.6; IR (neat): 3448, 3366, 3017, 2958, 1601, 1461  $\text{cm}^{-1}$ ; HRMS (ESI):  $m/z$  calcd for  $\text{C}_{10}\text{H}_{16}\text{N}$  [ $\text{M}+\text{H}$ ], 150.1283; found, 150.1274.

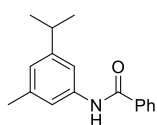

**N-(3-isopropyl-5-methylphenyl)benzamide (3h).** Prepared according to general procedure A for amide synthesis using S2 (0.298 g, 1.99 mmol), TEA (0.33 mL, 2.4 mmol), benzoyl chloride (0.25 mL, 2.2 mmol), 4-DMAP (0.004 g, 0.03 mmol), and  $\text{CH}_2\text{Cl}_2$  (10 mL). The reaction stirred for 18 h before being worked up as described. The residual solid was purified by flash chromatography (7% - 15% EtOAc in hexanes as eluent) to afford the desired product (0.441 g, 87% yield) as a solid (m.p. = 100 – 102 °C).  $^1\text{H}$  NMR (400 MHz,  $\text{CDCl}_3$ )  $\delta$  8.66 (s, 1H), 7.82 (d,  $J$  = 7.1 Hz, 2H), 7.41 – 7.31 (m, 3H), 7.27 (dd,  $J$  = 8.4, 7.0 Hz, 2H), 6.77 (s, 1H), 2.74 (hept,  $J$  = 6.9 Hz, 1H), 2.20 (s, 3H), 1.16 (d,  $J$  = 7.0 Hz, 6H);  $^{13}\text{C}$  NMR (101 MHz,  $\text{CDCl}_3$ )  $\delta$  166.3, 149.7, 138.6, 138.2, 135.1, 131.6, 128.5, 127.3, 123.5, 119.1, 116.1, 34.1, 24.0, 21.5; IR (neat): 3316, 2961, 1651, 1614, 1551, 1450, 1284  $\text{cm}^{-1}$ ; HRMS (ESI):  $m/z$  calcd for  $\text{C}_{17}\text{H}_{20}\text{NO}$  [ $\text{M}+\text{H}$ ], 254.1545; found, 254.1538.

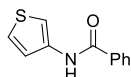

**N-thiophen-3-yl-benzamide (3i).** A mixture of 3-bromothiophene (1.90 mL, 20.3 mmol), benzamide (2.906 g, 24.0 mmol),  $\text{K}_3\text{PO}_4$  (8.548 g, 40.3 mmol), *trans*-1,2-diaminocyclohexane (0.35 mL, 2.9 mmol), and CuI (0.803 g, 4.2 mmol) in degassed dioxane (20 mL) was stirred at 110 °C in a sealed vial for 18 h. The reaction was filtered through a silica plug with EtOAc and the concentrated filtrate was recrystallized from EtOAc and hexanes to afford the desired product (1.479 g, 36% yield) of the title compound as a solid (m.p. = 156 - 160 °C).  $^1\text{H}$  NMR (400 MHz,  $\text{CDCl}_3$ )  $\delta$  8.23 (s, 1H), 7.89 – 7.81 (m, 2H), 7.72 (dd,  $J$  = 3.3, 1.4 Hz, 1H), 7.57 – 7.42 (m, 3H), 7.27 (dd,  $J$  = 5.0, 3.1 Hz, 1H), 7.13 (dd,  $J$  = 5.2, 1.4 Hz, 1H);  $^{13}\text{C}$  NMR (101 MHz,  $\text{CDCl}_3$ )

$\delta$  165.1, 135.6, 134.4, 131.8, 128.8, 127.0, 124.7, 121.3, 110.8. The NMR spectral data are consistent with those reported in the literature.<sup>8</sup>

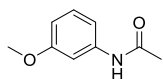

***N*-(3-methoxyphenyl)acetamide (3j).** Prepared according to general procedure A for amide synthesis using *m*-anisidine (5.60 mL, 49.8 mmol), TEA (8.35 mL, 59.9 mmol), acetyl chloride (3.90 mL, 54.8 mmol), 4-DMAP (0.061 g, 0.50 mmol), and CH<sub>2</sub>Cl<sub>2</sub> (250 mL). The reaction stirred for 3 h before being worked up as described. The residual solid was purified by recrystallization from EtOAc and hexanes to afford the desired product (6.554 g, 80% yield) of the title compound as a solid (m.p. = 84 - 86 °C). <sup>1</sup>H NMR (400 MHz, CDCl<sub>3</sub>)  $\delta$  8.10 (s, 1H), 7.27 (t, *J* = 2.1 Hz, 1H), 7.17 (t, *J* = 8.2 Hz, 1H), 7.00 (dd, *J* = 8.0, 0.9 Hz, 1H), 6.64 (dd, *J* = 8.2, 1.9 Hz, 1H), 3.74 (s, 3H), 2.13 (s, 3H). <sup>13</sup>C NMR (101 MHz, CDCl<sub>3</sub>)  $\delta$  169.0, 160.1, 139.3, 129.6, 112.3, 110.0, 105.9, 55.2, 24.5. The NMR spectral data are consistent with those reported in the literature.<sup>9</sup>

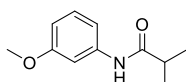

***N*-(3-methoxyphenyl)-2-methylpropanamide (3k).** Prepared according to general procedure A for amide synthesis using *m*-anisidine (1.13 mL, 10.1 mmol), TEA (1.47 mL, 10.5 mmol), isobutyryl chloride (1.11 mL, 10.6 mmol), 4-DMAP (0.012 g, 0.11 mmol), and EtOAc (50 mL) instead of CH<sub>2</sub>Cl<sub>2</sub>. The reaction stirred for 18 h before being worked up as described. The residue was purified by flash chromatography (20% EtOAc in hexanes as eluent) to afford the desired product (1.766 g, 91% yield) as a solid (m.p. = 63 - 65 °C). <sup>1</sup>H NMR (400 MHz, CDCl<sub>3</sub>)  $\delta$  7.85 (s, 1H), 7.36 (t, *J* = 2.3 Hz, 1H), 7.16 (t, *J* = 8.1 Hz, 1H), 7.00 (dd, *J* = 7.8, 1.0 Hz, 1H), 6.63 (dd, *J* = 8.2, 1.8 Hz, 1H), 3.74 (s, 3H), 2.52 (hept, *J* = 6.9 Hz, 1H), 1.21 (d, *J* = 6.9 Hz, 6H). <sup>13</sup>C NMR (101 MHz, CDCl<sub>3</sub>)  $\delta$  175.9, 160.1, 139.5, 129.5, 112.1, 110.1, 105.6, 55.2, 36.6, 19.6. The NMR spectral data are consistent with those reported in the literature.<sup>10</sup>

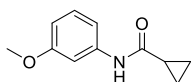

***N*-(3-methoxyphenyl)cyclopropanecarboxamide (3l).** Prepared according to general procedure B for amide synthesis using *m*-anisidine (2.25 mL, 20.0 mmol), pyridine (25 mL, 310 mmol), cyclopropane carbonyl chloride (1.82 mL, 20.0 mmol), and THF (4.0 mL). The reaction stirred for 1 h before being worked up as described. The residual solid was purified by recrystallization from EtOAc and hexanes to afford the desired product (2.239 g, 59% yield) as a light peach solid (m.p. = 108 - 110 °C). <sup>1</sup>H NMR (400 MHz, CDCl<sub>3</sub>)  $\delta$  7.63 (s, 1H), 7.32 (s, 1H), 7.18 (t, *J* = 8.1 Hz, 1H), 6.95 (dd, *J* = 8.0, 1.1 Hz, 1H), 6.64 (dd, *J* = 8.2, 1.8 Hz, 1H), 3.77 (s, 3H), 1.55 - 1.45 (m, 1H), 1.10 - 1.05 (m, 2H), 0.85 - 0.79 (m, 2H). <sup>13</sup>C NMR (101 MHz, CDCl<sub>3</sub>)  $\delta$  172.1, 160.2, 139.4, 129.6, 111.7, 110.1, 105.3, 55.3, 15.8, 8.0. The NMR spectral data and melting point data are consistent with those reported in the literature.<sup>11</sup>

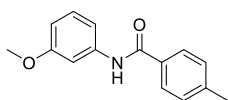

***N*-(3-methoxyphenyl)-4-methylbenzamide (3m).** Prepared according to general procedure A for amide synthesis using *m*-anisidine (1.13 mL, 10 mmol), TEA (1.47 mL, 10.6 mmol), *p*-toluoyl chloride (1.45 mL, 11 mmol), 4-DMAP (0.013 g, 0.11 mmol), and CH<sub>2</sub>Cl<sub>2</sub> (50 mL). The reaction stirred for 18 h before being worked up as described. The residual solid was purified by recrystallization from EtOAc and hexanes to afford the desired product (1.829 g, 79% yield) as a solid (m.p. = 117 - 120 °C). <sup>1</sup>H NMR (400 MHz, CDCl<sub>3</sub>)  $\delta$  7.93 (s, 1H), 7.74 (d, *J* = 8.2 Hz, 2H), 7.44 (t, *J* = 2.3 Hz, 1H), 7.27 - 7.19 (m, 3H), 7.09 (ddd, *J* = 8.0, 2.0, 0.9 Hz, 1H), 6.68 (ddd, *J* = 8.3, 2.5, 1.0 Hz, 1H), 3.80 (s, 3H), 2.40 (s, 3H). <sup>13</sup>C NMR (101 MHz, CDCl<sub>3</sub>)  $\delta$  165.7, 160.2, 142.4, 139.3, 132.1, 129.7, 129.4, 127.0, 112.3, 110.4, 105.8, 55.3, 21.5. The NMR spectral data and melting point data are consistent with those reported in the literature.<sup>12</sup>

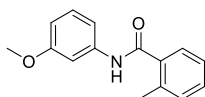

***N*-(3-methoxyphenyl)-2-methylbenzamide (3n).** Prepared according to general procedure A for amide synthesis using *m*-anisidine (1.12 mL, 10 mmol), TEA (1.7 mL, 12 mmol), *o*-toluoyl chloride (1.45 mL, 11 mmol), 4-DMAP (0.012 g, 0.098 mmol), and CH<sub>2</sub>Cl<sub>2</sub> (50 mL). The reaction stirred for 18 h before being worked up as described. The residual solid was purified by recrystallization from EtOAc and hexanes to afford the desired product (2.402 g, 99% yield) as a solid (m.p. = 144 - 146 °C). <sup>1</sup>H NMR (400 MHz, CDCl<sub>3</sub>)  $\delta$  7.60 (s, 1H), 7.46 - 7.37 (m, 2H), 7.33 (td, *J* = 7.5, 1.5 Hz, 1H), 7.28 - 7.18 (m, 3H), 7.06 (d, *J* = 8.1 Hz, 1H), 6.69 (ddd, *J* = 8.2, 2.5, 0.9 Hz, 1H), 3.80 (s, 3H), 2.47 (s, 3H). <sup>13</sup>C NMR (101 MHz, CDCl<sub>3</sub>)  $\delta$  168.1, 160.2, 139.3, 136.42, 136.36, 131.2, 130.2, 129.7, 126.6, 125.9, 112.0, 110.4, 105.6, 55.3, 19.8. The NMR spectral data are consistent with those reported in the literature.<sup>13</sup>

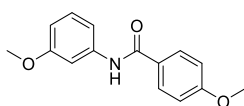

**4-methoxy-*N*-(3-methoxyphenyl)benzamide (3o).** Prepared according to general procedure B for amide synthesis using *m*-anisidine (2.30 mL, 20.5 mmol), pyridine (25 mL), 4-methoxybenzoyl chloride (2.79 mL, 20.6 mmol), and THF (4 mL). The reaction stirred for 1 h before being worked up as described. The residual solid was purified by recrystallization from EtOAc and hexanes to afford the desired product (4.059 g, 77% yield) as a solid (m.p. = 144 - 145 °C). <sup>1</sup>H NMR (400 MHz, CDCl<sub>3</sub>) δ 7.87 – 7.77 (m, 3H), 7.43 (t, *J* = 2.3 Hz, 1H), 7.23 (t, *J* = 8.2 Hz, 1H), 7.08 (ddd, *J* = 8.0, 2.1, 1.0 Hz, 1H), 6.95 (d, *J* = 8.9 Hz, 2H), 6.69 (ddd, *J* = 8.3, 2.5, 0.9 Hz, 1H), 3.86 (s, 3H), 3.81 (s, 3H); <sup>13</sup>C NMR (101 MHz, CDCl<sub>3</sub>) δ 165.3, 162.5, 160.2, 139.4, 129.7, 128.9, 127.1, 114.0, 112.2, 110.4, 105.7, 55.5, 55.3; IR (neat): 3306, 3002, 2935, 1646, 1605, 1508, 1249, 1176, 1031 cm<sup>-1</sup>; HRMS (ESI): *m/z* calcd for C<sub>15</sub>H<sub>16</sub>NO<sub>3</sub> [M+H], 258.1130; found, 258.1130. The melting point data is consistent with that reported in the literature.<sup>14</sup>

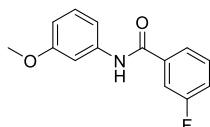

**3-fluoro-*N*-(3-methoxyphenyl)-benzamide (3p).** Prepared according to general procedure B for amide synthesis using *m*-anisidine (1.12 mL, 10 mmol), pyridine (25 mL), 3-fluorobenzoyl chloride (1.22 mL, 10 mmol), and THF (4 mL). The reaction stirred for 1.5 h before being worked up as described. The residual solid was purified by recrystallization from EtOAc and hexanes to afford the desired product (1.861 g, 76% yield) as a solid (m.p. = 95 - 97 °C). <sup>1</sup>H NMR (400 MHz, CDCl<sub>3</sub>) δ 8.20 (s, 1H), 7.57 (ddd, *J* = 7.7, 1.7, 1.0 Hz, 1H), 7.52 (ddd, *J* = 9.3, 2.6, 1.7 Hz, 1H), 7.39 – 7.32 (m, 2H), 7.26 – 7.14 (m, 2H), 7.10 (ddd, *J* = 7.9, 2.0, 1.0 Hz, 1H), 6.68 (ddd, *J* = 8.2, 2.5, 1.0 Hz, 1H), 3.76 (s, 3H). <sup>13</sup>C NMR (101 MHz, CDCl<sub>3</sub>) δ 164.8 (d, <sup>4</sup>*J*<sub>C-F</sub> = 3 Hz), 162.7 (d, <sup>1</sup>*J*<sub>C-F</sub> = 248 Hz), 160.2, 138.9, 137.2 (d, <sup>3</sup>*J*<sub>C-F</sub> = 7 Hz), 130.4 (d, <sup>3</sup>*J*<sub>C-F</sub> = 8 Hz), 129.7, 122.5 (d, <sup>4</sup>*J*<sub>C-F</sub> = 3 Hz), 118.8 (d, <sup>2</sup>*J*<sub>C-F</sub> = 21 Hz), 114.5 (d, <sup>2</sup>*J*<sub>C-F</sub> = 23 Hz), 112.7, 110.7, 106.2, 55.3. The <sup>1</sup>H NMR spectral data are consistent with those reported in the literature.<sup>15</sup>

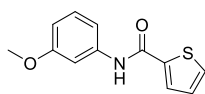

***N*-(3-methoxyphenyl)-2-thiophenecarboxamide (3q).** Prepared according to general procedure B for amide synthesis using *m*-anisidine (2.25 mL, 20.0 mmol), pyridine (25 mL, 310 mmol), 2-thiophenecarbonyl chloride (2.14 mL, 20.0 mmol), and THF (4.0 mL). The reaction stirred for 1.5 h before being worked up as described. The residual solid was purified by recrystallization from EtOAc and hexanes to afford the desired product (3.146 g, 67% yield) as a light purple solid (m.p. = 143 - 146 °C). <sup>1</sup>H NMR (400 MHz, CDCl<sub>3</sub>) δ 7.85 (s, 1H), 7.63 (dd, *J* = 3.8, 1.2 Hz, 1H), 7.53 (dd, *J* = 5.0, 1.2 Hz, 1H), 7.41 (t, *J* = 2.2 Hz, 1H), 7.22 (t, *J* = 8.1 Hz, 1H), 7.09 (dd, *J* = 5.0, 3.7 Hz, 1H), 7.06 (ddd, *J* = 8.0, 2.0, 0.9 Hz, 1H), 6.69 (ddd, *J* = 8.3, 2.5, 0.9 Hz, 1H), 3.80 (s, 3H). <sup>13</sup>C NMR (101 MHz, CDCl<sub>3</sub>) δ 160.2, 160.0, 139.3, 138.9, 130.8, 129.7, 128.4, 127.8, 112.3, 110.7, 105.8, 55.3. The NMR spectral data are consistent with those reported in the literature.<sup>16</sup>

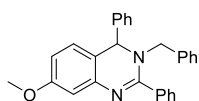

**3-Benzyl-7-methoxy-2,4-diphenyl-3,4-dihydroquinazoline (2).** Prepared according to the general 3,4-dihydroquinazoline synthesis protocol with **1** (0.226 g, 0.99 mmol), benzylamine (0.12 mL, 1.1 mmol), benzaldehyde (0.11 mL, 1.1 mmol), CH<sub>2</sub>Cl<sub>2</sub> (10.0 mL), 2-chloropyridine (0.11 mL, 1.2 mmol), and Tf<sub>2</sub>O (0.18 mL, 1.1 mmol). The reaction proceeded for 24 h at rt after addition of Tf<sub>2</sub>O and was worked up as described above. The residue was passed through a silica plug (90:10:0.5 EtOAc:hexanes:TEA as eluent) and the concentrated filtrate was further purified by flash chromatography (0% - 2% MeOH in 100:5 CH<sub>2</sub>Cl<sub>2</sub>:ether mixture as eluent) to afford the desired product (0.337 g, 84% yield) as a solid (m.p. = 172 - 174 °C). <sup>1</sup>H NMR (400 MHz, CDCl<sub>3</sub>) δ 7.53 – 7.48 (m, 2H), 7.41 – 7.23 (m, 11H), 7.19 (d, *J* = 6.8 Hz, 1H), 6.89 (d, *J* = 2.6 Hz, 1H), 6.62 (d, *J* = 8.4 Hz, 1H), 6.52 (dd, *J* = 8.4, 2.6 Hz, 1H), 5.37 (s, 1H), 4.69 (d, *J* = 15.7 Hz, 1H), 3.98 (d, *J* = 15.7 Hz, 1H), 3.76 (s, 3H); <sup>13</sup>C NMR (101 MHz, CDCl<sub>3</sub>) δ 159.7, 158.2, 144.0, 142.4, 136.6, 136.5, 129.3, 129.0, 128.9, 128.7, 128.1, 128.0, 127.7, 127.3, 127.2, 126.9, 117.1, 112.2, 108.7, 60.5, 55.2, 53.3. IR (neat): 3027, 2933, 1585, 1545, 1489, 1422, 1262, 1124, 1031 cm<sup>-1</sup>; HRMS (ESI): *m/z* calcd for C<sub>28</sub>H<sub>25</sub>N<sub>2</sub>O [M+H], 405.1967; found, 405.1967.

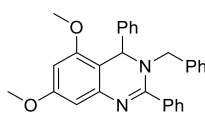

**3-Benzyl-5,7-dimethoxy-2,4-diphenyl-3,4-dihydroquinazoline (4a).** Prepared according to the general 3,4-dihydroquinazoline synthesis protocol with **3a** (0.255 g, 0.99 mmol), benzylamine (0.12 mL, 1.1 mmol), benzaldehyde (0.11 mL, 1.1 mmol), CH<sub>2</sub>Cl<sub>2</sub> (10.0 mL), 2-chloropyridine (0.11 mL, 1.2 mmol), and Tf<sub>2</sub>O (0.18

mL, 1.1 mmol). The reaction proceeded for 24 h at rt after addition of  $\text{TiF}_4$  and was worked up as described above. The residue was purified by flash chromatography (5% - 10% ether in  $\text{CH}_2\text{Cl}_2$  as eluent) to afford the desired product (0.260 g, 60% yield) as a solid (m.p. = 168 - 169 °C).  $^1\text{H}$  NMR (400 MHz,  $(\text{CD}_3)_2\text{CO}$ )  $\delta$  7.55 - 7.50 (m, 2H), 7.49 - 7.42 (m, 5H), 7.42 - 7.22 (m, 8H), 6.41 (d,  $J$  = 2.3 Hz, 1H), 6.21 (d,  $J$  = 2.3 Hz, 1H), 5.54 (s, 1H), 4.73 (d,  $J$  = 15.8 Hz, 1H), 4.19 (d,  $J$  = 15.8 Hz, 1H), 3.79 (s, 3H), 3.59 (s, 3H);  $^{13}\text{C}$  NMR (101 MHz,  $(\text{CD}_3)_2\text{CO}$ )  $\delta$  161.4, 158.9, 156.7, 144.9, 138.5, 138.0, 130.1, 129.6, 129.3, 129.2, 129.2, 128.58, 128.5, 128.1, 128.0, 107.5, 101.9, 96.2, 56.9, 55.8, 55.5, 54.3; IR (neat): 3027, 2935, 1597, 1541, 1487, 1422, 1128, 1107  $\text{cm}^{-1}$ ; HRMS (ESI):  $m/z$  calcd for  $\text{C}_{29}\text{H}_{27}\text{N}_2\text{O}_2$  [M+H], 435.2073; found, 435.2074.

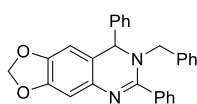

**7-benzyl-7,8-dihydro-6,8-diphenyl-1,3-dioxolo[4,5-g]quinazoline (4b).** Prepared according to the general 3,4-dihydroquinazoline protocol with **3b** (0.243 g, 1.01 mmol), benzylamine (0.12 mL, 1.1 mmol), benzaldehyde (0.11 mL, 1.1 mmol),  $\text{CH}_2\text{Cl}_2$  (10.0 mL), 2-chloropyridine (0.11 mL, 1.2 mmol), and  $\text{TiF}_4$  (0.18 mL, 1.1 mmol). The reaction proceeded for 24 h at rt after addition of  $\text{TiF}_4$  and was worked up as described above. The residue was passed through a silica plug (90:10:0.5 EtOAc:hexanes:TEA as eluent) and the concentrated filtrate was further purified by flash chromatography (40% - 50% EtOAc in hexanes as eluent) to afford the desired product (0.289 g, 69% yield) as a solid (m.p. = 197 - 199 °C).  $^1\text{H}$  NMR (400 MHz,  $\text{CDCl}_3$ )  $\delta$  7.53 - 7.46 (m, 2H), 7.41 - 7.21 (m, 11H), 7.19 (d,  $J$  = 6.7 Hz, 2H), 6.85 (s, 1H), 6.17 (s, 1H), 5.84 (d,  $J$  = 1.4 Hz, 1H), 5.79 (d,  $J$  = 1.4 Hz, 1H), 5.28 (s, 1H), 4.68 (d,  $J$  = 15.7 Hz, 1H), 3.98 (d,  $J$  = 15.7 Hz, 1H);  $^{13}\text{C}$  NMR (101 MHz,  $\text{CDCl}_3$ )  $\delta$  156.5, 147.4, 144.9, 143.7, 136.7, 136.4, 136.3, 129.3, 129.1, 128.9, 128.6, 128.2, 128.1, 127.8, 127.3, 126.9, 117.4, 105.8, 100.9, 60.9, 53.3; IR (neat): 3027, 2889, 1556, 1474, 1424, 1241, 1135, 1036  $\text{cm}^{-1}$ ; HRMS (ESI):  $m/z$  calcd for  $\text{C}_{28}\text{H}_{23}\text{N}_2\text{O}_2$  [M+H], 419.1760; found, 419.1754.

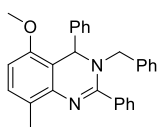

**3-benzyl-5-methoxy-8-methyl-2,4-diphenyl-3,4-dihydroquinazoline (4c).** Prepared according to the general 3,4-dihydroquinazoline synthesis protocol with **3c** (0.245 g, 1.02 mmol), benzylamine (0.12 mL, 1.1 mmol), benzaldehyde (0.11 mL, 1.1 mmol),  $\text{CH}_2\text{Cl}_2$  (10.0 mL), 2-chloropyridine (0.11 mL, 1.2 mmol), and  $\text{TiF}_4$  (0.18 mL, 1.1 mmol). The reaction proceeded for 48 h at rt after addition of  $\text{TiF}_4$  and was worked up as described above. The residue was passed through a silica plug (90:10:0.5 EtOAc:hexanes:TEA as eluent) and the concentrated filtrate was further purified by flash chromatography (2% - 5% ether in  $\text{CH}_2\text{Cl}_2$  as eluent) to afford the desired product (0.335 g, 79% yield) as a solid (m.p. = 173 - 176 °C).  $^1\text{H}$  NMR (400 MHz,  $\text{CDCl}_3$ )  $\delta$  7.58 - 7.50 (m, 2H), 7.44 (d,  $J$  = 6.9 Hz, 2H), 7.38 - 7.11 (m, 11H), 7.02 (d,  $J$  = 8.3 Hz, 1H), 6.41 (d,  $J$  = 8.3 Hz, 1H), 5.55 (s, 1H), 4.75 (d,  $J$  = 15.6 Hz, 1H), 4.16 (d,  $J$  = 15.6 Hz, 1H), 3.48 (s, 3H), 2.46 (s, 3H);  $^{13}\text{C}$  NMR (101 MHz,  $\text{CDCl}_3$ )  $\delta$  157.4, 153.1, 143.3, 140.9, 137.2, 136.7, 129.5, 129.2, 128.8, 128.6, 128.5, 128.4, 127.6, 127.5, 127.28, 127.25, 125.0, 114.1, 106.8, 56.0, 55.4, 53.8, 17.0; IR (neat): 3027, 2922, 1607, 1545, 1489, 1452, 1264, 1096  $\text{cm}^{-1}$ ; HRMS (ESI):  $m/z$  calcd for  $\text{C}_{29}\text{H}_{27}\text{N}_2\text{O}$  [M+H], 419.2123; found, 419.2102.

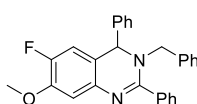

**3-benzyl-6-fluoro-7-methoxy-2,4-diphenyl-3,4-dihydroquinazoline (4d).** Prepared according to the general 3,4-dihydroquinazoline protocol with **3d** (0.246 g, 1.00 mmol), benzylamine (0.12 mL, 1.1 mmol), benzaldehyde (0.11 mL, 1.1 mmol),  $\text{CH}_2\text{Cl}_2$  (10.0 mL), 2-chloropyridine (0.11 mL, 1.2 mmol), and  $\text{TiF}_4$  (0.18 mL, 1.1 mmol). The reaction proceeded for 48 h at rt after addition of  $\text{TiF}_4$  and was worked up as described above. The residue was passed through a silica plug (90:10:0.5 EtOAc:hexanes:TEA as eluent) and the concentrated filtrate was further purified by flash chromatography (3% ether in  $\text{CH}_2\text{Cl}_2$  as eluent) to afford the desired product (0.164 g, 39% yield) as a solid (m.p. = 151 - 155 °C).  $^1\text{H}$  NMR (400 MHz,  $\text{CDCl}_3$ )  $\delta$  7.55 - 7.46 (m, 2H), 7.44 - 7.25 (m, 11H), 7.18 (d,  $J$  = 6.7 Hz, 2H), 6.96 (d,  $J$  = 8.2 Hz, 1H), 6.43 (d,  $J$  = 11.2 Hz, 1H), 5.32 (s, 1H), 4.70 (d,  $J$  = 15.7 Hz, 1H), 3.96 (d,  $J$  = 15.7 Hz, 1H), 3.84 (s, 3H);  $^{13}\text{C}$  NMR (101 MHz,  $\text{CDCl}_3$ )  $\delta$  157.7, 149.8 (d,  $^1J_{\text{C-F}}$  = 244 Hz), 147.4 (d,  $^2J_{\text{C-F}}$  = 12 Hz), 143.4, 137.8 (d,  $^3J_{\text{C-F}}$  = 3 Hz), 136.39, 136.36, 129.4, 129.2, 128.9, 128.7, 128.4, 127.94, 127.86, 127.3, 126.9, 116.4 (d,  $^3J_{\text{C-F}}$  = 6 Hz), 113.3 (d,  $^2J_{\text{C-F}}$  = 20 Hz), 109.7 (d,  $^4J_{\text{C-F}}$  = 2 Hz), 60.2 (d,  $^4J_{\text{C-F}}$  = 1 Hz), 56.0, 53.3; IR (neat): 3029, 2932, 1552, 1495, 1446, 1274, 1146, 1105, 1076  $\text{cm}^{-1}$ ; HRMS (ESI):  $m/z$  calcd for  $\text{C}_{28}\text{H}_{24}\text{FN}_2\text{O}$  [M+H], 423.1873; found, 423.1873.

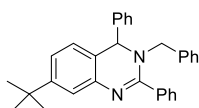

**3-Benzyl-2,4-diphenyl-7-(tert-butyl)-3,4-dihydroquinazoline (4e).** Prepared according to the general 3,4-dihydroquinazoline protocol with **3e** (0.254 g, 1.00 mmol), benzylamine (0.12 mL, 1.1 mmol), benzaldehyde (0.11 mL, 1.1 mmol), CH<sub>2</sub>Cl<sub>2</sub> (10.0 mL), 2-chloropyridine (0.11 mL, 1.2 mmol), and Tf<sub>2</sub>O (0.18 mL, 1.1 mmol). The reaction proceeded for 48 h at rt after addition of Tf<sub>2</sub>O and was worked up as described above. The residue was passed through a silica plug (90:10:0.5 EtOAc:hexanes:TEA as eluent) and the concentrated filtrate was further purified by flash chromatography (5% ether in CH<sub>2</sub>Cl<sub>2</sub> as eluent) to afford the desired product (0.191 g, 44% yield) as a solid (m.p. = 64 – 65 °C). <sup>1</sup>H NMR (400 MHz, CDCl<sub>3</sub>) δ 7.55 – 7.50 (m, 2H), 7.42 – 7.23 (m, 12H), 7.19 (d, *J* = 6.7 Hz, 2H), 6.97 (dd, *J* = 8.0, 2.1 Hz, 1H), 6.65 (d, *J* = 8.0 Hz, 1H), 5.42 (s, 1H), 4.69 (d, *J* = 15.6 Hz, 1H), 3.95 (d, *J* = 15.6 Hz, 1H), 1.28 (s, 9H); <sup>13</sup>C NMR (101 MHz, CDCl<sub>3</sub>) δ 157.8, 151.4, 143.8, 140.2, 136.3, 129.3, 129.0, 128.8, 128.7, 128.1, 128.0, 127.8, 127.5, 127.0, 126.0, 122.2, 121.9, 121.6, 60.6, 53.1, 34.6, 31.3; IR (neat): 3029, 2961, 1582, 1549, 1493, 1420, 1089 cm<sup>-1</sup>; HRMS (ESI): *m/z* calcd for C<sub>31</sub>H<sub>31</sub>N<sub>2</sub> [M+H], 431.2487; found, 431.2468.

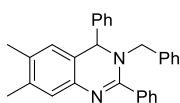

**3-Benzyl-6,7-dimethyl-2,4-diphenyl-3,4-dihydroquinazoline (4f).** Prepared according to the general 3,4-dihydroquinazoline synthesis protocol with **3f** (0.226 g, 1.00 mmol), benzylamine (0.12 mL, 1.1 mmol), benzaldehyde (0.11 mL, 1.1 mmol), CH<sub>2</sub>Cl<sub>2</sub> (10.0 mL), 2-chloropyridine (0.11 mL, 1.2 mmol), and Tf<sub>2</sub>O (0.18 mL, 1.1 mmol). The reaction proceeded for 48 h at rt after addition of Tf<sub>2</sub>O and was worked up as described above. The residue was purified by flash chromatography (2% MeOH, 20% EtOAc, 78% hexanes as eluent) to afford the desired product (0.279 g, 69% yield) as a solid (m.p. = 63 - 66 °C). <sup>1</sup>H NMR (400 MHz, CDCl<sub>3</sub>) δ 7.52 – 7.45 (m, 2H), 7.41 – 7.12 (m, 14H), 6.47 (s, 1H), 5.33 (s, 1H), 4.67 (d, *J* = 15.7 Hz, 1H), 3.96 (d, *J* = 15.7 Hz, 1H), 2.17 (s, 3H), 2.04 (s, 3H); <sup>13</sup>C NMR (101 MHz, CDCl<sub>3</sub>) δ 157.3, 144.1, 139.1, 136.8, 136.7, 136.4, 133.3, 129.1, 129.0, 128.8, 128.6, 128.5, 128.04, 128.00, 127.6, 127.28, 127.27, 126.9, 126.0, 122.1, 60.5, 53.2, 19.5, 19.2; IR (neat): 3027, 2920, 1582, 1551, 1493, 1452, 1422, 1318, 1154 cm<sup>-1</sup>; HRMS (ESI): *m/z* calcd for C<sub>29</sub>H<sub>27</sub>N<sub>2</sub> [M+H], 403.2174; found, 403.2170.

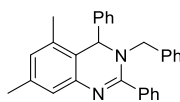

**3-Benzyl-5,7-dimethyl-2,4-diphenyl-3,4-dihydroquinazoline (4g).** Prepared according to the general 3,4-dihydroquinazoline synthesis protocol with **3g** (0.238 g, 1.06 mmol), benzylamine (0.12 mL, 1.1 mmol), benzaldehyde (0.11 mL, 1.1 mmol), CH<sub>2</sub>Cl<sub>2</sub> (10.0 mL), 2-chloropyridine (0.11 mL, 1.2 mmol), and Tf<sub>2</sub>O (0.18 mL, 1.1 mmol). The reaction proceeded for 48 h at rt after addition of Tf<sub>2</sub>O and was worked up as described above. The residue was passed through a silica plug (90:10:0.5 EtOAc:hexanes:TEA as eluent) and the concentrated filtrate was further purified by flash chromatography (0% - 2% methanol in 96:4 CH<sub>2</sub>Cl<sub>2</sub>:ether mixture as eluent) to afford the desired product (0.258 g, 61% yield) as a solid (m.p. = 90 - 92 °C). <sup>1</sup>H NMR (400 MHz, CDCl<sub>3</sub>) δ 7.44 – 7.19 (m, 15H), 7.09 (s, 1H), 6.68 – 6.62 (m, 1H), 5.32 (s, 1H), 4.64 (d, *J* = 15.7 Hz, 1H), 4.13 (d, *J* = 15.6 Hz, 1H), 2.28 (s, 3H), 1.82 (s, 3H); <sup>13</sup>C NMR (101 MHz, CDCl<sub>3</sub>) δ 157.5, 141.9, 137.7, 136.9, 136.6, 133.6, 129.2, 128.8, 128.6, 128.5, 128.4, 128.1, 128.0, 127.9, 127.8, 127.7, 127.2, 123.3, 120.9, 58.0, 53.2, 21.1, 18.2; IR (neat): 3027, 2915, 1588, 1543, 1446, 1325, 1157, 1047 cm<sup>-1</sup>; HRMS (ESI): *m/z* calcd for C<sub>29</sub>H<sub>27</sub>N<sub>2</sub> [M+H], 403.2174; found, 403.2183.

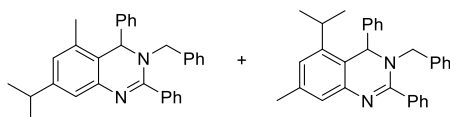

**3-Benzyl-7-isopropyl-5-methyl-2,4-diphenyl-3,4-dihydroquinazoline (4ha) and 3-Benzyl-5-isopropyl-7-methyl-2,4-diphenyl-3,4-dihydroquinazoline (4hb).** Prepared according to the general 3,4-dihydroquinazoline synthesis protocol with **3h** (0.253 g, 1.00 mmol), benzylamine (0.12 mL, 1.1 mmol), benzaldehyde (0.11 mL, 1.1 mmol), CH<sub>2</sub>Cl<sub>2</sub> (10.0 mL), 2-chloropyridine (0.11 mL, 1.2 mmol), and Tf<sub>2</sub>O (0.18 mL, 1.1 mmol). The reaction proceeded for 48 h at rt after addition of Tf<sub>2</sub>O and was worked up as described above. The residue was passed through a silica plug (90:10:0.5 EtOAc:hexanes:TEA as eluent) and the concentrated filtrate was further purified by flash chromatography (20% to 25% EtOAc in cyclohexane as eluent) to afford the desired product (0.257 g, 60% yield) as a 2.7:1 mixture of regioisomers. **Major regioisomer 4ha** (solid, m.p. = 171 – 174 °C): <sup>1</sup>H NMR (400 MHz, CDCl<sub>3</sub>) δ 7.44 – 7.21 (m, 15H), 7.14 (s, 1H), 6.69 (s, 1H), 5.32 (s, 1H), 4.61 (d, *J* = 15.6 Hz, 1H), 4.08 (d, *J* = 15.7 Hz, 1H), 2.83 (hept, *J* = 6.9 Hz, 1H), 1.85 (s, 3H), 1.24 (d, *J* = 6.9 Hz, 6H); <sup>13</sup>C NMR (101 MHz, CDCl<sub>3</sub>) δ 157.4, 148.7, 142.0, 141.9, 136.8, 136.8, 133.6, 129.1, 128.82, 128.80, 128.5, 128.0, 127.9, 127.7, 127.4, 125.5, 121.1,

120.7, 58.2, 53.0, 33.7, 24.1, 23.7, 18.4; IR (neat): 3025, 2958, 1590, 1545, 1446, 1323, 1157, 1075  $\text{cm}^{-1}$ ; HRMS (ESI):  $m/z$  calcd for  $\text{C}_{31}\text{H}_{31}\text{N}_2$  [M+H], 431.2487; found, 431.2477. **Minor regioisomer 4hb** (solid, m.p. = 64 – 69  $^{\circ}\text{C}$ ):  $^1\text{H}$  NMR (400 MHz,  $\text{CDCl}_3$ )  $\delta$  7.46 – 7.12 (m, 16H), 6.80 (s, 1H), 5.50 (s, 1H), 4.69 (d,  $J$  = 15.5 Hz, 1H), 4.23 (d,  $J$  = 15.4 Hz, 1H), 2.61 (hept,  $J$  = 6.8 Hz, 1H), 2.34 (s, 3H), 0.86 (d,  $J$  = 6.8 Hz, 3H), 0.71 (d,  $J$  = 6.8 Hz, 3H);  $^{13}\text{C}$  NMR (101 MHz,  $\text{CDCl}_3$ )  $\delta$  157.3, 144.3, 142.1, 138.2, 136.7, 135.8, 129.7, 128.9, 128.8, 128.6, 128.4, 128.1, 127.9, 127.6, 127.5, 123.4, 122.8, 118.8, 57.2, 53.6, 27.9, 24.0, 22.5, 21.4; IR (neat): 3029, 2961, 1579, 1545, 1456, 1325, 1156, 1027  $\text{cm}^{-1}$ ; HRMS (ESI):  $m/z$  calcd for  $\text{C}_{31}\text{H}_{31}\text{N}_2$  [M+H], 431.2487; found, 431.2483.

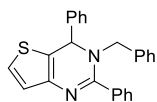

**6-Benzyl-5,7-diphenyl-1-thia-4,6-diaza-3a,6,7,7a-tetrahydroindene (4i).**

Prepared according to the general 3,4-dihydroquinazoline synthesis protocol with **3i** (0.204 g, 1.00 mmol), benzylamine (0.12 mL, 1.1 mmol), benzaldehyde (0.11 mL, 1.1 mmol),  $\text{CH}_2\text{Cl}_2$  (10.0 mL), 2-chloropyridine (0.11 mL, 1.2 mmol), and  $\text{Ti}_2\text{O}$  (0.18 mL, 1.1 mmol). The reaction proceeded for 24 h at rt after addition of  $\text{Ti}_2\text{O}$  and was worked up as described above. The residue was purified by flash chromatography (25% EtOAc in hexanes as eluent) to afford the desired product (0.151 g, 40% yield) as a solid (m.p. = 171 – 174  $^{\circ}\text{C}$ ).  $^1\text{H}$  NMR (400 MHz,  $\text{CDCl}_3$ )  $\delta$  7.50 (dd,  $J$  = 7.6, 2.1 Hz, 2H), 7.43 – 7.26 (m, 11H), 7.19 (d,  $J$  = 6.7 Hz, 2H), 7.05 (d,  $J$  = 5.2 Hz, 1H), 7.01 (d,  $J$  = 5.2 Hz, 1H), 5.72 (s, 1H), 4.72 (d,  $J$  = 15.7 Hz, 1H), 3.92 (d,  $J$  = 15.7 Hz, 1H);  $^{13}\text{C}$  NMR (101 MHz,  $\text{CDCl}_3$ )  $\delta$  156.7, 142.7, 142.5, 136.5, 136.1, 129.2, 129.0, 128.9, 128.6, 128.4, 128.0, 127.8, 127.3, 126.8, 124.7, 123.3, 118.9, 60.0, 53.3; IR (neat): 3027, 2920, 1152, 1534, 1409, 1308, 1157  $\text{cm}^{-1}$ ; HRMS (ESI):  $m/z$  calcd for  $\text{C}_{25}\text{H}_{21}\text{N}_2\text{S}$  [M+H], 381.1425; found, 381.1424.

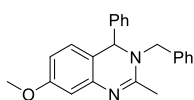

**3-Benzyl-7-methoxy-2-methyl-4-phenyl-3,4-dihydroquinazoline (4j).**

Prepared according to the general 3,4-dihydroquinazoline synthesis protocol with **3j** (0.165 g, 1.00 mmol), benzylamine (0.12 mL, 1.1 mmol), benzaldehyde (0.11 mL, 1.1 mmol),  $\text{CH}_2\text{Cl}_2$  (10.0 mL), 2-chloropyridine (0.11 mL, 1.2 mmol), and  $\text{Ti}_2\text{O}$  (0.18 mL, 1.1 mmol). The reaction proceeded for 24 h at rt after addition of  $\text{Ti}_2\text{O}$  and was worked up as described above. The residue was purified by flash chromatography (0% - 1% MeOH in EtOAc as eluent) to afford the desired product (0.218 g, 64% yield) as an oil.  $^1\text{H}$  NMR (400 MHz,  $\text{CDCl}_3$ )  $\delta$  7.39 – 7.17 (m, 10H), 6.74 (d,  $J$  = 2.6 Hz, 1H), 6.59 (d,  $J$  = 8.4 Hz, 1H), 6.47 (dd,  $J$  = 8.4, 2.6 Hz, 1H), 5.36 (s, 1H), 4.73 (d,  $J$  = 16.6 Hz, 1H), 4.09 (d,  $J$  = 16.6 Hz, 1H), 3.75 (s, 3H), 2.29 (s, 3H);  $^{13}\text{C}$  NMR (101 MHz,  $\text{CDCl}_3$ )  $\delta$  159.7, 156.4, 144.0, 142.0, 136.1, 129.0, 129.0, 128.0, 127.7, 127.2, 126.9, 126.6, 117.1, 111.6, 107.8, 62.0, 55.2, 51.8, 22.8. IR (neat) 3025, 2952, 1588, 1556, 1493, 1442, 1150, 1029  $\text{cm}^{-1}$ ; HRMS (ESI):  $m/z$  calcd for  $\text{C}_{23}\text{H}_{23}\text{N}_2\text{O}$  [M+H], 343.1810; found, 343.1826.

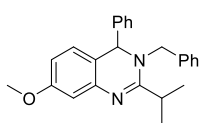

**3-Benzyl-2-isopropyl-7-methoxy-4-phenyl-3,4-dihydroquinazoline (4k).**

Prepared according to the general 3,4-dihydroquinazoline synthesis protocol with **3k** (0.194 g, 1.00 mmol), benzylamine (0.12 mL, 1.1 mmol), benzaldehyde (0.11 mL, 1.1 mmol),  $\text{CH}_2\text{Cl}_2$  (10.0 mL), 2-chloropyridine (0.11 mL, 1.2 mmol), and  $\text{Ti}_2\text{O}$  (0.18 mL, 1.1 mmol). The reaction proceeded for 24 h at rt after addition of  $\text{Ti}_2\text{O}$  and was worked up as described above. The residue was purified by flash chromatography (10% - 20% EtOAc in 100:2 hexanes:TEA mixture as eluent) to afford the desired product (0.329 g, 88% yield) as a solid (m.p. = 131 – 134  $^{\circ}\text{C}$ ).  $^1\text{H}$  NMR (400 MHz,  $\text{CDCl}_3$ )  $\delta$  7.37 – 7.17 (m, 10H), 6.79 (s, 1H), 6.58 (d,  $J$  = 8.3 Hz, 1H), 6.46 (dd,  $J$  = 8.3, 2.6 Hz, 1H), 5.30 (s, 1H), 4.81 (d,  $J$  = 16.8 Hz, 1H), 4.10 (d,  $J$  = 16.8 Hz, 1H), 3.77 (s, 3H), 2.81 (hept,  $J$  = 6.6 Hz, 1H), 1.29 (d,  $J$  = 6.8 Hz, 3H), 1.25 (d,  $J$  = 6.7 Hz, 3H);  $^{13}\text{C}$  NMR (101 MHz,  $\text{CDCl}_3$ )  $\delta$  162.9, 159.6, 144.4, 142.5, 136.9, 128.9, 128.8, 127.9, 127.6, 126.9, 126.7, 126.5, 117.1, 111.6, 108.2, 62.4, 55.2, 51.0, 30.6, 20.9, 20.2; IR (neat): 3027, 2963, 1588, 1554, 1493, 1426, 1148, 1031  $\text{cm}^{-1}$ ; HRMS (ESI):  $m/z$  calcd for  $\text{C}_{25}\text{H}_{27}\text{N}_2\text{O}$  [M+H], 371.2123; found, 371.2110.

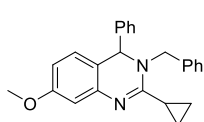

**3-Benzyl-2-cyclopropyl-7-methoxy-4-phenyl-3,4-dihydroquinazoline (4l).**

Prepared according to the general 3,4-dihydroquinazoline synthesis protocol with **3l** (0.191 g, 1.00 mmol), benzylamine (0.12 mL, 1.1 mmol), benzaldehyde (0.11 mL, 1.1 mmol),  $\text{CH}_2\text{Cl}_2$  (10.0 mL), 2-chloropyridine (0.11 mL, 1.2 mmol), and  $\text{Ti}_2\text{O}$  (0.18 mL, 1.1 mmol). The reaction proceeded for 24 h at rt after addition of  $\text{Ti}_2\text{O}$  and was worked up as described above. The residue was passed through a silica plug (90:10:0.5 EtOAc:hexanes:TEA as

eluent) and the concentrated filtrate was further purified by flash chromatography (20% EtOAc in hexanes as eluent) to afford the desired product (0.234 g, 64% yield) as a solid (m.p. = 126 - 130 °C). <sup>1</sup>H NMR (400 MHz, CDCl<sub>3</sub>) δ 7.36 – 7.17 (m, 10H), 6.71 (d, *J* = 2.7 Hz, 1H), 6.58 (d, *J* = 8.4 Hz, 1H), 6.44 (dd, *J* = 8.4, 2.6 Hz, 1H), 5.34 (s, 1H), 5.21 (d, *J* = 16.4 Hz, 1H), 4.14 (d, *J* = 16.4 Hz, 1H), 3.73 (s, 3H), 1.66 (tt, *J* = 8.3, 5.0 Hz, 1H), 1.30 – 1.24 (m, 1H), 1.04 – 0.94 (m, 1H), 0.89 – 0.75 (m, 2H); <sup>13</sup>C NMR (101 MHz, CDCl<sub>3</sub>) δ 159.6, 158.9, 144.1, 142.5, 136.8, 128.9, 127.9, 127.5, 126.94, 126.91, 126.8, 117.2, 111.4, 108.1, 62.0, 55.2, 51.2, 14.1, 7.5, 6.0; IR (neat): 3004, 2932, 1591, 1549, 1493, 1428, 1150, 1029 cm<sup>-1</sup>; HRMS (ESI): *m/z* calcd for C<sub>25</sub>H<sub>25</sub>N<sub>2</sub>O [M+H], 369.1967; found, 369.1968.

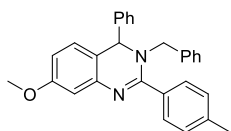

### 3-Benzyl-7-methoxy-4-phenyl-2-(p-tolyl)-3,4-dihydroquinazoline (4m).

Prepared according to the general 3,4-dihydroquinazoline synthesis protocol with **3m** (0.242 g, 1.00 mmol), benzylamine (0.12 mL, 1.1 mmol), benzaldehyde (0.11 mL, 1.1 mmol), CH<sub>2</sub>Cl<sub>2</sub> (10.0 mL), 2-chloropyridine (0.11 mL, 1.2 mmol), and Tf<sub>2</sub>O (0.18 mL, 1.1 mmol). The reaction proceeded for 24 h at rt after addition of Tf<sub>2</sub>O and was worked up as described above. The residue was passed through a silica plug (90:10:0.5 EtOAc:hexanes:TEA as eluent) and the concentrated filtrate was further purified by flash chromatography (30% EtOAc in hexanes as eluent) to afford the desired product (0.355 g, 85% yield) as a solid (m.p. = 152 – 155 °C). <sup>1</sup>H NMR (400 MHz, CDCl<sub>3</sub>) δ 7.41 (d, *J* = 8.1 Hz, 2H), 7.38 – 7.21 (m, 8H), 7.18 (d, *J* = 7.8 Hz, 4H), 6.89 (d, *J* = 2.6 Hz, 1H), 6.60 (d, *J* = 8.5 Hz, 1H), 6.50 (dd, *J* = 8.4, 2.6 Hz, 1H), 5.36 (s, 1H), 4.74 (d, *J* = 15.7 Hz, 1H), 3.98 (d, *J* = 15.7 Hz, 1H), 3.75 (s, 3H), 2.33 (s, 3H); <sup>13</sup>C NMR (101 MHz, CDCl<sub>3</sub>) δ 159.7, 158.4, 144.1, 142.5, 139.3, 136.7, 133.7, 129.3, 129.0, 128.9, 128.1, 128.0, 127.7, 127.3, 127.2, 126.9, 117.2, 112.1, 108.7, 60.5, 55.3, 53.4, 21.4; IR (neat): 3025, 2922, 1586, 1545, 1493, 1420, 1262, 1124, 1034 cm<sup>-1</sup>; HRMS (ESI): *m/z* calcd for C<sub>29</sub>H<sub>27</sub>N<sub>2</sub>O [M+H], 419.2123; found, 419.2104.

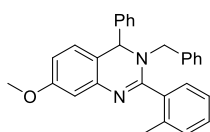

### 3-Benzyl-7-methoxy-4-phenyl-2-(o-tolyl)-3,4-dihydroquinazoline (4n).

Prepared according to the general 3,4-dihydroquinazoline synthesis protocol with **3n** (0.245 g, 1.02 mmol), benzylamine (0.12 mL, 1.1 mmol), benzaldehyde (0.11 mL, 1.1 mmol), CH<sub>2</sub>Cl<sub>2</sub> (10.0 mL), 2-chloropyridine (0.11 mL, 1.2 mmol), and Tf<sub>2</sub>O (0.18 mL, 1.1 mmol). The reaction proceeded for 24 h at rt after addition of Tf<sub>2</sub>O and was worked up as described above. The residue was passed through a silica plug (90:10:0.5 EtOAc:hexanes:TEA as eluent) and the concentrated filtrate was further purified by flash chromatography (30% EtOAc in hexanes as eluent) to afford the desired product (0.205 g, 48% yield) as a solid (m.p. = 137 – 139 °C). <sup>1</sup>H NMR (400 MHz, DMSO-d<sub>6</sub>, heated to 330 K) δ 7.45 – 7.20 (m, 12H), 7.17 (d, *J* = 7.1 Hz, 2H), 6.74 (d, *J* = 8.4 Hz, 1H), 6.68 (d, *J* = 2.6 Hz, 1H), 6.56 (dd, *J* = 8.3, 2.6 Hz, 1H), 5.50 (s, 1H), 4.28 (d, *J* = 16.0 Hz, 1H), 4.04 (d, *J* = 15.9 Hz, 1H), 3.74 (s, 3H), 2.14 (s, 3H); <sup>13</sup>C NMR (101 MHz, DMSO-d<sub>6</sub>, heated to 330 K) δ 159.1, 156.7, 143.2, 142.5, 136.2, 135.5, 135.3, 130.0, 128.54, 128.52, 128.45, 127.7, 127.3, 127.0, 126.9, 126.8, 125.5, 116.8, 110.9, 108.5, 59.9, 54.8, 51.6, 18.4; IR (neat): 3029, 2932, 1589, 1552, 1489, 1454, 1258, 1135, 1034 cm<sup>-1</sup>; HRMS (ESI): *m/z* calcd for C<sub>29</sub>H<sub>27</sub>N<sub>2</sub>O [M+H], 419.2123; found, 419.2104.

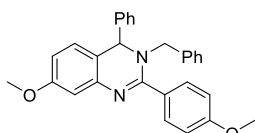

### 3-Benzyl-7-methoxy-2-(p-methoxyphenyl)-4-phenyl-3,4-dihydroquinazoline (4o).

Prepared according to the general 3,4-dihydroquinazoline synthesis protocol with **3o** (0.257 g, 1.00 mmol), benzylamine (0.12 mL, 1.1 mmol), benzaldehyde (0.11 mL, 1.1 mmol), CH<sub>2</sub>Cl<sub>2</sub> (10.0 mL), 2-chloropyridine (0.11 mL, 1.2 mmol), and Tf<sub>2</sub>O (0.18 mL, 1.1 mmol). The reaction proceeded for 24 h at rt after addition of Tf<sub>2</sub>O and was worked up as described above. The residue was passed through a silica plug (90:10:0.5 EtOAc:hexanes:TEA as eluent) and the concentrated filtrate was further purified by flash chromatography (30% EtOAc in hexanes as eluent) to afford the desired product (0.297 g, 68% yield) as solid (m.p. = 78 - 81 °C). <sup>1</sup>H NMR (400 MHz, CDCl<sub>3</sub>) δ 7.46 (d, *J* = 8.7 Hz, 2H), 7.39 – 7.21 (m, 8H), 7.18 (d, *J* = 6.7 Hz, 2H), 6.93 – 6.87 (m, 3H), 6.61 (d, *J* = 8.4 Hz, 1H), 6.50 (dd, *J* = 8.4, 2.6 Hz, 1H), 5.35 (s, 1H), 4.79 (d, *J* = 15.7 Hz, 1H), 4.02 (d, *J* = 15.6 Hz, 1H), 3.76 (s, 3H), 3.75 (s, 3H); <sup>13</sup>C NMR (101 MHz, CDCl<sub>3</sub>) δ 160.5, 159.6, 158.0, 144.0, 142.6, 136.7, 129.6, 129.0, 128.8, 128.0, 127.7, 127.2, 127.0, 126.8, 117.3, 114.0, 112.0, 108.5, 60.5, 55.3, 55.2, 53.5; IR (neat): 3027, 2935, 1608, 1543, 1493, 1422, 1251, 1172, 1123, 1031 cm<sup>-1</sup>; HRMS (ESI): *m/z* calcd for C<sub>29</sub>H<sub>27</sub>N<sub>2</sub>O<sub>2</sub> [M+H], 435.2073; found, 435.2084.

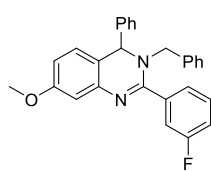

**3-Benzyl-2-(m-fluorophenyl)-7-methoxy-4-phenyl-3,4-dihydroquinazoline (4p).** Prepared according to the general 3,4-dihydroquinazoline synthesis protocol with **3p** (0.243 g, 0.99 mmol), benzylamine (0.12 mL, 1.1 mmol), benzaldehyde (0.11 mL, 1.1 mmol), CH<sub>2</sub>Cl<sub>2</sub> (10.0 mL), 2-chloropyridine (0.11 mL, 1.2 mmol), and Tf<sub>2</sub>O (0.18 mL, 1.1 mmol). The reaction proceeded for 24 h at rt after addition of Tf<sub>2</sub>O and was worked up as described above. The residue was passed through a silica plug (90:10:0.5 EtOAc:hexanes:TEA as eluent) and the concentrated filtrate was further purified by flash chromatography (20% EtOAc in hexanes as eluent) to afford the desired product (0.270 g, 65% yield) of the title compound as a solid (m.p. = 142 - 145 °C). <sup>1</sup>H NMR (400 MHz, CDCl<sub>3</sub>) δ 7.39 – 7.15 (m, 13H), 7.07 (tdd, *J* = 8.4, 2.7, 1.2 Hz, 1H), 6.88 (d, *J* = 2.6 Hz, 1H), 6.62 (d, *J* = 8.4 Hz, 1H), 6.53 (dd, *J* = 8.4, 2.6 Hz, 1H), 5.37 (s, 1H), 4.65 (d, *J* = 15.7 Hz, 1H), 4.01 (d, *J* = 15.7 Hz, 1H), 3.76 (s, 3H); <sup>13</sup>C NMR (101 MHz, CDCl<sub>3</sub>) δ 162.7 (d, <sup>1</sup>*J*<sub>C-F</sub> = 248 Hz), 159.7, 156.8 (d, <sup>4</sup>*J*<sub>C-F</sub> = 3 Hz), 143.8, 142.1, 138.7 (d, <sup>3</sup>*J*<sub>C-F</sub> = 7 Hz), 136.3, 130.4 (d, <sup>3</sup>*J*<sub>C-F</sub> = 8 Hz), 129.1, 128.9, 128.2, 127.9, 127.24, 127.22, 126.9, 123.7 (d, <sup>4</sup>*J*<sub>C-F</sub> = 3 Hz), 117.1, 116.4 (d, <sup>2</sup>*J*<sub>C-F</sub> = 21 Hz), 115.4 (d, <sup>2</sup>*J*<sub>C-F</sub> = 23 Hz), 112.5, 108.8, 60.5, 55.2, 53.3; IR (neat): 3029, 2937, 1586, 1549, 1487, 1457, 1271, 1150, 1049 cm<sup>-1</sup>; HRMS (ESI): *m/z* calcd for C<sub>28</sub>H<sub>24</sub>FN<sub>2</sub>O [M+H], 423.1873; found, 423.1873.

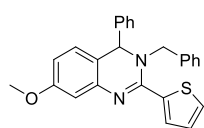

**3-Benzyl-7-methoxy-4-phenyl-2-(2-thienyl)-3,4-dihydroquinazoline (4q).**

Prepared according to the general 3,4-dihydroquinazoline synthesis protocol with **3q** (0.233 g, 1.00 mmol), benzylamine (0.12 mL, 1.1 mmol), benzaldehyde (0.11 mL, 1.1 mmol), CH<sub>2</sub>Cl<sub>2</sub> (10.0 mL), 2-chloropyridine (0.11 mL, 1.2 mmol), and Tf<sub>2</sub>O (0.18 mL, 1.1 mmol). The reaction proceeded for 24 h at rt after addition of Tf<sub>2</sub>O and was worked up as described above. The residue was passed through a silica plug (90:10:0.5 EtOAc:hexanes:TEA as eluent) and the concentrated filtrate was further purified by flash chromatography (30% EtOAc in hexanes as eluent) to afford the desired product (0.213 g, 52% yield) as a solid (m.p. = 143 - 148 °C). <sup>1</sup>H NMR (400 MHz, CDCl<sub>3</sub>) δ 7.39 (dd, *J* = 5.0, 1.2 Hz, 1H), 7.35 – 7.20 (m, 11H), 7.02 (dd, *J* = 5.1, 3.6 Hz, 1H), 6.87 (d, *J* = 2.6 Hz, 1H), 6.64 (d, *J* = 8.4 Hz, 1H), 6.54 (dd, *J* = 8.4, 2.6 Hz, 1H), 5.35 (s, 1H), 5.15 (d, *J* = 15.6 Hz, 1H), 4.19 (d, *J* = 15.6 Hz, 1H), 3.77 (s, 3H); <sup>13</sup>C NMR (101 MHz, CDCl<sub>3</sub>) δ 159.7, 152.4, 143.6, 142.3, 138.4, 136.6, 129.0, 128.9, 128.4, 128.0, 127.9, 127.8, 127.4, 127.0, 126.9, 126.7, 117.4, 112.5, 108.5, 60.8, 55.3, 53.9; IR (neat): 3027, 2928, 1584, 1541, 1491, 1275, 1150, 1030 cm<sup>-1</sup>; HRMS (ESI): *m/z* calcd for C<sub>26</sub>H<sub>23</sub>N<sub>2</sub>OS [M+H], 411.1531; found, 411.1513.

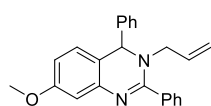

**3-Allyl-7-methoxy-2,4-diphenyl-3,4-dihydroquinazoline (5a).**

Prepared according to the general 3,4-dihydroquinazoline synthesis protocol with **1** (0.227 g, 1.00 mmol), allylamine (0.080 mL, 1.1 mmol), benzaldehyde (0.11 mL, 1.1 mmol), CH<sub>2</sub>Cl<sub>2</sub> (10.0 mL), 2-chloropyridine (0.11 mL, 1.2 mmol), and Tf<sub>2</sub>O (0.18 mL, 1.1 mmol). The reaction proceeded for 24 h at rt after addition of Tf<sub>2</sub>O and was worked up as described above. The residue was passed through a silica plug (90:10:0.5 EtOAc:hexanes:TEA as eluent) and the concentrated filtrate was further purified by flash chromatography (35% EtOAc in hexanes as eluent) to afford the desired product (0.213 g, 61% yield) as an oil. <sup>1</sup>H NMR (400 MHz, CDCl<sub>3</sub>) δ 7.50 – 7.43 (m, 2H), 7.41 – 7.36 (m, 5H), 7.38 – 7.29 (m, 2H), 7.29 – 7.24 (m, 1H), 6.86 (d, *J* = 2.6 Hz, 1H), 6.76 (d, *J* = 8.4 Hz, 1H), 6.58 (dd, *J* = 8.4, 2.6 Hz, 1H), 5.64 (dddd, *J* = 17.2, 9.9, 7.2, 4.1 Hz, 1H), 5.55 (s, 1H), 5.24 – 5.20 (m, 1H), 5.19 (t, *J* = 1.5 Hz, 1H), 3.99 (ddt, *J* = 16.1, 4.0, 1.9 Hz, 1H), 3.76 (s, 3H), 3.52 (ddt, *J* = 16.1, 7.3, 1.3 Hz, 1H); <sup>13</sup>C NMR (101 MHz, CDCl<sub>3</sub>) δ 159.7, 158.1, 144.3, 142.5, 136.5, 133.0, 129.3, 129.0, 128.5, 128.0, 127.9, 127.1, 126.8, 118.2, 117.3, 112.3, 108.6, 60.6, 55.3, 52.8; IR (neat): 3062, 2954, 1586, 1547, 1491, 1265, 1139, 1034 cm<sup>-1</sup>; HRMS (ESI): *m/z* calcd for C<sub>24</sub>H<sub>23</sub>N<sub>2</sub>O [M+H], 355.1810; found, 355.1802.

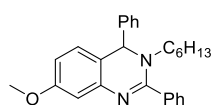

**3-Hexyl-7-methoxy-2,4-diphenyl-3,4-dihydroquinazoline (5b).**

Prepared according to the general 3,4-dihydroquinazoline synthesis protocol with **1** (0.229 g, 1.01 mmol), hexylamine (0.14 mL, 1.1 mmol), benzaldehyde (0.11 mL, 1.1 mmol), CH<sub>2</sub>Cl<sub>2</sub> (10.0 mL), 2-chloropyridine (0.11 mL, 1.2 mmol), and Tf<sub>2</sub>O (0.18 mL, 1.1 mmol). The reaction proceeded for 24 h at rt after addition of Tf<sub>2</sub>O and was worked up as described above. The residue was passed through a silica plug (90:10:0.5 EtOAc:hexanes:TEA as eluent) and the concentrated filtrate was further purified by flash chromatography (30% EtOAc in hexanes as eluent) to

afford the desired product (0.171 g, 43% yield) as an oil.  $^1\text{H}$  NMR (400 MHz,  $\text{CDCl}_3$ )  $\delta$  7.49 – 7.43 (m, 2H), 7.43 – 7.37 (m, 5H), 7.36 – 7.31 (m, 2H), 7.29 – 7.24 (m, 1H), 6.84 (d,  $J$  = 2.6 Hz, 1H), 6.79 (d,  $J$  = 8.5 Hz, 1H), 6.58 (dd,  $J$  = 8.4, 2.6 Hz, 1H), 5.55 (s, 1H), 3.77 (s, 3H), 3.32 (ddd,  $J$  = 14.3, 8.9, 7.2 Hz, 1H), 2.98 (ddd,  $J$  = 14.0, 8.8, 4.9 Hz, 1H), 1.60 – 1.40 (m, 2H), 1.21 – 1.00 (m, 6H), 0.78 (t,  $J$  = 7.2 Hz, 3H);  $^{13}\text{C}$  NMR (101 MHz,  $\text{CDCl}_3$ )  $\delta$  159.7, 158.4, 144.8, 142.7, 136.9, 129.2, 129.0, 128.5, 128.0, 127.9, 126.9, 126.5, 117.4, 112.1, 108.4, 61.4, 55.3, 50.3, 31.2, 27.9, 26.0, 22.4, 13.9; IR (neat): 2930, 1586, 1545, 1491, 1273, 1142  $\text{cm}^{-1}$ ; HRMS (ESI):  $m/z$  calcd for  $\text{C}_{27}\text{H}_{31}\text{N}_2\text{O}$  [ $\text{M}+\text{H}$ ], 399.2436; found, 399.2437.

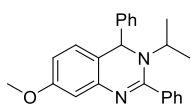

**3-Isopropyl-7-methoxy-2,4-diphenyl-3,4-dihydroquinazoline (5c).** Prepared according to the general 3,4-dihydroquinazoline synthesis protocol with **1** (0.228 g, 1.00 mmol), isopropylamine (0.095 mL, 1.1 mmol), benzaldehyde (0.11 mL, 1.1 mmol),  $\text{CH}_2\text{Cl}_2$  (10.0 mL), 2-chloropyridine (0.11 mL, 1.2 mmol), and  $\text{Tf}_2\text{O}$  (0.18 mL, 1.1 mmol). The reaction proceeded for 48 h at rt after addition of  $\text{Tf}_2\text{O}$  and was worked up as described above. The residue was purified by flash chromatography (0% - 1% methanol in 96:4  $\text{CH}_2\text{Cl}_2$ :ether mixture as eluent) to afford the desired product (0.141 g, 39% yield) as an oil.  $^1\text{H}$  NMR (400 MHz,  $\text{CDCl}_3$ )  $\delta$  7.73 – 7.66 (m, 2H), 7.48 – 7.38 (m, 5H), 7.27 (t,  $J$  = 7.8 Hz, 2H), 7.19 (t,  $J$  = 7.3 Hz, 1H), 6.97 (d,  $J$  = 8.3 Hz, 1H), 6.87 (d,  $J$  = 2.6 Hz, 1H), 6.63 (dd,  $J$  = 8.3, 2.6 Hz, 1H), 5.56 (s, 1H), 4.09 (hept,  $J$  = 6.7 Hz, 1H), 3.77 (s, 3H), 1.13 (dd,  $J$  = 9.4, 6.7 Hz, 6H);  $^{13}\text{C}$  NMR (101 MHz,  $\text{CDCl}_3$ )  $\delta$  159.6, 159.2, 146.7, 143.1, 137.3, 129.9, 128.9, 128.6, 128.4, 127.3, 126.1, 125.4, 119.1, 112.3, 108.5, 55.7, 55.3, 52.3, 22.2, 21.5; IR (neat): 3058, 2930, 1584, 1536, 1489, 1273, 1165, 1109, 1031  $\text{cm}^{-1}$ ; HRMS (ESI):  $m/z$  calcd for  $\text{C}_{24}\text{H}_{25}\text{N}_2\text{O}$  [ $\text{M}+\text{H}$ ], 357.1967; found, 357.1982.

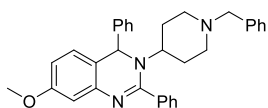

**3-(1-Benzyl-4-piperidyl)-7-methoxy-2,4-diphenyl-3,4-dihydroquinazoline (5d).** Prepared according to the general 3,4-dihydroquinazoline synthesis protocol with **1** (0.230 g, 1.01 mmol), 4-amino-1-benzylpiperidine (0.22 mL, 1.1 mmol), benzaldehyde (0.11 mL, 1.1 mmol),  $\text{CH}_2\text{Cl}_2$  (10.0 mL), 2-chloropyridine (0.11 mL, 1.2 mmol), and  $\text{Tf}_2\text{O}$  (0.18 mL, 1.1 mmol). The reaction proceeded for 24 h at rt after addition of  $\text{Tf}_2\text{O}$  and was worked up as described above. The residue was passed through a silica plug (90:10:0.5 EtOAc:hexanes:TEA as eluent) and the concentrated filtrate was further purified by flash chromatography (25% EtOAc in hexanes as eluent) to afford the desired product (0.422 g, 85% yield) as a solid (m.p. = 84 - 86  $^\circ\text{C}$ ).  $^1\text{H}$  NMR (400 MHz,  $\text{CDCl}_3$ )  $\delta$  7.72 – 7.66 (m, 2H), 7.52 – 7.34 (m, 5H), 7.32 – 7.11 (m, 8H), 6.95 (d,  $J$  = 8.3 Hz, 1H), 6.87 (d,  $J$  = 2.6 Hz, 1H), 6.64 (dd,  $J$  = 8.3, 2.6 Hz, 1H), 5.63 (s, 1H), 3.75 (s, 3H), 3.67 – 3.55 (m, 1H), 3.36 (d,  $J$  = 2.6 Hz, 2H), 2.80 (ddd,  $J$  = 11.5, 5.6, 3.0 Hz, 2H), 2.00 (qd,  $J$  = 12.1, 4.1 Hz, 1H), 1.86 (qd,  $J$  = 12.2, 3.9 Hz, 1H), 1.78 – 1.62 (m, 3H), 1.42 (ddd,  $J$  = 12.6, 4.3, 2.3 Hz, 1H);  $^{13}\text{C}$  NMR (101 MHz,  $\text{CDCl}_3$ )  $\delta$  159.6, 159.1, 146.2, 143.0, 137.9, 136.9, 130.0, 129.1, 128.8, 128.6, 128.3, 128.2, 127.3, 127.1, 126.0, 125.4, 119.1, 112.3, 108.5, 62.8, 59.1, 56.5, 55.2, 52.82, 52.79, 32.0, 30.9; IR (neat): 3027, 2943, 1584, 1539, 1489, 1446, 1269, 1133, 1031  $\text{cm}^{-1}$ ; HRMS (ESI):  $m/z$  calcd for  $\text{C}_{33}\text{H}_{34}\text{N}_3\text{O}$  [ $\text{M}+\text{H}$ ], 488.2702; found, 488.2675.

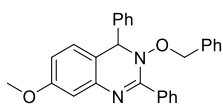

**3-(Benzyloxy)-7-methoxy-2,4-diphenyl-3,4-dihydroquinazoline (5f).** Prepared according to the general 3,4-dihydroquinazoline synthesis protocol with **1** (0.228 g, 1.00 mmol), O-benzyl hydroxylamine (0.175 g, 1.10 mmol), benzaldehyde (0.11 mL, 1.1 mmol),  $\text{CH}_2\text{Cl}_2$  (10.0 mL), 2-chloropyridine (0.11 mL, 1.2 mmol), and  $\text{Tf}_2\text{O}$  (0.18 mL, 1.1 mmol). The reaction proceeded for 24 h at rt after addition of  $\text{Tf}_2\text{O}$  and was worked up as described above. The residue was passed through a silica plug (90:10:0.5 EtOAc:hexanes:TEA as eluent) and the concentrated filtrate was further purified by flash chromatography (3% ether in  $\text{CH}_2\text{Cl}_2$  as eluent) to afford the desired product (0.234 g, 56% yield) as an oil.  $^1\text{H}$  NMR (400 MHz,  $\text{CDCl}_3$ )  $\delta$  7.57 (dd,  $J$  = 8.2, 1.5 Hz, 2H), 7.41 – 7.23 (m, 8H), 7.23 – 7.10 (m, 3H), 6.91 (d,  $J$  = 2.6 Hz, 1H), 6.78 (d,  $J$  = 6.9 Hz, 2H), 6.68 (d,  $J$  = 8.5 Hz, 1H), 6.57 (dd,  $J$  = 8.4, 2.6 Hz, 1H), 5.72 (s, 1H), 4.50 (d,  $J$  = 9.9 Hz, 1H), 4.26 (d,  $J$  = 9.9 Hz, 1H), 3.75 (s, 3H);  $^{13}\text{C}$  NMR (101 MHz,  $\text{CDCl}_3$ )  $\delta$  159.9, 158.0, 142.2, 141.8, 134.3, 134.2, 129.5, 129.4, 128.8, 128.6, 128.6, 128.3, 128.1, 127.8, 127.3, 120.1, 112.3, 109.4, 76.7, 64.2, 55.3; IR (neat): 3062, 2935, 1672, 1586, 1541, 1493, 1456, 1271, 1031  $\text{cm}^{-1}$ ; HRMS (ESI):  $m/z$  calcd for  $\text{C}_{28}\text{H}_{25}\text{N}_2\text{O}_2$  [ $\text{M}+\text{H}$ ], 421.1916; found, 421.1900.

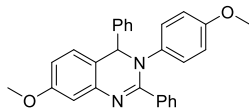

**7-Methoxy-3-(p-methoxyphenyl)-2,4-diphenyl-3,4-dihydroquinazoline (5g).**

Prepared according to the general 3,4-dihydroquinazoline synthesis protocol with **1** (0.228 g, 1.00 mmol), *p*-anisidine (0.137 g, 1.1 mmol), benzaldehyde (0.11 mL, 1.1 mmol), CH<sub>2</sub>Cl<sub>2</sub> (10.0 mL), 2-chloropyridine (0.11 mL, 1.2 mmol), and Tf<sub>2</sub>O (0.18 mL, 1.1 mmol). The reaction proceeded for 24 h at rt after addition of Tf<sub>2</sub>O and was worked up as described above. The residue was purified by flash chromatography (20% EtOAc in hexanes as eluent) to afford the desired product (0.372 g, 88% yield) as a solid (m.p. = 154 – 157 °C). <sup>1</sup>H NMR (400 MHz, CDCl<sub>3</sub>) δ 7.60 (dd, *J* = 7.5, 2.2 Hz, 2H), 7.46 (d, *J* = 7.2 Hz, 2H), 7.31 (t, *J* = 7.4 Hz, 2H), 7.27 – 7.17 (m, 4H), 6.99 (d, *J* = 2.6 Hz, 1H), 6.90 (d, *J* = 8.4 Hz, 1H), 6.81 (d, *J* = 9.0 Hz, 2H), 6.66 (dd, *J* = 8.4, 2.6 Hz, 1H), 6.59 (d, *J* = 9.0 Hz, 2H), 5.71 (s, 1H), 3.79 (s, 3H), 3.63 (s, 3H); <sup>13</sup>C NMR (101 MHz, CDCl<sub>3</sub>) δ 159.7, 156.8, 155.6, 145.4, 142.2, 139.4, 136.7, 129.5, 129.3, 129.2, 128.0, 127.8, 126.4, 126.2, 125.7, 118.7, 113.8, 112.7, 108.9, 66.2, 55.3, 55.3; IR (neat): 3058, 2954, 1588, 1543, 1508, 1491, 1247, 1034 cm<sup>-1</sup>; HRMS (ESI): *m/z* calcd for C<sub>28</sub>H<sub>25</sub>N<sub>2</sub>O<sub>2</sub> [M+H], 421.1916; found, 421.1913.

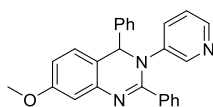

**7-Methoxy-2,4-diphenyl-3-(3-pyridyl)-3,4-dihydroquinazoline (5h).**

Prepared according to the general 3,4-dihydroquinazoline synthesis protocol with **1** (0.232 g, 1.02 mmol), 3-aminopyridine (0.107 g, 1.14 mmol), benzaldehyde (0.11 mL, 1.1 mmol), CH<sub>2</sub>Cl<sub>2</sub> (10.0 mL), 2-chloropyridine (0.11 mL, 1.2 mmol), and Tf<sub>2</sub>O (0.18 mL, 1.1 mmol). The reaction proceeded for 24 h at rt after addition of Tf<sub>2</sub>O and was worked up as described above. The residue was purified by flash chromatography (30% EtOAc in hexanes as eluent) to afford the desired product (0.230 g, 56% yield) as a solid (m.p. = 148 – 152 °C). <sup>1</sup>H NMR (400 MHz, CDCl<sub>3</sub>) δ 8.28 (d, *J* = 2.8 Hz, 1H), 8.21 (dd, *J* = 4.7, 1.4 Hz, 1H), 7.60 (dd, *J* = 6.6, 1.7 Hz, 2H), 7.49 (d, *J* = 7.1 Hz, 2H), 7.35 (t, *J* = 7.3 Hz, 2H), 7.31 – 7.22 (m, 4H), 7.19 (ddd, *J* = 8.2, 2.7, 1.5 Hz, 1H), 7.05 – 7.00 (m, 2H), 6.97 (d, *J* = 8.4 Hz, 1H), 6.72 (dd, *J* = 8.4, 2.6 Hz, 1H), 5.79 (s, 1H), 3.83 (s, 3H); <sup>13</sup>C NMR (101 MHz, CDCl<sub>3</sub>) δ 159.9, 154.6, 145.5, 145.4, 144.5, 142.6, 141.7, 135.7, 130.9, 130.1, 129.7, 129.4, 128.5, 128.2, 126.5, 125.6, 123.1, 118.7, 113.4, 109.4, 65.7, 55.4; IR (neat): 3030, 1590, 1549, 1491, 1325, 1273, 1046 cm<sup>-1</sup>; HRMS (ESI): *m/z* calcd for C<sub>26</sub>H<sub>22</sub>N<sub>3</sub>O [M+H], 392.1763; found, 392.1754.

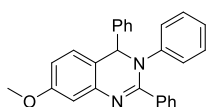

**7-Methoxy-2,3,4-triphenyl-3,4-dihydroquinazoline (5i).**

Prepared according to the general 3,4-dihydroquinazoline synthesis protocol with **1** (0.227 g, 1.00 mmol), aniline (0.10 mL, 1.1 mmol), benzaldehyde (0.11 mL, 1.1 mmol), CH<sub>2</sub>Cl<sub>2</sub> (10.0 mL), 2-fluoropyridine (0.10 mL, 1.2 mmol) instead of 2-chloropyridine, and Tf<sub>2</sub>O (0.18 mL, 1.1 mmol). The reaction proceeded for 48 h at rt after addition of Tf<sub>2</sub>O and was worked up as described above. The residue was passed through a silica plug (90:10:0.5 EtOAc:hexanes:TEA as eluent) and the concentrated filtrate was further purified by flash chromatography (1% ether in CH<sub>2</sub>Cl<sub>2</sub> as eluent) to afford the desired product (0.208 g, 53% yield) as a solid (m.p. = 131 – 134 °C). <sup>1</sup>H NMR (400 MHz, CDCl<sub>3</sub>) δ 7.64 (dt, *J* = 7.8, 1.3 Hz, 2H), 7.49 (dd, *J* = 8.2, 1.3 Hz, 2H), 7.33 (t, *J* = 7.4 Hz, 2H), 7.30 – 7.20 (m, 4H), 7.09 (t, *J* = 7.8 Hz, 2H), 7.02 (d, *J* = 2.6 Hz, 1H), 6.98 (t, *J* = 8.4 Hz, 2H), 6.92 (d, *J* = 7.6 Hz, 2H), 6.70 (dd, *J* = 8.3, 2.6 Hz, 1H), 5.81 (s, 1H), 3.82 (s, 3H); <sup>13</sup>C NMR (101 MHz, CDCl<sub>3</sub>) δ 159.7, 155.5, 146.2, 145.1, 142.0, 136.4, 130.9, 129.6, 129.2, 128.7, 128.1, 127.9, 126.4, 125.6, 124.7, 124.4, 119.0, 112.9, 109.0, 65.8, 55.4; IR (neat): 3058, 2956, 1586, 1541, 1489, 1273, 1126, 1031 cm<sup>-1</sup>; HRMS (ESI): *m/z* calcd for C<sub>27</sub>H<sub>23</sub>N<sub>2</sub>O [M+H], 391.1810; found, 391.1791.

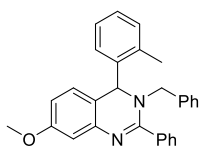

**3-Benzyl-7-methoxy-2-phenyl-4-(o-tolyl)-3,4-dihydroquinazoline (5j).**

Prepared according to the general 3,4-dihydroquinazoline synthesis protocol with **1** (0.227 g, 1.00 mmol), benzylamine (0.12 mL, 1.1 mmol), o-tolualdehyde (0.13 mL, 1.1 mmol), CH<sub>2</sub>Cl<sub>2</sub> (10.0 mL), 2-chloropyridine (0.11 mL, 1.2 mmol), and Tf<sub>2</sub>O (0.18 mL, 1.1 mmol). The reaction proceeded for 24 h at rt after addition of Tf<sub>2</sub>O and was worked up as described above. The residue was passed through a silica plug (90:10:0.5 EtOAc:hexanes:TEA as eluent) and the concentrated filtrate was further purified by flash chromatography (30% EtOAc in hexanes as eluent) to afford the desired product (0.262 g, 63% yield) as a solid (m.p. = 65 – 69 °C). <sup>1</sup>H NMR (400 MHz, CDCl<sub>3</sub>) δ 7.57 – 7.52 (m, 2H), 7.45 – 7.34 (m, 4H), 7.34 – 7.13 (m, 8H), 6.85 (d, *J* = 2.5 Hz, 1H), 6.53 (d, *J* = 8.4 Hz, 1H), 6.47 (dd, *J* = 8.4, 2.6 Hz, 1H), 5.80 (s, 1H), 4.70 (d, *J* = 16.0 Hz, 1H), 3.83 (d, *J* = 16.0 Hz, 1H), 3.75 (s, 3H), 2.30 (s, 3H); <sup>13</sup>C NMR

(101 MHz, CDCl<sub>3</sub>)  $\delta$  159.5, 158.5, 142.4, 142.3, 136.7, 136.6, 134.9, 131.1, 129.2, 129.1, 128.8, 128.7, 127.9, 127.8, 127.7, 127.1, 126.9, 126.8, 117.0, 112.1, 108.7, 57.8, 55.2, 53.0, 19.3; IR (neat): 3023, 2924, 1586, 1547, 1491, 1444, 1424, 1258, 1154, 1129, 1032 cm<sup>-1</sup>; HRMS (ESI):  $m/z$  calcd for C<sub>29</sub>H<sub>27</sub>N<sub>2</sub>O [M+H], 419.2123; found, 419.2098.

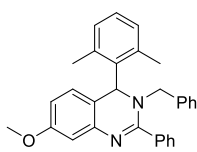

**3-Benzyl-7-methoxy-2-phenyl-4-(2,6-xylyl)-3,4-dihydroquinazoline (5k).**

Prepared according to the general 3,4-dihydroquinazoline synthesis protocol with **1** (0.227 g, 1.00 mmol), benzylamine (0.12 mL, 1.1 mmol), 2,6-dimethylbenzaldehyde (0.15 mL, 1.1 mmol), CH<sub>2</sub>Cl<sub>2</sub> (10.0 mL), 2-chloropyridine (0.11 mL, 1.2 mmol), and Tf<sub>2</sub>O (0.18 mL, 1.1 mmol). The reaction proceeded for 48 h at rt after addition of Tf<sub>2</sub>O and was worked up as described above. The residue was passed through a silica plug (90:10:0.5 EtOAc:hexanes:TEA as eluent) and the concentrated filtrate was further purified by flash chromatography (40% EtOAc in hexanes as eluent) to afford the desired product (0.167 g, 39% yield) as a solid (m.p. = 63 – 66 °C). <sup>1</sup>H NMR (400 MHz, CDCl<sub>3</sub>)  $\delta$  7.59 – 7.51 (m, 2H), 7.40 – 7.22 (m, 6H), 7.17 – 7.06 (m, 4H), 6.96 (d,  $J$  = 6.8 Hz, 1H), 6.78 (d,  $J$  = 2.6 Hz, 1H), 6.43 (dd,  $J$  = 8.6, 2.6 Hz, 1H), 6.40 – 6.32 (m, 2H), 4.68 (d,  $J$  = 16.5 Hz, 1H), 3.76 (s, 3H), 3.67 (d,  $J$  = 16.5 Hz, 1H), 2.45 (s, 3H), 1.87 (s, 3H); <sup>13</sup>C NMR (101 MHz, CDCl<sub>3</sub>)  $\delta$  159.6, 158.9, 142.7, 138.6, 138.3, 136.9, 136.7, 136.3, 131.0, 129.1, 128.9, 128.7, 128.3, 127.9, 127.6, 127.4, 126.8, 126.3, 115.4, 111.9, 108.5, 56.0, 55.3, 52.3, 20.1, 19.9; IR (neat): 2922, 1588, 1551, 1493, 1154 cm<sup>-1</sup>; HRMS (ESI):  $m/z$  calcd for C<sub>30</sub>H<sub>29</sub>N<sub>2</sub>O [M+H], 433.2280; found, 433.2275.

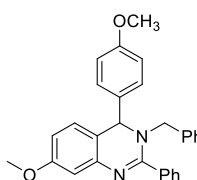

**3-Benzyl-7-methoxy-4-(p-methoxyphenyl)-2-phenyl-3,4-dihydroquinazoline (5l).**

Prepared according to the general 3,4-dihydroquinazoline synthesis protocol with **1** (0.229 g, 1.01 mmol), benzylamine (0.12 mL, 1.1 mmol), p-anisaldehyde (0.13 mL, 1.1 mmol), CH<sub>2</sub>Cl<sub>2</sub> (10.0 mL), 2-chloropyridine (0.11 mL, 1.2 mmol), and Tf<sub>2</sub>O (0.18 mL, 1.1 mmol). The reaction proceeded for 24 h at rt after addition of Tf<sub>2</sub>O and was worked up as described above. The residue was purified by flash chromatography (5% - 10% ether in CH<sub>2</sub>Cl<sub>2</sub> as eluent) to afford the desired product (0.214 g, 49% yield) as a solid (m.p. = 133 – 137 °C). <sup>1</sup>H NMR (400 MHz, CDCl<sub>3</sub>)  $\delta$  7.52 – 7.45 (m, 2H), 7.41 – 7.34 (m, 3H), 7.33 – 7.24 (m, 5H), 7.19 (d,  $J$  = 6.8 Hz, 2H), 6.88 (dd,  $J$  = 5.7, 3.0 Hz, 3H), 6.60 (d,  $J$  = 8.4 Hz, 1H), 6.52 (dd,  $J$  = 8.4, 2.6 Hz, 1H), 5.33 (s, 1H), 4.67 (d,  $J$  = 15.7 Hz, 1H), 4.01 (d,  $J$  = 15.7 Hz, 1H), 3.78 (s, 3H), 3.77 (s, 3H); <sup>13</sup>C NMR (101 MHz, CDCl<sub>3</sub>)  $\delta$  159.6, 159.4, 158.1, 142.3, 136.6, 136.6, 136.5, 129.3, 128.9, 128.6, 128.2, 127.9, 127.7, 127.3, 127.2, 117.4, 114.3, 112.2, 108.5, 59.8, 55.3, 53.1; IR (neat): 3006, 2963, 1586, 1547, 1493, 1251, 1174, 1034 cm<sup>-1</sup>; HRMS (ESI):  $m/z$  calcd for C<sub>29</sub>H<sub>27</sub>N<sub>2</sub>O<sub>2</sub> [M+H], 435.2073; found, 435.2092.

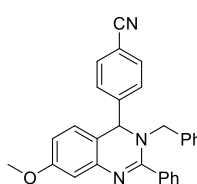

**p-(3-Benzyl-7-methoxy-2-phenyl-3,4-dihydroquinazolin-4-yl)benzonitrile (5m).**

Prepared according to the general 3,4-dihydroquinazoline synthesis protocol with **1** (0.229 g, 1.01 mmol), benzylamine (0.12 mL, 1.1 mmol), 4-cyanobenzaldehyde (0.151 g, 1.1 mmol), CH<sub>2</sub>Cl<sub>2</sub> (10.0 mL), 2-chloropyridine (0.11 mL, 1.2 mmol), and Tf<sub>2</sub>O (0.18 mL, 1.1 mmol). The reaction proceeded for 24 h at rt after addition of Tf<sub>2</sub>O and was worked up as described above. The residue was purified by flash chromatography (2% - 10% ether in CH<sub>2</sub>Cl<sub>2</sub> as eluent) to afford the desired product (0.388 g, 90% yield) as a solid (m.p. = 65 – 67 °C). <sup>1</sup>H NMR (400 MHz, (CD<sub>3</sub>)<sub>2</sub>CO)  $\delta$  7.80 (d,  $J$  = 8.4 Hz, 2H), 7.70 – 7.61 (m, 4H), 7.48 – 7.43 (m, 3H), 7.33 – 7.20 (m, 5H), 6.85 – 6.79 (m, 2H), 6.59 (dd,  $J$  = 8.4, 2.6 Hz, 1H), 5.64 (s, 1H), 4.83 (d,  $J$  = 15.9 Hz, 1H), 4.20 (d,  $J$  = 15.9 Hz, 1H), 3.76 (s, 3H); <sup>13</sup>C NMR (101 MHz, (CD<sub>3</sub>)<sub>2</sub>CO)  $\delta$  160.9, 158.5, 150.1, 143.9, 137.9, 137.4, 133.7, 130.3, 129.5, 129.2, 129.2, 128.5, 128.3, 128.0, 127.8, 119.1, 117.6, 112.5, 112.3, 110.0, 60.9, 55.5, 54.8; IR (neat): 3064, 2935, 2229, 1586, 1547, 1489, 1446, 1264, 1126, 1025 cm<sup>-1</sup>; HRMS (ESI):  $m/z$  calcd for C<sub>29</sub>H<sub>24</sub>N<sub>3</sub>O [M+H], 430.1919; found, 430.1920.

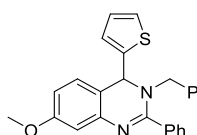

**3-Benzyl-7-methoxy-2-phenyl-4-(2-thienyl)-3,4-dihydroquinazoline (5n).**

Prepared according to the general 3,4-dihydroquinazoline synthesis protocol with **1** (0.227 g, 1.00 mmol), benzylamine (0.12 mL, 1.1 mmol), 2-thiophenecarboxaldehyde (0.10 mL, 1.1 mmol), CH<sub>2</sub>Cl<sub>2</sub> (10.0 mL), 2-

chloropyridine (0.11 mL, 1.2 mmol), and  $\text{TiF}_2\text{O}$  (0.18 mL, 1.1 mmol). The reaction proceeded for 24 h at rt after addition of  $\text{TiF}_2\text{O}$  and was worked up as described above. The residue was passed through a silica plug (90:10:0.5 EtOAc:hexanes:TEA as eluent) and the concentrated filtrate was further purified by flash chromatography (0% - 2% MeOH in 100:3  $\text{CH}_2\text{Cl}_2$ :ether mixture as eluent) to afford the desired product (0.281 g, 68% yield) as a solid (m.p. = 73 – 75 °C).  $^1\text{H}$  NMR (400 MHz,  $\text{CDCl}_3$ )  $\delta$  7.56 – 7.50 (m, 2H), 7.42 – 7.36 (m, 3H), 7.34 – 7.23 (m, 4H), 7.20 (d,  $J$  = 6.5 Hz, 2H), 6.98 – 6.87 (m, 3H), 6.74 (d,  $J$  = 8.4 Hz, 1H), 6.59 (dd,  $J$  = 8.4, 2.6 Hz, 1H), 5.66 (s, 1H), 4.75 (d,  $J$  = 15.6 Hz, 1H), 4.23 (d,  $J$  = 15.6 Hz, 1H), 3.79 (s, 3H);  $^{13}\text{C}$  NMR (101 MHz,  $\text{CDCl}_3$ )  $\delta$  159.9, 157.5, 147.3, 142.4, 136.6, 136.4, 129.4, 128.9, 128.6, 128.2, 127.9, 127.4, 126.9, 126.6, 125.7, 124.5, 116.9, 112.4, 108.7, 55.6, 55.3, 53.6; IR (neat): 3027, 2926, 1584, 1545, 1489, 1325, 1128, 1031  $\text{cm}^{-1}$ ; HRMS (ESI):  $m/z$  calcd for  $\text{C}_{26}\text{H}_{23}\text{N}_2\text{OS}$  [M+H], 411.1531; found, 411.1523.

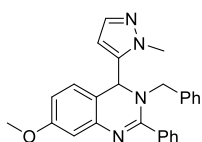

**5-(3-Benzyl-7-methoxy-2-phenyl-3,4-dihydroquinazolin-4-yl)-1-methyl-1H-pyrazole (5o).** Prepared according to the general 3,4-dihydroquinazoline synthesis protocol with **1** (0.227 g, 1.00 mmol), benzylamine (0.12 mL, 1.1 mmol), 1-methyl-1H-pyrazole-5-carboxaldehyde (0.11 mL, 1.1 mmol),  $\text{CH}_2\text{Cl}_2$  (10.0 mL), 2-chloropyridine (0.11 mL, 1.2 mmol), and  $\text{TiF}_2\text{O}$  (0.18 mL, 1.1 mmol). The reaction proceeded for 48 h at rt after addition of  $\text{TiF}_2\text{O}$  and was worked up as described above. The residue was passed through a silica plug (90:10:0.5 EtOAc:hexanes:TEA as eluent) and the concentrated filtrate was further purified by flash chromatography (80% EtOAc in hexanes as eluent) to afford the desired product (0.304 g, 75% yield) as a solid (m.p. = 133 - 134 °C).  $^1\text{H}$  NMR (400 MHz,  $\text{CDCl}_3$ )  $\delta$  7.57 – 7.52 (m, 2H), 7.47 – 7.38 (m, 4H), 7.35 – 7.24 (m, 3H), 7.18 (d,  $J$  = 6.8 Hz, 2H), 6.86 (d,  $J$  = 1.8 Hz, 1H), 6.58 – 6.55 (m, 2H), 6.23 (d,  $J$  = 1.8 Hz, 1H), 5.80 (s, 1H), 4.77 (d,  $J$  = 15.8 Hz, 1H), 3.93 (d,  $J$  = 15.7 Hz, 1H), 3.78 (s, 3H), 3.77 (s, 3H);  $^{13}\text{C}$  NMR (101 MHz,  $\text{CDCl}_3$ )  $\delta$  160.1, 158.0, 142.4, 142.3, 138.2, 136.2, 135.7, 129.6, 129.0, 128.8, 128.0, 127.9, 127.3, 127.0, 113.3, 112.6, 108.9, 107.0, 55.3, 53.2, 52.2, 37.1; IR (neat): 3029, 2943, 1586, 1547, 1491, 1420, 1258, 1129  $\text{cm}^{-1}$ ; HRMS (ESI):  $m/z$  calcd for  $\text{C}_{26}\text{H}_{25}\text{N}_4\text{O}$  [M+H], 409.2028; found, 409.2023.

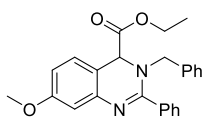

**Ethyl 3-benzyl-7-methoxy-2-phenyl-3,4-dihydroquinazoline-4-carboxylate (5p).** Prepared according to the general 3,4-dihydroquinazoline synthesis protocol with **1** (0.227 g, 1.00 mmol), benzylamine (0.12 mL, 1.1 mmol), 50% ethyl glyoxylate in toluene solution (0.225 g, 1.1 mmol),  $\text{CH}_2\text{Cl}_2$  (10.0 mL), 2-chloropyridine (0.11 mL, 1.2 mmol), and  $\text{TiF}_2\text{O}$  (0.18 mL, 1.1 mmol). The reaction proceeded for 24 h at rt after addition of  $\text{TiF}_2\text{O}$  and was worked up as described above. The residue was purified by flash chromatography (5% - 15% ether in  $\text{CH}_2\text{Cl}_2$  as eluent) to afford the desired product (0.282 g, 70% yield) as an oil.  $^1\text{H}$  NMR (400 MHz,  $(\text{CD}_3)_2\text{CO}$ )  $\delta$  7.79 – 7.72 (m, 2H), 7.52 – 7.43 (m, 3H), 7.30 – 7.21 (m, 3H), 7.20 – 7.13 (m, 2H), 7.03 (d,  $J$  = 8.4 Hz, 1H), 6.69 (d,  $J$  = 2.6 Hz, 1H), 6.64 (dd,  $J$  = 8.4, 2.6 Hz, 1H), 5.05 (s, 1H), 4.85 (d,  $J$  = 15.7 Hz, 1H), 4.31 (d,  $J$  = 15.7 Hz, 1H), 4.17 (qd,  $J$  = 7.1, 1.2 Hz, 2H), 3.78 (s, 3H), 1.23 (t,  $J$  = 7.1 Hz, 3H);  $^{13}\text{C}$  NMR (101 MHz,  $(\text{CD}_3)_2\text{CO}$ )  $\delta$  171.3, 161.4, 158.9, 144.8, 138.0, 137.7, 130.3, 129.6, 129.5, 129.1, 128.5, 128.3, 128.2, 113.8, 112.1, 109.6, 62.1, 60.0, 55.7, 55.5, 14.5; IR (neat): 3062, 2978, 1735, 1586, 1552, 1491, 1128, 1029  $\text{cm}^{-1}$ ; HRMS (ESI):  $m/z$  calcd for  $\text{C}_{25}\text{H}_{25}\text{N}_2\text{O}_3$  [M+H], 401.1865; found, 401.1868.

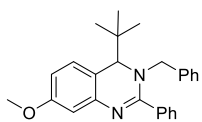

**3-Benzyl-4-(tert-butyl)-7-methoxy-2-phenyl-3,4-dihydroquinazoline (5q).** Prepared according to the general 3,4-dihydroquinazoline synthesis protocol with **1** (0.227 g, 1.00 mmol), benzylamine (0.12 mL, 1.1 mmol), trimethylacetaldehyde (0.12 mL, 1.1 mmol),  $\text{CH}_2\text{Cl}_2$  (10.0 mL), 2-chloropyridine (0.11 mL, 1.2 mmol), and  $\text{TiF}_2\text{O}$  (0.18 mL, 1.1 mmol). The reaction proceeded for 24 h at rt after addition of  $\text{TiF}_2\text{O}$  and was worked up as described above. The residue was passed through a silica plug (90:10:0.5 EtOAc:hexanes:TEA as eluent) and the concentrated filtrate was further purified by flash chromatography (3% ether in  $\text{CH}_2\text{Cl}_2$  as eluent) to afford the desired product (0.234 g, 61% yield) as a solid (m.p. = 45 - 47 °C).  $^1\text{H}$  NMR (400 MHz,  $\text{CDCl}_3$ )  $\delta$  7.80 – 7.71 (m, 2H), 7.45 – 7.37 (m, 3H), 7.13 – 7.04 (m, 3H), 6.93 – 6.81 (m, 3H), 6.65 – 6.59 (m, 2H), 4.97 (d,  $J$  = 15.8 Hz, 1H), 4.28 (d,  $J$  = 15.9 Hz, 1H), 3.96 (s, 1H), 3.81 (s, 3H), 0.99 (s, 9H);  $^{13}\text{C}$  NMR (101 MHz,  $\text{CDCl}_3$ )  $\delta$  160.0, 159.4, 145.1, 138.3, 136.6, 130.0, 129.1, 128.5, 128.4, 127.9, 127.3, 126.7, 115.3, 111.3, 107.9, 66.6, 58.9, 55.2, 40.9, 26.0; IR (neat): 3029, 2954, 1586,

1541, 1487, 1465, 1333, 1124, 1036  $\text{cm}^{-1}$ ; HRMS (ESI):  $m/z$  calcd for  $\text{C}_{26}\text{H}_{29}\text{N}_2\text{O}$  [M+H], 385.2280; found, 385.2277.

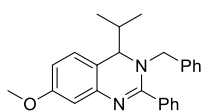

**3-Benzyl-4-isopropyl-7-methoxy-2-phenyl-3,4-dihydroquinazoline (5r).**

Prepared according to the general 3,4-dihydroquinazoline synthesis protocol with **1** (0.227 g, 1.00 mmol), benzylamine (0.12 mL, 1.1 mmol), isobutyraldehyde (0.10 mL, 1.1 mmol),  $\text{CH}_2\text{Cl}_2$  (10.0 mL), 2-chloropyridine (0.11 mL, 1.2 mmol), and  $\text{Tf}_2\text{O}$  (0.18 mL, 1.1 mmol). The reaction proceeded for 48 h at rt after addition of  $\text{Tf}_2\text{O}$  and was worked up as described above. The residue was purified by flash chromatography (45% EtOAc in cyclohexane as eluent) to afford the desired product (0.014 g, 4% yield) as an oil.  $^1\text{H}$  NMR (400 MHz,  $\text{CDCl}_3$ )  $\delta$  7.68 – 7.62 (m, 2H), 7.41 (ddd,  $J$  = 4.5, 2.6, 1.4 Hz, 3H), 7.22 – 7.15 (m, 3H), 7.03 – 6.98 (m, 2H), 6.88 (d,  $J$  = 2.4 Hz, 1H), 6.67 – 6.59 (m, 2H), 4.89 (d,  $J$  = 15.8 Hz, 1H), 4.31 (d,  $J$  = 15.8 Hz, 1H), 4.12 (d,  $J$  = 5.0 Hz, 1H), 3.81 (s, 3H), 2.12 – 2.02 (m, 1H), 1.01 (d,  $J$  = 6.9 Hz, 3H), 0.96 (d,  $J$  = 6.8 Hz, 3H);  $^{13}\text{C}$  NMR (101 MHz,  $\text{CDCl}_3$ )  $\delta$  159.5, 159.4, 144.4, 137.8, 136.4, 129.8, 128.8, 128.60, 128.56, 127.4, 126.80, 126.77, 115.7, 111.4, 107.9, 62.7, 56.4, 55.3, 35.7, 18.5, 18.0; IR (neat): 2957, 1584, 1541, 1489, 1271, 1128, 1034  $\text{cm}^{-1}$ ; HRMS (ESI):  $m/z$  calcd for  $\text{C}_{26}\text{H}_{25}\text{N}_4\text{O}$  [M+H], 371.2123; found, 371.2122.

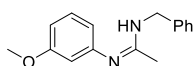

**1-Benzylamino-1-(m-methoxyphenylimino)ethane (6).**

A mixture of **3j** (0.168 g, 1.02 mmol) and 2,6-lutidine (0.26 mL, 2.2 mmol) in  $\text{CH}_2\text{Cl}_2$  (3.5 mL), cooled to 0 °C in an ice bath, was treated with  $\text{Tf}_2\text{O}$  (0.18 mL, 1.1 mmol). The ice bath was removed and the reaction stirred at rt under  $\text{N}_2$  atmosphere for one hour. The reaction was again cooled to 0 °C and benzylamine was added (0.16 mL, 1.5 mmol). The ice bath was removed and the reaction stirred at rt overnight under  $\text{N}_2$  atmosphere. The reaction was then diluted with saturated aqueous  $\text{NaHCO}_3$  solution and the mixture was extracted with  $\text{CH}_2\text{Cl}_2$  (x3). The pooled organic extracts were dried ( $\text{Na}_2\text{SO}_4$ ) and concentrated. The residue was purified by flash chromatography (10% - 30% EtOAc in hexanes as eluent) to afford the desired product (0.217 g, 84% yield) as an oil.  $^1\text{H}$  NMR (400 MHz,  $\text{DMSO-d}_6$ )  $\delta$  7.39 – 7.31 (m, 4H), 7.25 (ddt,  $J$  = 8.6, 6.0, 2.1 Hz, 1H), 7.14 – 7.04 (m, 2H), 6.46 (ddd,  $J$  = 8.2, 2.5, 1.0 Hz, 1H), 6.27 – 6.19 (m, 2H), 4.42 (d,  $J$  = 5.1 Hz, 2H), 3.70 (s, 3H), 1.78 (s, 3H);  $^{13}\text{C}$  NMR (101 MHz,  $\text{DMSO-d}_6$ )  $\delta$  159.7, 155.0, 153.5, 140.0, 129.1, 128.1, 127.5, 126.5, 114.6, 107.5, 106.6, 54.8, 43.9, 16.7; IR (neat): 3420, 3029, 2937, 1634, 1592, 1482, 1258, 1150  $\text{cm}^{-1}$ ; HRMS (ESI):  $m/z$  calcd for  $\text{C}_{16}\text{H}_{18}\text{N}_2\text{O}$  [M+H], 225.1497; found, 225.1487.

# X-Ray Crystal Data for Compound **2** (RAM717A)

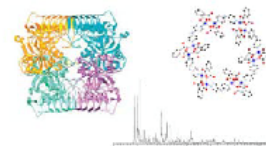

Submitted by: **R. Adam Mosey**  
Lake Superior State University  
Solved by: **Richard J Staples**  
Sample ID: **RAM717A**

Center Crystallographic for Research  
Michigan State University  
Department of Chemistry  
East Lansing, MI 48824  
**Dr. Richard J. Staples**  
staples@chemistry.msu.edu

Crystal structure from block-shaped crystals grown by slow evaporation from benzene and pentane (1:1).

## Crystal Data and Experimental

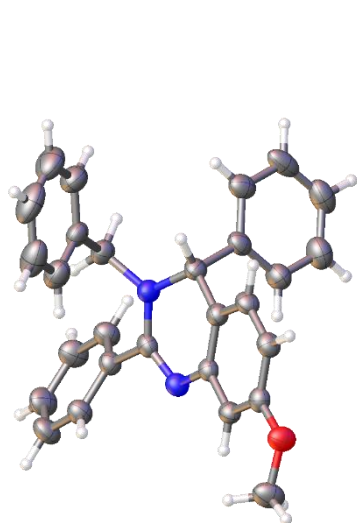

**Experimental.** Single colourless block-shaped crystals of **RAM717A** were used as received. A suitable crystal  $0.34 \times 0.32 \times 0.22 \text{ mm}^3$  was selected and mounted on a nylon loop with paratone oil on an Bruker APEX-II CCD diffractometer. The crystal was kept at a steady  $T = 173(2) \text{ K}$  during data collection. The structure was solved with the ShelXT<sup>17</sup> structure solution program using the Intrinsic Phasing solution method and by using Olex2<sup>18</sup> as the graphical interface. The model was refined with version 2018/3 of ShelXL<sup>19</sup> using Least Squares minimisation.

**Crystal Data.**  $\text{C}_{28}\text{H}_{24}\text{N}_2\text{O}$ ,  $M_r = 404.49$ , orthorhombic,  $Pna2_1$  (No. 33),  $a = 13.3870(8) \text{ \AA}$ ,  $b = 12.8591(8) \text{ \AA}$ ,  $c = 12.5553(8) \text{ \AA}$ ,  $\alpha = \beta = \gamma = 90^\circ$ ,  $V = 2161.3(2) \text{ \AA}^3$ ,  $T = 173(2) \text{ K}$ ,  $Z = 4$ ,  $Z' = 1$ ,  $\mu(\text{MoK}\alpha) = 0.076$ , 16762 reflections measured, 3954 unique ( $R_{\text{int}} = 0.0381$ ) which were used in all calculations. The final  $wR_2$  was 0.1035 (all data) and  $R_1$  was 0.0400 ( $I > 2(I)$ ).

| Compound                              | RAM717A                                        |
|---------------------------------------|------------------------------------------------|
| Formula                               | $\text{C}_{28}\text{H}_{24}\text{N}_2\text{O}$ |
| $D_{\text{calc.}} / \text{g cm}^{-3}$ | 1.243                                          |
| $\mu / \text{mm}^{-1}$                | 0.076                                          |
| Formula Weight                        | 404.49                                         |
| Colour                                | colourless                                     |
| Shape                                 | block                                          |
| Size/ $\text{mm}^3$                   | $0.34 \times 0.32 \times 0.22$                 |
| $T / \text{K}$                        | 173(2)                                         |
| Crystal System                        | orthorhombic                                   |
| Flack Parameter                       | 0.3(9)                                         |
| Hooft Parameter                       | 0.2(8)                                         |
| Space Group                           | $Pna2_1$                                       |
| $a / \text{\AA}$                      | 13.3870(8)                                     |
| $b / \text{\AA}$                      | 12.8591(8)                                     |
| $c / \text{\AA}$                      | 12.5553(8)                                     |
| $\alpha^\circ$                        | 90                                             |
| $\beta^\circ$                         | 90                                             |
| $\gamma^\circ$                        | 90                                             |
| $V / \text{\AA}^3$                    | 2161.3(2)                                      |
| $Z$                                   | 4                                              |
| $Z'$                                  | 1                                              |
| Wavelength/ $\text{\AA}$              | 0.710730                                       |
| Radiation type                        | $\text{MoK}\alpha$                             |
| $\theta_{\text{min}}^\circ$           | 2.196                                          |
| $\theta_{\text{max}}^\circ$           | 25.371                                         |
| Measured Refl.                        | 16762                                          |
| Independent Refl.                     | 3954                                           |
| Reflections with $I > 2(I)$           | 3442                                           |
| $R_{\text{int}}$                      | 0.0381                                         |
| Parameters                            | 281                                            |
| Restraints                            | 1                                              |
| Largest Peak                          | 0.119                                          |
| Deepest Hole                          | -0.166                                         |
| GooF                                  | 1.055                                          |
| $wR_2$ (all data)                     | 0.1035                                         |
| $wR_2$                                | 0.0967                                         |
| $R_1$ (all data)                      | 0.0478                                         |
| $R_1$                                 | 0.0400                                         |

## Structure Quality Indicators

|              |                 |  |              |  |               |  |               |  |             |  |
|--------------|-----------------|--|--------------|--|---------------|--|---------------|--|-------------|--|
| Reflections: | d min (Mo) 0.83 |  | I/σ 30.8     |  | Rint 3.81%    |  | complete 100% |  |             |  |
|              |                 |  |              |  |               |  |               |  |             |  |
| Refinement:  | Shift 0.000     |  | Max Peak 0.1 |  | Min Peak -0.2 |  | GooF 1.055    |  | Flack .3(9) |  |
|              |                 |  |              |  |               |  |               |  |             |  |

A colourless block-shaped crystal with dimensions 0.34×0.32×0.22 mm<sup>3</sup> was mounted on a nylon loop with paratone oil. Data were collected using a Bruker APEX-II CCD diffractometer equipped with an Oxford Cryosystems low-temperature device, operating at  $T = 173(2)$  K.

Data were measured using  $\omega$  of  $-0.50^\circ$  per frame for 100.84 s using MoK $\alpha$  radiation (sealed tube, 50 kV, 40 mA). The total number of runs and images was based on the strategy calculation from the program COSMO.<sup>20</sup> The actually achieved resolution was  $\Theta = 25.371$ .

Cell parameters were retrieved using the SAINT<sup>21</sup> software and refined using SAINT on 7459 reflections, 44% of the observed reflections. Data reduction was performed using the SAINT software which corrects for Lorentz polarisation. The final completeness is 100.00 out to 25.371 in  $\Theta$ . A multi-scan absorption correction was performed using SADABS-2014/5 was used for absorption correction.  $wR_2(\text{int})$  was 0.0583 before and 0.0549 after correction. The Ratio of minimum to maximum transmission is 0.9049. The  $\lambda/2$  correction factor is 0.00150. The absorption coefficient  $\mu$  of this material is 0.076 mm<sup>-1</sup> at this wavelength ( $\lambda = 0.711\text{\AA}$ ) and the minimum and maximum transmissions are 0.674 and 0.745. SADABS-2014/5 was used for absorption correction.  $wR_2(\text{int})$  was 0.0583 before and 0.0549 after correction. The Ratio of minimum to maximum transmission is 0.9049. The  $\lambda/2$  correction factor is 0.00150.

The structure was solved in the space group *Pna*2<sub>1</sub> (# 33) by Intrinsic Phasing using the ShelXT<sup>17</sup> structure solution program. The structure was refined by Least Squares using version 2014/6 of XL<sup>3</sup> incorporated in Olex2.<sup>18</sup> All non-hydrogen atoms were refined anisotropically. Hydrogen atom positions were calculated geometrically and refined using the riding model.

There is a single molecule in the asymmetric unit, which is represented by the reported sum formula. In other words: Z is 4 and Z' is 1.

The Flack parameter was refined to 0.3(9). Determination of absolute structure using Bayesian statistics on Bijvoet differences using the Olex2 results in 0.2(8). Note: The Flack parameter is used to determine chirality of the crystal studied, the value should be near 0, a value of 1 means that the stereochemistry is wrong and the model should be inverted. A value of 0.5 means that the crystal consists of a racemic mixture of the two enantiomers.

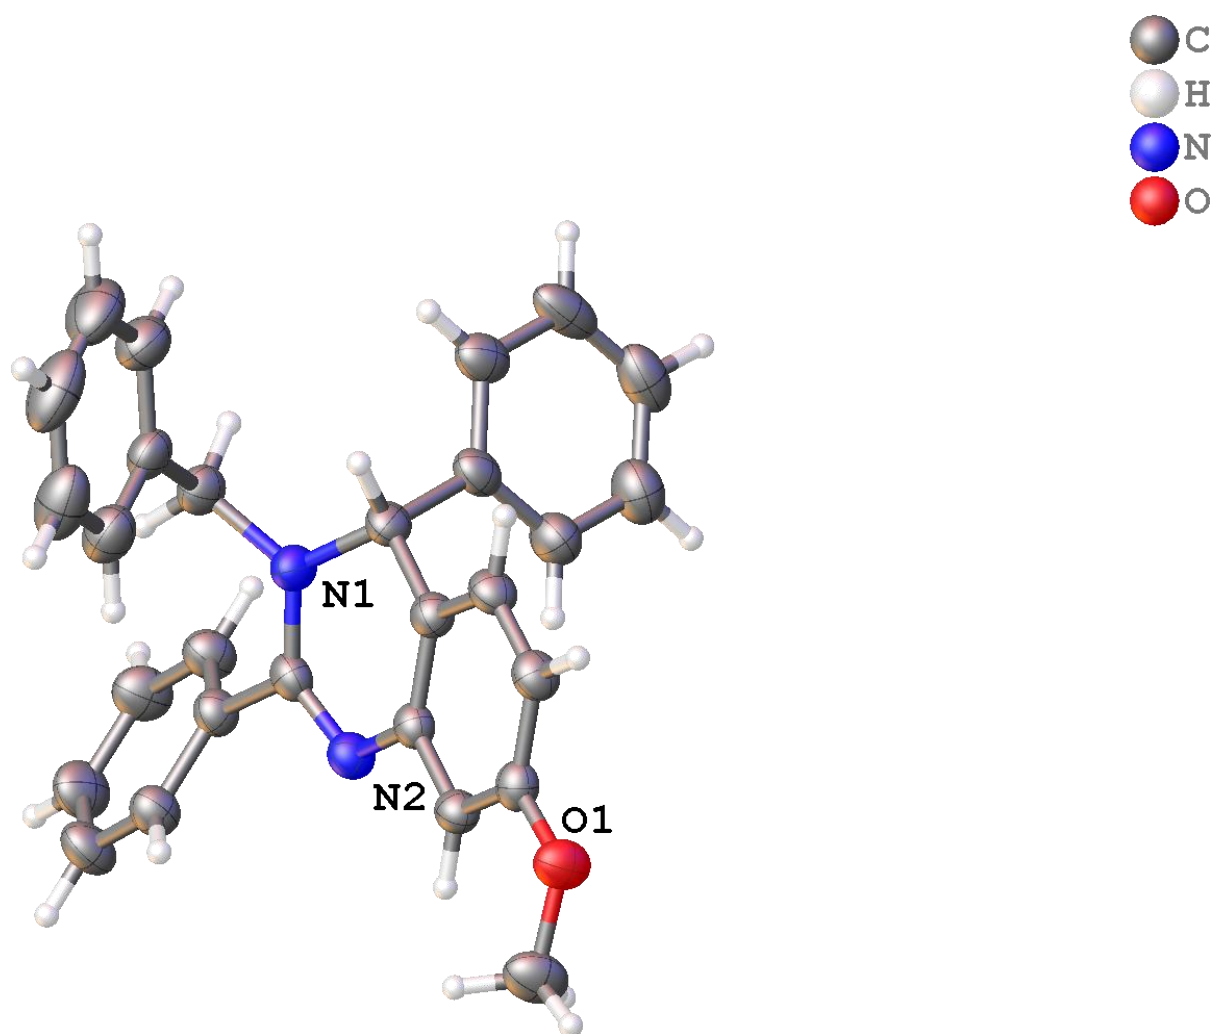

**Figure S1.** ORTEP representation of compound **2**. Thermal ellipsoids are drawn with 50% probability.

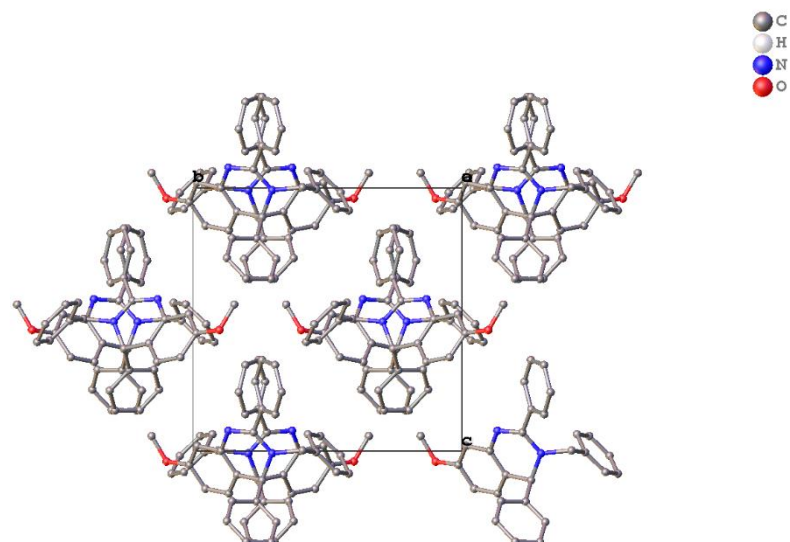

**Figure S2:** Packing diagram of RAM717A.

## Data Plots: Diffraction Data

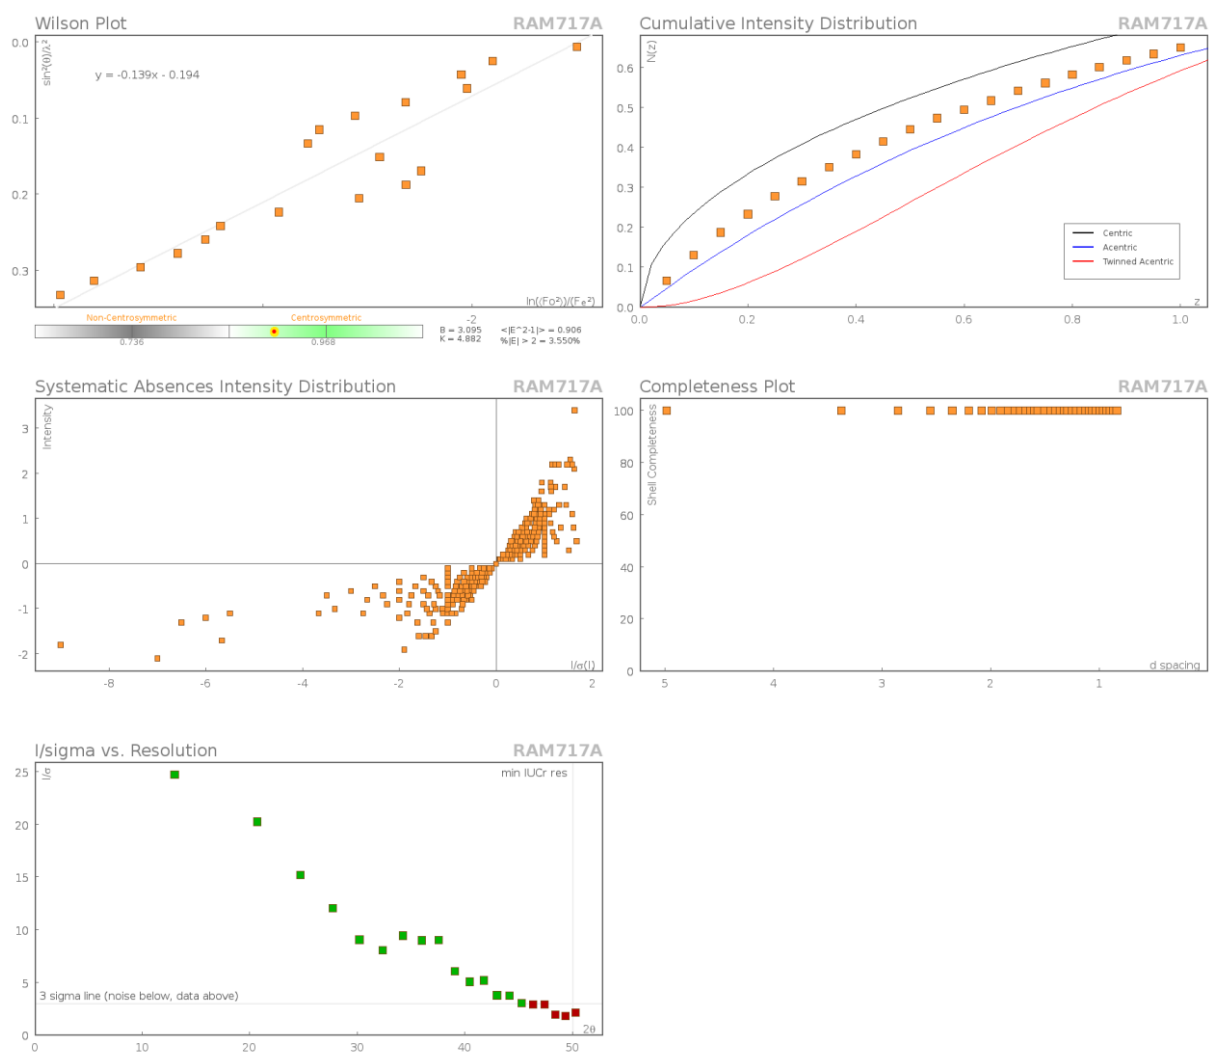

## Data Plots: Refinement and Data

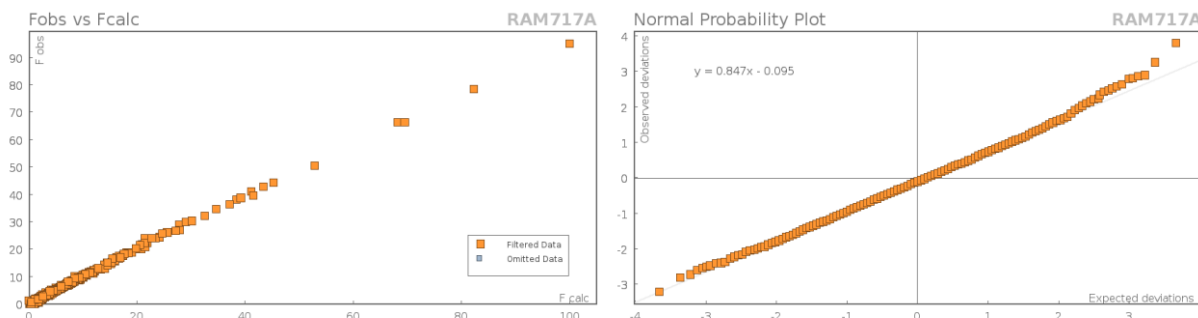

## Reflection Statistics

|                                     |                   |                               |                 |
|-------------------------------------|-------------------|-------------------------------|-----------------|
| Total reflections (after filtering) | 17607             | Unique reflections            | 3954            |
| Completeness                        | 0.999             | Mean $I/\sigma$               | 17.24           |
| $hkl_{\max}$ collected              | (16, 15, 15)      | $hkl_{\min}$ collected        | (-16, -15, -15) |
| $hkl_{\max}$ used                   | (16, 15, 15)      | $hkl_{\min}$ used             | (0, 0, -15)     |
| Lim $d_{\max}$ collected            | 100.0             | Lim $d_{\min}$ collected      | 0.36            |
| $d_{\max}$ used                     | 13.39             | $d_{\min}$ used               | 0.83            |
| Friedel pairs                       | 7030              | Friedel pairs merged          | 0               |
| Inconsistent equivalents            | 0                 | $R_{\text{int}}$              | 0.0381          |
| $R_{\text{sigma}}$                  | 0.0325            | Intensity transformed         | 0               |
| Omitted reflections                 | 0                 | Omitted by user (OMIT $hkl$ ) | 0               |
| Multiplicity                        | (12302, 2540, 75) | Maximum multiplicity          | 9               |
| Removed systematic absences         | 845               | Filtered off (Shel/OMIT)      | 0               |

## Images of the Crystal on the Diffractometer

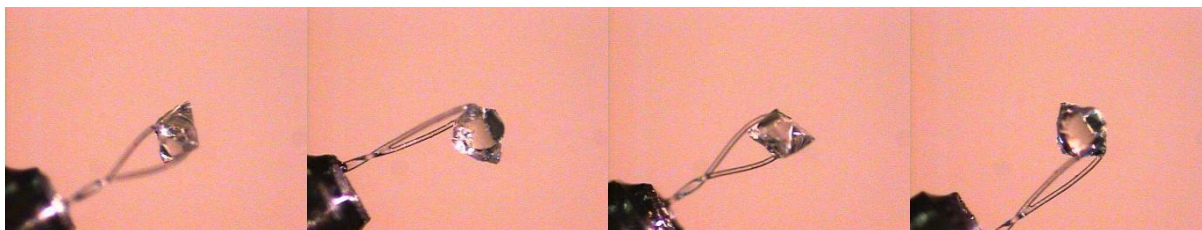

**Table S1:** Fractional Atomic Coordinates ( $\times 10^4$ ) and Equivalent Isotropic Displacement Parameters ( $\text{\AA}^2 \times 10^3$ ) for **RAM717A**.  $U_{eq}$  is defined as 1/3 of the trace of the orthogonalised  $U_{ij}$ .

| Atom | x          | y          | z          | $U_{eq}$ |
|------|------------|------------|------------|----------|
| O1   | 6094.5(14) | 5980.8(17) | 5398.8(17) | 43.2(5)  |
| N1   | 3288.5(17) | 2059.4(18) | 5086.6(19) | 35.9(5)  |
| N2   | 3465.8(17) | 3682.6(18) | 4228.4(18) | 34.5(5)  |
| C1   | 3098(2)    | 2747(2)    | 4290(2)    | 32.8(6)  |
| C2   | 3696(2)    | 2431(2)    | 6110(2)    | 35.0(6)  |
| C3   | 4344(2)    | 3366(2)    | 5905(2)    | 32.7(6)  |
| C4   | 5087(2)    | 3667(2)    | 6610(2)    | 36.4(7)  |
| C5   | 5656(2)    | 4541(2)    | 6434(2)    | 36.5(7)  |
| C6   | 5491(2)    | 5128(2)    | 5522(2)    | 34.0(6)  |
| C7   | 4757(2)    | 4844(2)    | 4804(2)    | 32.3(6)  |
| C8   | 4179.6(19) | 3958(2)    | 4992(2)    | 29.7(6)  |
| C9   | 3223(2)    | 929(2)     | 4977(3)    | 39.6(7)  |
| C10  | 4238(2)    | 421(2)     | 5049(2)    | 40.0(7)  |
| C11  | 5000(3)    | 724(2)     | 4363(3)    | 52.1(8)  |
| C12  | 5937(3)    | 269(3)     | 4428(4)    | 65.7(11) |
| C13  | 6113(3)    | -490(3)    | 5177(4)    | 73.4(13) |

| Atom | x       | y       | z       | $U_{eq}$ |
|------|---------|---------|---------|----------|
| C14  | 5372(3) | -793(3) | 5855(4) | 69.1(11) |
| C15  | 4438(3) | -334(3) | 5800(3) | 53.2(9)  |
| C16  | 2419(2) | 2427(2) | 3412(3) | 34.3(6)  |
| C17  | 2682(2) | 2680(2) | 2366(2) | 39.5(7)  |
| C18  | 2043(3) | 2435(3) | 1542(3) | 47.4(8)  |
| C19  | 1151(3) | 1947(3) | 1733(3) | 51.6(9)  |
| C20  | 878(2)  | 1705(2) | 2761(3) | 48.0(8)  |
| C21  | 1510(2) | 1942(2) | 3600(3) | 41.7(7)  |
| C22  | 2867(2) | 2631(2) | 6925(2) | 38.2(7)  |
| C23  | 2328(2) | 3552(3) | 6908(3) | 46.3(8)  |
| C24  | 1600(3) | 3742(3) | 7663(3) | 56.7(9)  |
| C25  | 1401(3) | 3026(3) | 8445(3) | 56.8(9)  |
| C26  | 1913(3) | 2098(3) | 8456(3) | 54.3(9)  |
| C27  | 2647(2) | 1902(2) | 7700(3) | 43.7(8)  |
| C28  | 6006(2) | 6537(3) | 4429(3) | 51.6(8)  |

**Table S2:** Anisotropic Displacement Parameters ( $\times 10^4$ ) **RAM717A**. The anisotropic displacement factor exponent takes the form:  $-2\pi^2[h^2a^{*2} \times U_{11} + \dots + 2hka^* \times b^* \times U_{12}]$

| Atom | $U_{11}$ | $U_{22}$ | $U_{33}$ | $U_{23}$  | $U_{13}$  | $U_{12}$  |
|------|----------|----------|----------|-----------|-----------|-----------|
| O1   | 42.5(11) | 45.4(13) | 41.7(12) | 3.1(9)    | -6.1(10)  | -12.6(9)  |
| N1   | 42.4(13) | 32.7(12) | 32.7(13) | -0.8(10)  | -4.9(11)  | -2.5(10)  |
| N2   | 34.7(12) | 38.0(13) | 30.7(13) | -0.4(10)  | -4.0(10)  | -2.8(10)  |
| C1   | 32.0(14) | 38.7(16) | 27.6(15) | -3.5(12)  | 1.8(11)   | 2.4(11)   |
| C2   | 41.2(16) | 35.1(15) | 28.6(14) | 0.3(12)   | -5.6(12)  | 0.9(12)   |
| C3   | 33.5(14) | 32.6(15) | 32.1(15) | -0.7(11)  | -1.0(12)  | 2.0(12)   |
| C4   | 39.2(16) | 41.4(16) | 28.7(15) | 1.7(12)   | -4.9(13)  | 2.0(13)   |
| C5   | 34.3(15) | 42.5(17) | 32.8(16) | -2.5(13)  | -5.4(12)  | -0.1(13)  |
| C6   | 31.0(14) | 35.3(15) | 35.8(15) | -4.9(12)  | 1.0(12)   | 0.4(12)   |
| C7   | 33.5(14) | 33.5(15) | 29.9(14) | 1.0(11)   | -1.1(12)  | 2.3(11)   |
| C8   | 28.3(12) | 32.4(15) | 28.3(14) | -2.8(12)  | -0.7(12)  | 2.5(11)   |
| C9   | 44.0(16) | 34.1(15) | 40.8(17) | -2.0(14)  | -3.1(14)  | -6.0(13)  |
| C10  | 48.7(17) | 27.6(15) | 43.8(17) | -4.6(13)  | -3.3(14)  | -2.3(13)  |
| C11  | 55.1(19) | 40.5(17) | 61(2)    | -4.1(17)  | 6.0(17)   | -2.0(15)  |
| C12  | 53(2)    | 52(2)    | 92(3)    | -20(2)    | 15(2)     | -4.5(17)  |
| C13  | 61(2)    | 51(2)    | 108(4)   | -24(2)    | -15(3)    | 15.0(18)  |
| C14  | 85(3)    | 48(2)    | 75(3)    | -5(2)     | -17(2)    | 19(2)     |
| C15  | 65(2)    | 40.7(18) | 54(2)    | 0.9(16)   | -4.9(17)  | 4.0(16)   |
| C16  | 35.3(15) | 36.6(15) | 30.8(14) | -2.5(13)  | -3.5(12)  | -1.8(12)  |
| C17  | 38.2(16) | 44.1(17) | 36.2(16) | -1.6(13)  | -0.9(13)  | -6.3(13)  |
| C18  | 52(2)    | 60(2)    | 29.5(15) | -0.8(15)  | -2.5(14)  | -10.1(16) |
| C19  | 58(2)    | 58(2)    | 39.5(19) | -4.8(16)  | -14.9(16) | -12.3(17) |
| C20  | 42.0(18) | 54.2(19) | 47.8(19) | 3.0(17)   | -5.2(15)  | -14.4(15) |
| C21  | 41.7(16) | 46.5(17) | 36.9(17) | 1.5(14)   | -1.1(14)  | -8.1(13)  |
| C22  | 43.5(17) | 44.4(17) | 26.7(14) | -2.0(13)  | -3.7(13)  | -8.0(14)  |
| C23  | 50.4(19) | 48.6(19) | 40.0(17) | -0.2(14)  | 4.6(15)   | 1.9(15)   |
| C24  | 56(2)    | 65(2)    | 49(2)    | -10.1(19) | 6.5(18)   | 0.2(17)   |
| C25  | 51(2)    | 77(3)    | 42(2)    | -16.3(19) | 8.2(17)   | -17.0(18) |
| C26  | 55(2)    | 78(3)    | 29.9(17) | 2.3(17)   | -1.7(16)  | -32.8(19) |
| C27  | 48.8(19) | 48.3(18) | 34.2(16) | 1.1(15)   | -8.6(14)  | -13.4(15) |
| C28  | 48.5(19) | 59(2)    | 47.2(19) | 9.1(17)   | -1.6(16)  | -19.6(16) |

**Table S3:** Bond Lengths in Å for **RAM717A**.

| Atom | Atom | Length/Å | Atom | Atom | Length/Å |
|------|------|----------|------|------|----------|
| O1   | C6   | 1.371(3) | N2   | C1   | 1.302(3) |
| O1   | C28  | 1.417(4) | N2   | C8   | 1.400(3) |
| N1   | C1   | 1.360(4) | C1   | C16  | 1.486(4) |
| N1   | C2   | 1.476(4) | C2   | C3   | 1.505(4) |
| N1   | C9   | 1.463(4) | C2   | C22  | 1.531(4) |

| Atom | Atom | Length/Å |
|------|------|----------|
| C3   | C4   | 1.386(4) |
| C3   | C8   | 1.393(4) |
| C4   | C5   | 1.375(4) |
| C5   | C6   | 1.390(4) |
| C6   | C7   | 1.383(4) |
| C7   | C8   | 1.396(4) |
| C9   | C10  | 1.509(4) |
| C10  | C11  | 1.391(5) |
| C10  | C15  | 1.380(5) |
| C11  | C12  | 1.387(5) |
| C12  | C13  | 1.376(7) |
| C13  | C14  | 1.365(6) |
| C14  | C15  | 1.385(6) |

| Atom | Atom | Length/Å |
|------|------|----------|
| C16  | C17  | 1.398(4) |
| C16  | C21  | 1.388(4) |
| C17  | C18  | 1.378(4) |
| C18  | C19  | 1.370(5) |
| C19  | C20  | 1.378(5) |
| C20  | C21  | 1.384(4) |
| C22  | C23  | 1.386(4) |
| C22  | C27  | 1.383(4) |
| C23  | C24  | 1.382(5) |
| C24  | C25  | 1.372(5) |
| C25  | C26  | 1.377(5) |
| C26  | C27  | 1.389(5) |

**Table S4:** Bond Angles in ° for **RAM717A**.

| Atom | Atom | Atom | Angle/°  |
|------|------|------|----------|
| C6   | O1   | C28  | 116.8(2) |
| C1   | N1   | C2   | 120.0(2) |
| C1   | N1   | C9   | 124.5(2) |
| C9   | N1   | C2   | 115.2(2) |
| C1   | N2   | C8   | 116.9(2) |
| N1   | C1   | C16  | 118.7(2) |
| N2   | C1   | N1   | 125.0(3) |
| N2   | C1   | C16  | 116.3(2) |
| N1   | C2   | C3   | 108.8(2) |
| N1   | C2   | C22  | 111.6(2) |
| C3   | C2   | C22  | 113.5(2) |
| C4   | C3   | C2   | 121.8(3) |
| C4   | C3   | C8   | 119.1(3) |
| C8   | C3   | C2   | 119.1(2) |
| C5   | C4   | C3   | 121.5(3) |
| C4   | C5   | C6   | 119.3(3) |
| O1   | C6   | C5   | 115.7(2) |
| O1   | C6   | C7   | 123.9(3) |
| C7   | C6   | C5   | 120.4(3) |
| C6   | C7   | C8   | 119.9(2) |
| C3   | C8   | N2   | 122.2(2) |
| C3   | C8   | C7   | 119.8(2) |
| C7   | C8   | N2   | 117.9(2) |
| N1   | C9   | C10  | 111.7(2) |
| C11  | C10  | C9   | 120.1(3) |
| C15  | C10  | C9   | 121.3(3) |
| C15  | C10  | C11  | 118.5(3) |
| C12  | C11  | C10  | 120.6(4) |
| C13  | C12  | C11  | 119.6(4) |
| C14  | C13  | C12  | 120.3(4) |
| C13  | C14  | C15  | 120.3(4) |
| C10  | C15  | C14  | 120.6(4) |
| C17  | C16  | C1   | 118.5(3) |
| C21  | C16  | C1   | 122.4(3) |
| C21  | C16  | C17  | 119.0(3) |
| C18  | C17  | C16  | 119.7(3) |
| C19  | C18  | C17  | 120.9(3) |
| C18  | C19  | C20  | 119.9(3) |
| C19  | C20  | C21  | 120.1(3) |
| C20  | C21  | C16  | 120.4(3) |
| C23  | C22  | C2   | 120.7(3) |
| C27  | C22  | C2   | 120.7(3) |
| C27  | C22  | C23  | 118.6(3) |

| Atom | Atom | Atom | Angle/°  |
|------|------|------|----------|
| C24  | C23  | C22  | 120.5(3) |
| C25  | C24  | C23  | 120.6(4) |
| C24  | C25  | C26  | 119.5(3) |
| C25  | C26  | C27  | 120.2(3) |
| C22  | C27  | C26  | 120.6(3) |

**Table S5:** Hydrogen Fractional Atomic Coordinates ( $\times 10^4$ ) and Equivalent Isotropic Displacement Parameters ( $\text{\AA}^2 \times 10^3$ ) for **RAM717A**.  $U_{eq}$  is defined as 1/3 of the trace of the orthogonalised  $U_{ij}$ .

| Atom | x       | y        | z       | $U_{eq}$ |
|------|---------|----------|---------|----------|
| H2   | 4134.41 | 1869.33  | 6402.06 | 42       |
| H4   | 5206.13 | 3259.77  | 7228.65 | 44       |
| H5   | 6155.54 | 4740.53  | 6930.37 | 44       |
| H7   | 4644.74 | 5250.54  | 4183.44 | 39       |
| H9A  | 2915.85 | 756.58   | 4282.13 | 48       |
| H9B  | 2786.93 | 648.16   | 5545.17 | 48       |
| H11  | 4877.38 | 1247.59  | 3845.58 | 63       |
| H12  | 6454.41 | 479.96   | 3957.24 | 79       |
| H13  | 6754.12 | -804.6   | 5222.45 | 88       |
| H14  | 5496.77 | -1321.53 | 6367.16 | 83       |
| H15  | 3929.58 | -540.88  | 6284.28 | 64       |
| H17  | 3297.62 | 3019.86  | 2224.1  | 47       |
| H18  | 2224.75 | 2607.15  | 832.21  | 57       |
| H19  | 721.77  | 1776.32  | 1156.49 | 62       |
| H20  | 255.76  | 1375.32  | 2894.79 | 58       |
| H21  | 1319.48 | 1771.04  | 4307.44 | 50       |
| H23  | 2460.63 | 4055.99  | 6373.06 | 56       |
| H24  | 1233.55 | 4374.37  | 7641.09 | 68       |
| H25  | 912.75  | 3169.41  | 8974.45 | 68       |
| H26  | 1764.47 | 1589.8   | 8981.72 | 65       |
| H27  | 3000.82 | 1262.28  | 7715.1  | 52       |
| H28A | 6151.87 | 6071.3   | 3831.07 | 77       |
| H28B | 6481.14 | 7117.05  | 4426.27 | 77       |
| H28C | 5325.01 | 6807.34  | 4359.39 | 77       |

## References and Notes

1. (a) S. Ueda and H. Nagasawa, *J. Org. Chem.*, 2009, **74**, 4272-4277; (b) K. Dooleweerd, B. P. Fors and S. L. Buchwald, *Org. Lett.*, 2010, **12**, 2350-2353.
2. J. Wang, X. Yin, J. Wu, D. Wu and Y. Pan, *Tetrahedron*, 2013, **69**, 10463-10469.
3. Z. Zhang, Y. Yu and L. S. Liebeskind, *Org. Lett.*, 2008, **10**, 3005-3008.
4. G. La Regina, R. Bai, A. Coluccia, V. Famiglini, S. Pelliccia, S. Passacantilli, C. Mazzocchi, V. Ruggieri, A. Verrico, A. Miele, L. Monti, M. Nalli, R. Alfonsi, L. Di Marcotullio, A. Gulino, B. Ricci, A. Soriani, A. Santoni, M. Caraglia, S. Porto, E. Da Pozzo, C. Martini, A. Brancale, L. Marinelli, E. Novellino, S. Vultaggio, M. Varasi, C. Mercurio, C. Bigogno, G. Dondio, E. Hamel, P. Lavia and R. Silvestri, *J. Med. Chem.*, 2015, **58**, 5789-5807.
5. J. A. Hartsel, D. T. Craft, Q.-H. Chen, M. Ma and P. R. Carlier, *J. Org. Chem.*, 2012, **77**, 3127-3133.
6. (a) J. Du, K. Luo and X. Zhang, *RSC Adv.*, 2014, **4**, 54539-54546; (b) S.-K. Xiang, J.-M. Li, H. Huang, C. Feng, H.-L. Ni, X.-Z. Chen, B.-Q. Wang, K.-Q. Zhao, P. Hu and C. Redshaw, *Adv. Synth. Catal.*, 2015, **357**, 3435-3440.
7. S. M. Johnson, S. Connelly, I. A. Wilson and J. W. Kelly, *J. Med. Chem.*, 2008, **51**, 6348-6358.
8. A. Klapars, J. C. Antilla, X. Huang and S. L. Buchwald, *J. Am. Chem. Soc.*, 2001, **123**, 7727-7729.
9. D. R. Stuart, M. Bertrand-Laperle, K. M. N. Burgess and K. Fagnou, *J. Am. Chem. Soc.*, 2008, **130**, 16474-16475.
10. F. Zhou, X. Han and X. Lu, *Tetrahedron Lett.*, 2011, **52**, 4681-4685.
11. T. Ikawa, T. E. Barder, M. R. Biscoe and S. L. Buchwald, *J. Am. Chem. Soc.*, 2007, **129**, 13001-13007.
12. S. Kim, H. Ko, S. Kim and T. Lee, *J. Comb. Chem.*, 2002, **4**, 549-551.
13. A. Verma, S. Patel, Meenakshi, A. Kumar, A. Yadav, S. Kumar, S. Jana, S. Sharma, C. D. Prasad and S. Kumar, *Chem. Commun.*, 2015, **51**, 1371-1374.
14. S. Hwang, S. Y. Choi, J. H. Lee, S. Kim, J. In, S. K. Ha, E. Lee, T.-Y. Kim, S. Y. Kim, S. Choi and S. Kim, *Bioorg. Med. Chem.*, 2010, **18**, 5602-5609.
15. K. Waissner, J. Kunes, L. Kubicova, M. Budesinsky and O. Exner, *Magn. Reson. Chem.*, **1997**, **35**, 543-548.
16. C. K. Lee, J. S. Yu and Y. R. Ji, *J. Heterocycl. Chem.*, 2002, **39**, 1219-1227.
17. G. M. Sheldrick, *Acta Cryst.*, 2015, **A71**, 3-8.
18. O. V. Dolomanov, L. J. Bourhis, R. J. Gildea, J. A. K. Howard and H. Puschmann, *J. Appl. Cryst.*, 2009, **42**, 339-341.
19. G. M. Sheldrick, *Acta Cryst.*, 2008, **A64**, 112-122.
20. COSMO-V1.61 - Software for the CCD Detector Systems for Determining Data Collection Parameters, Bruker axs, Madison, WI (2000).
21. Software for the Integration of CCD Detector System Bruker Analytical X-ray Systems, Bruker axs, Madison, WI (after 2013).

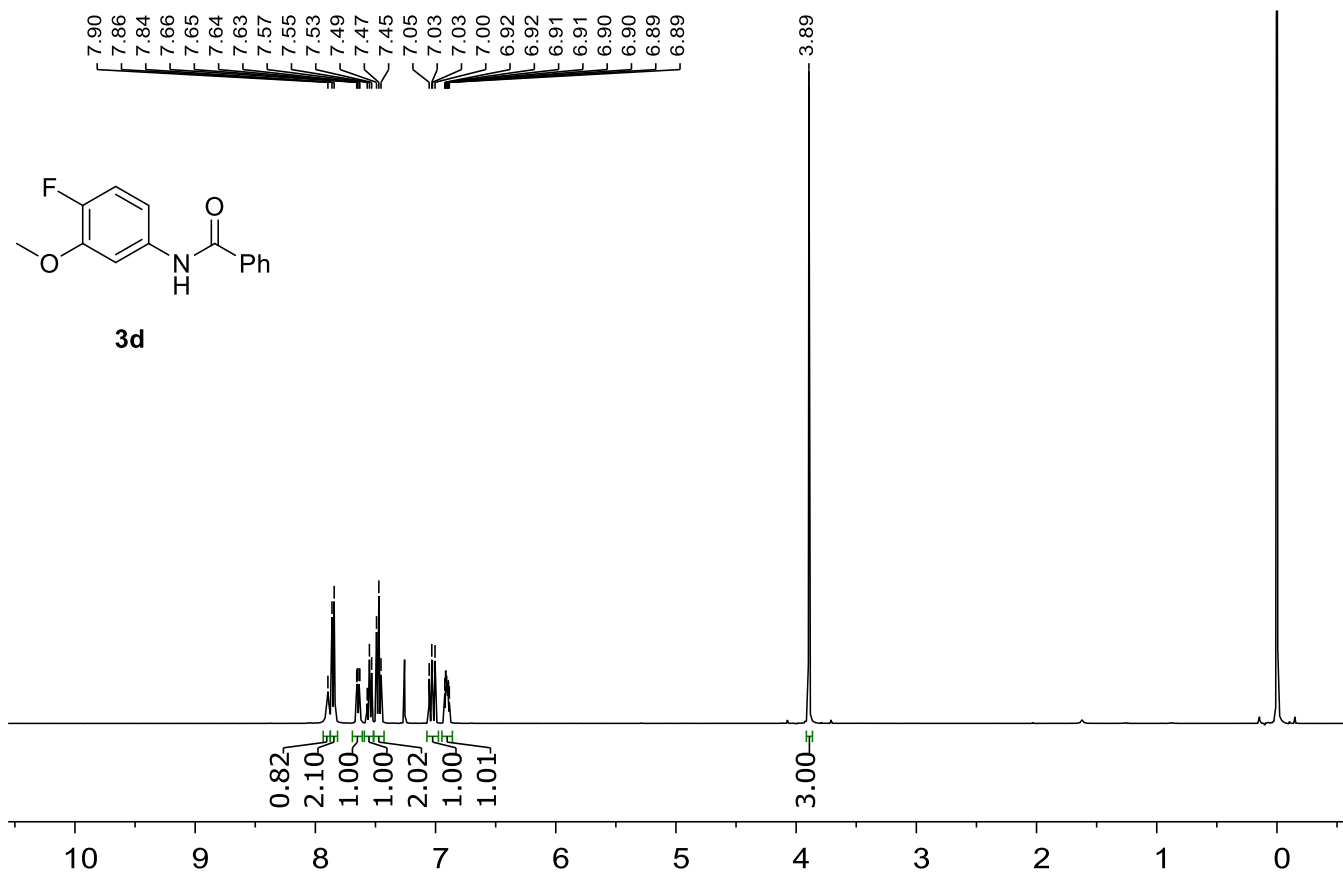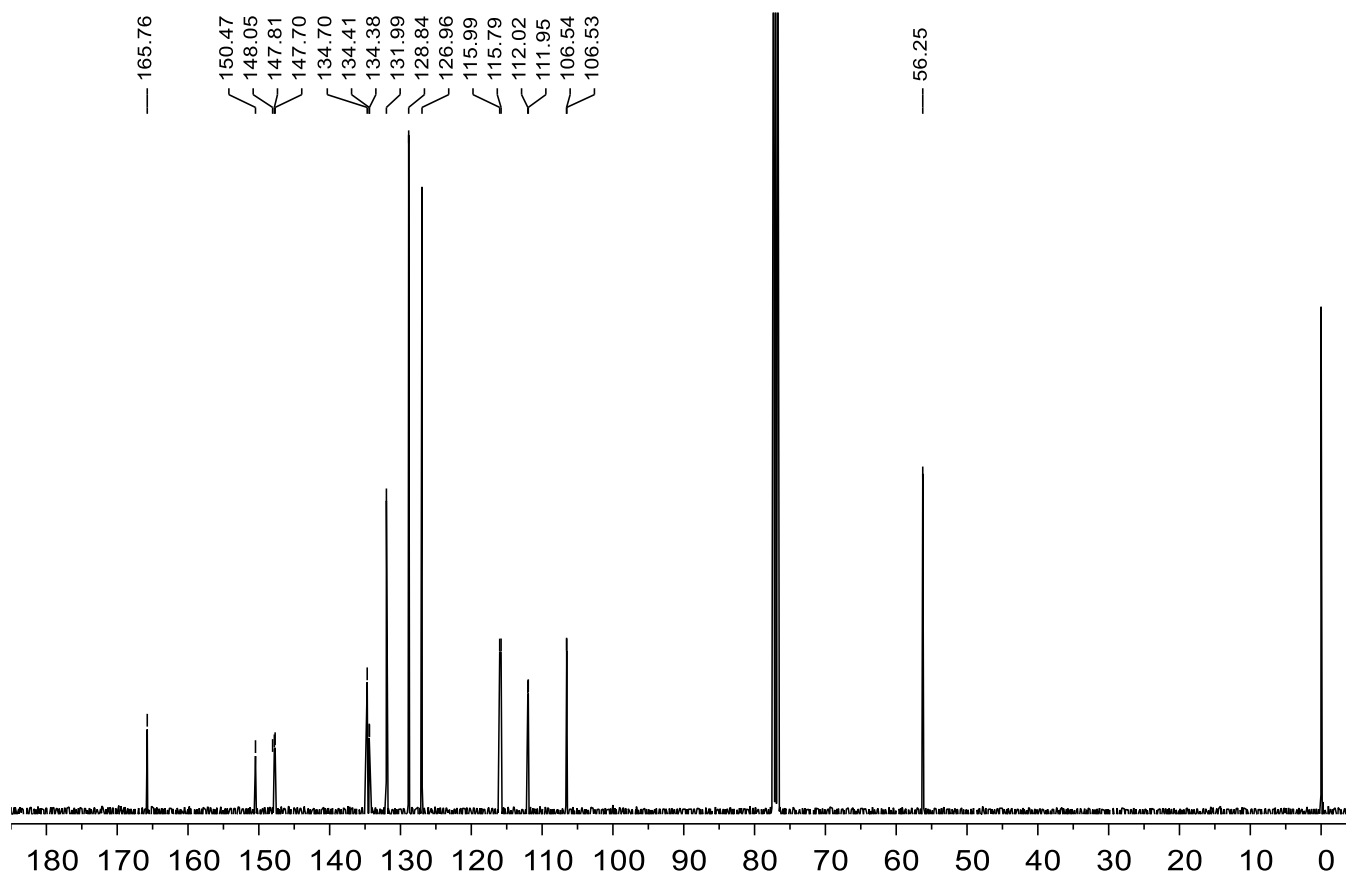

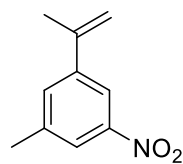

S1

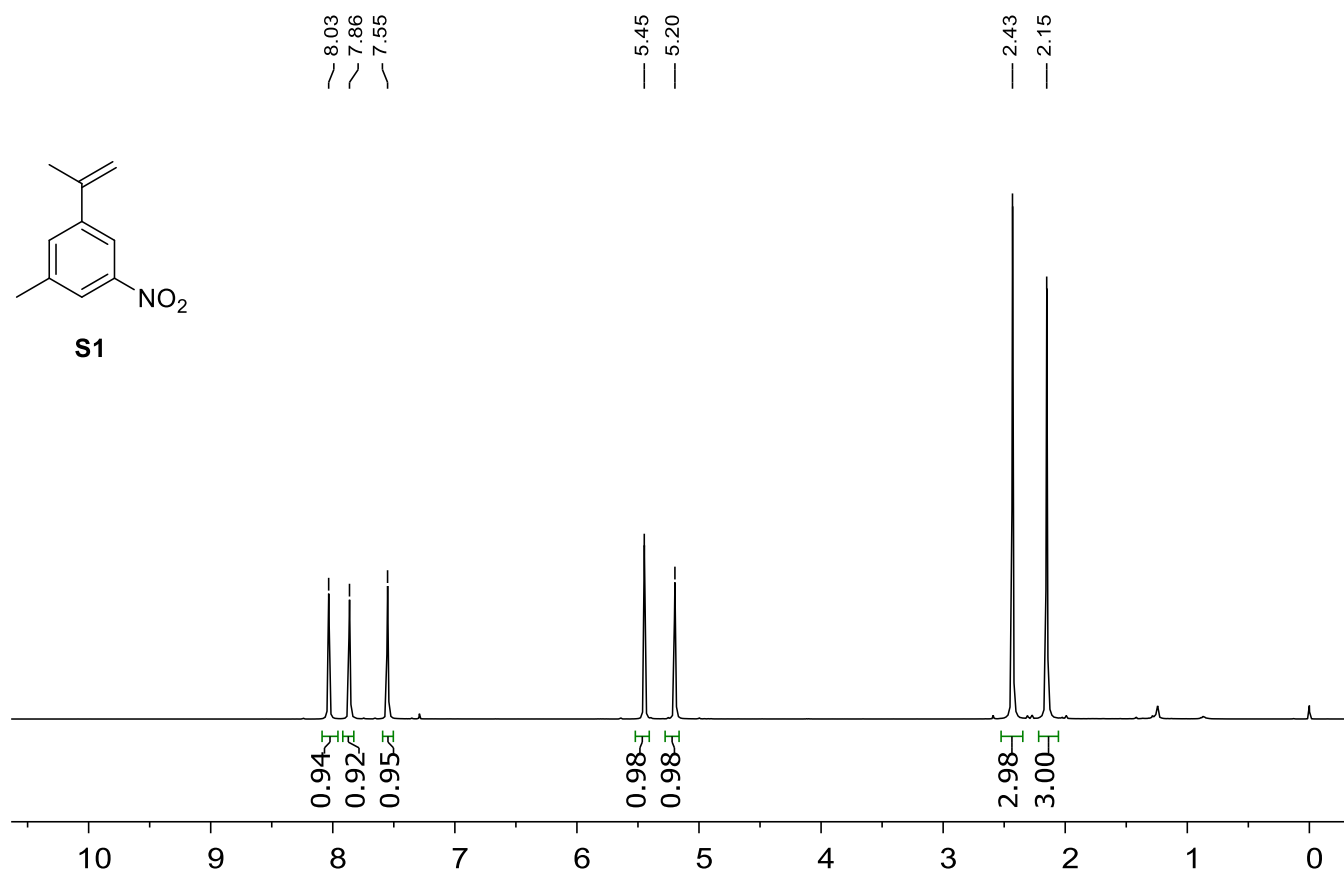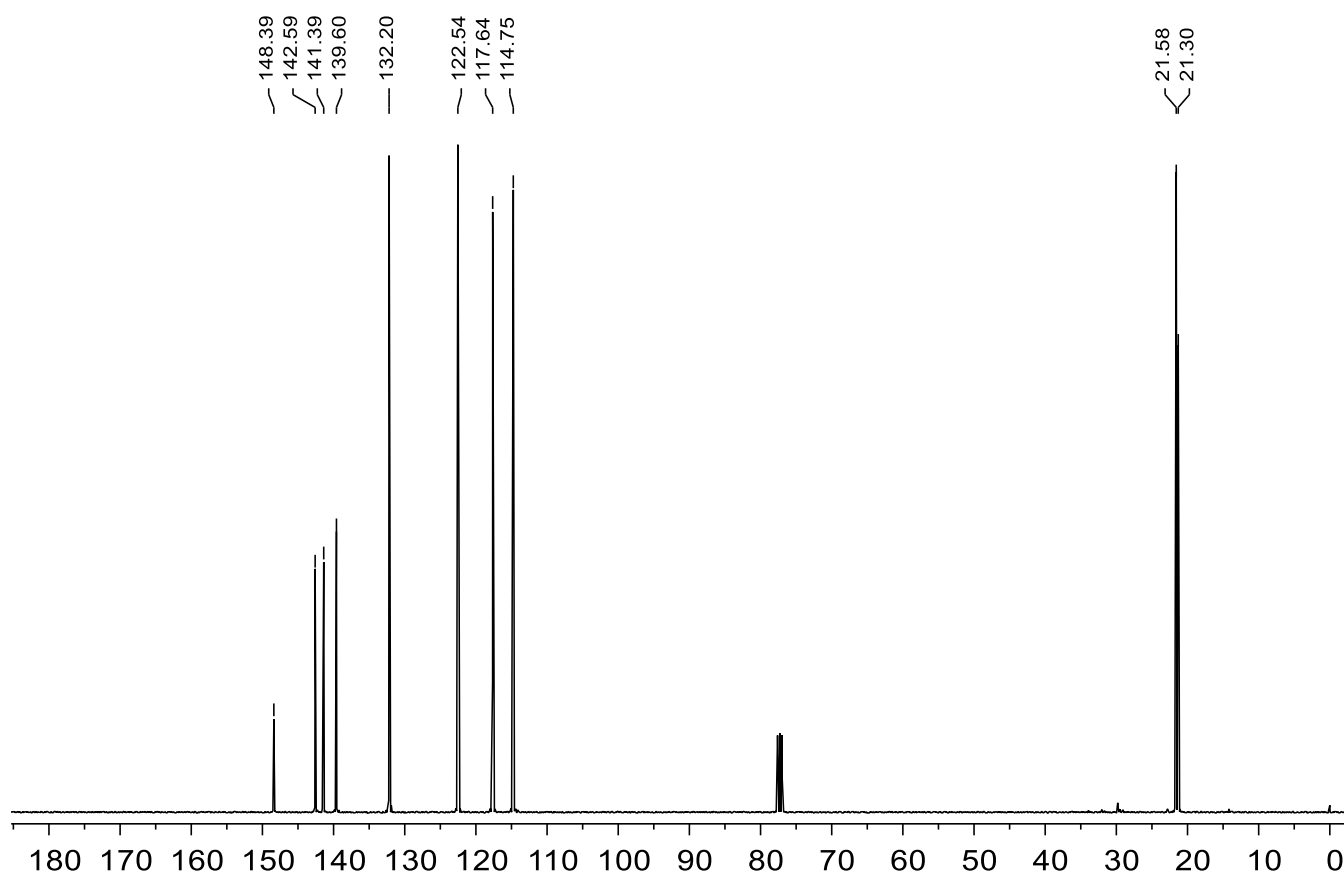

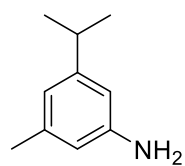

**S2**

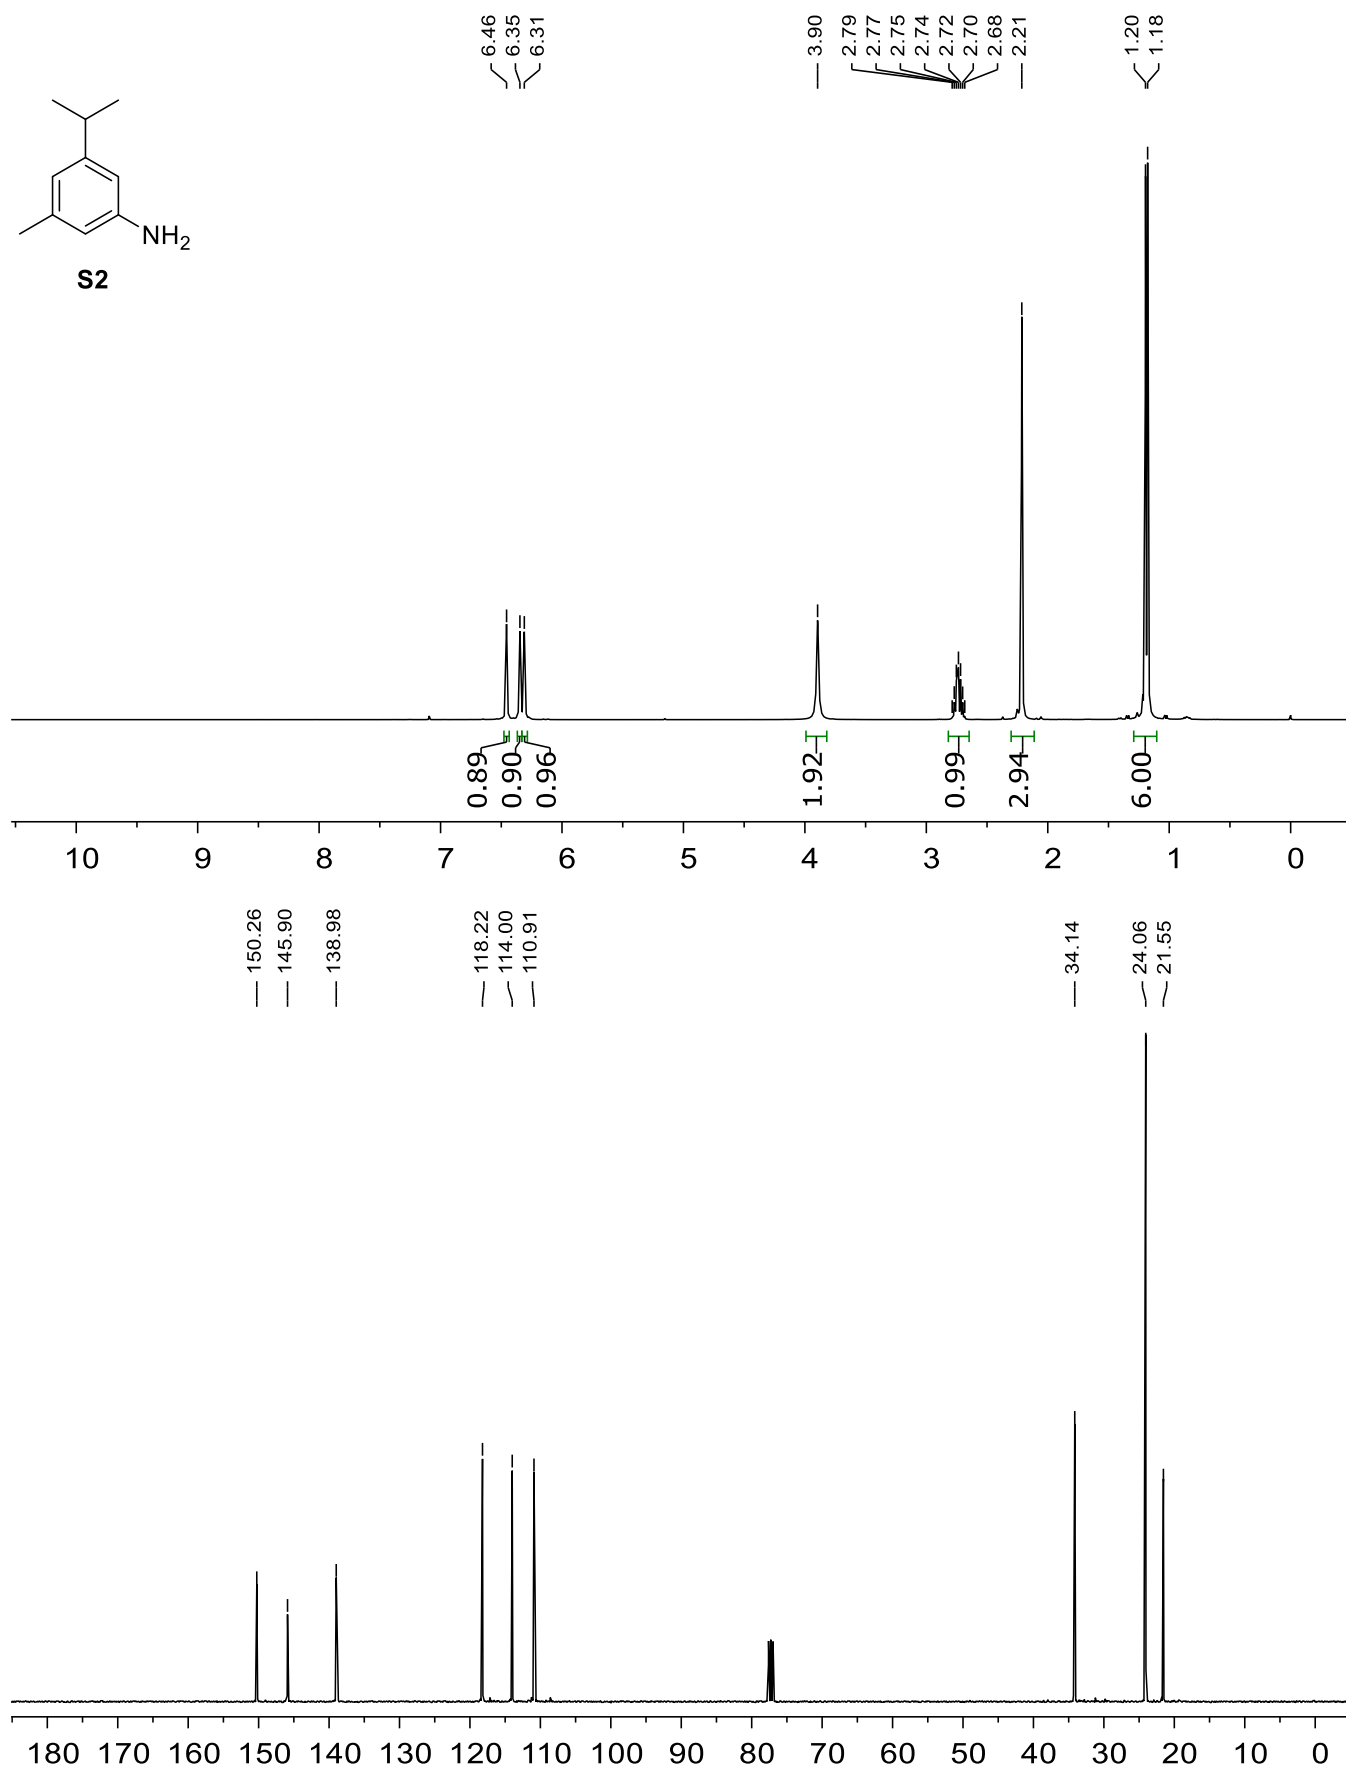

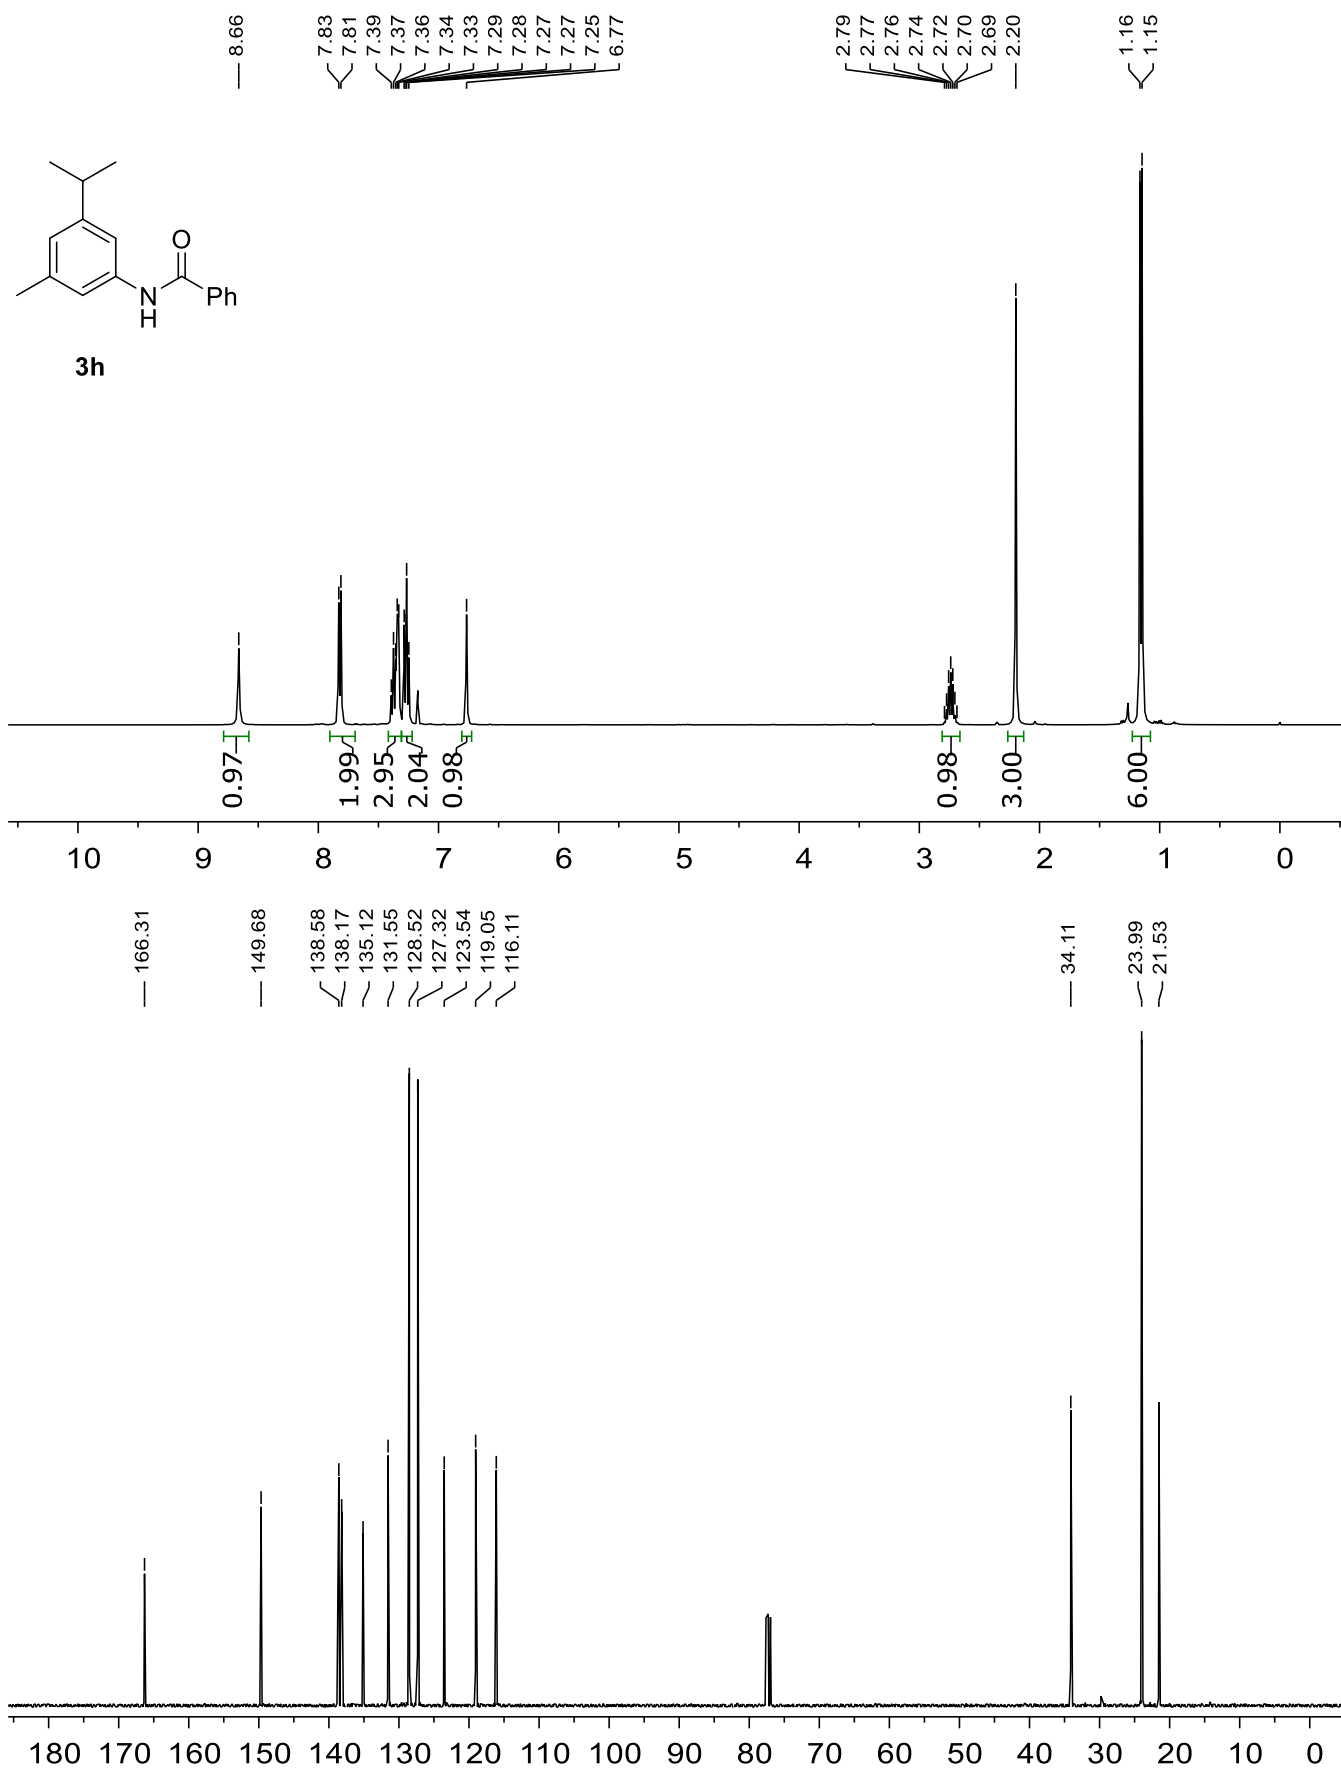

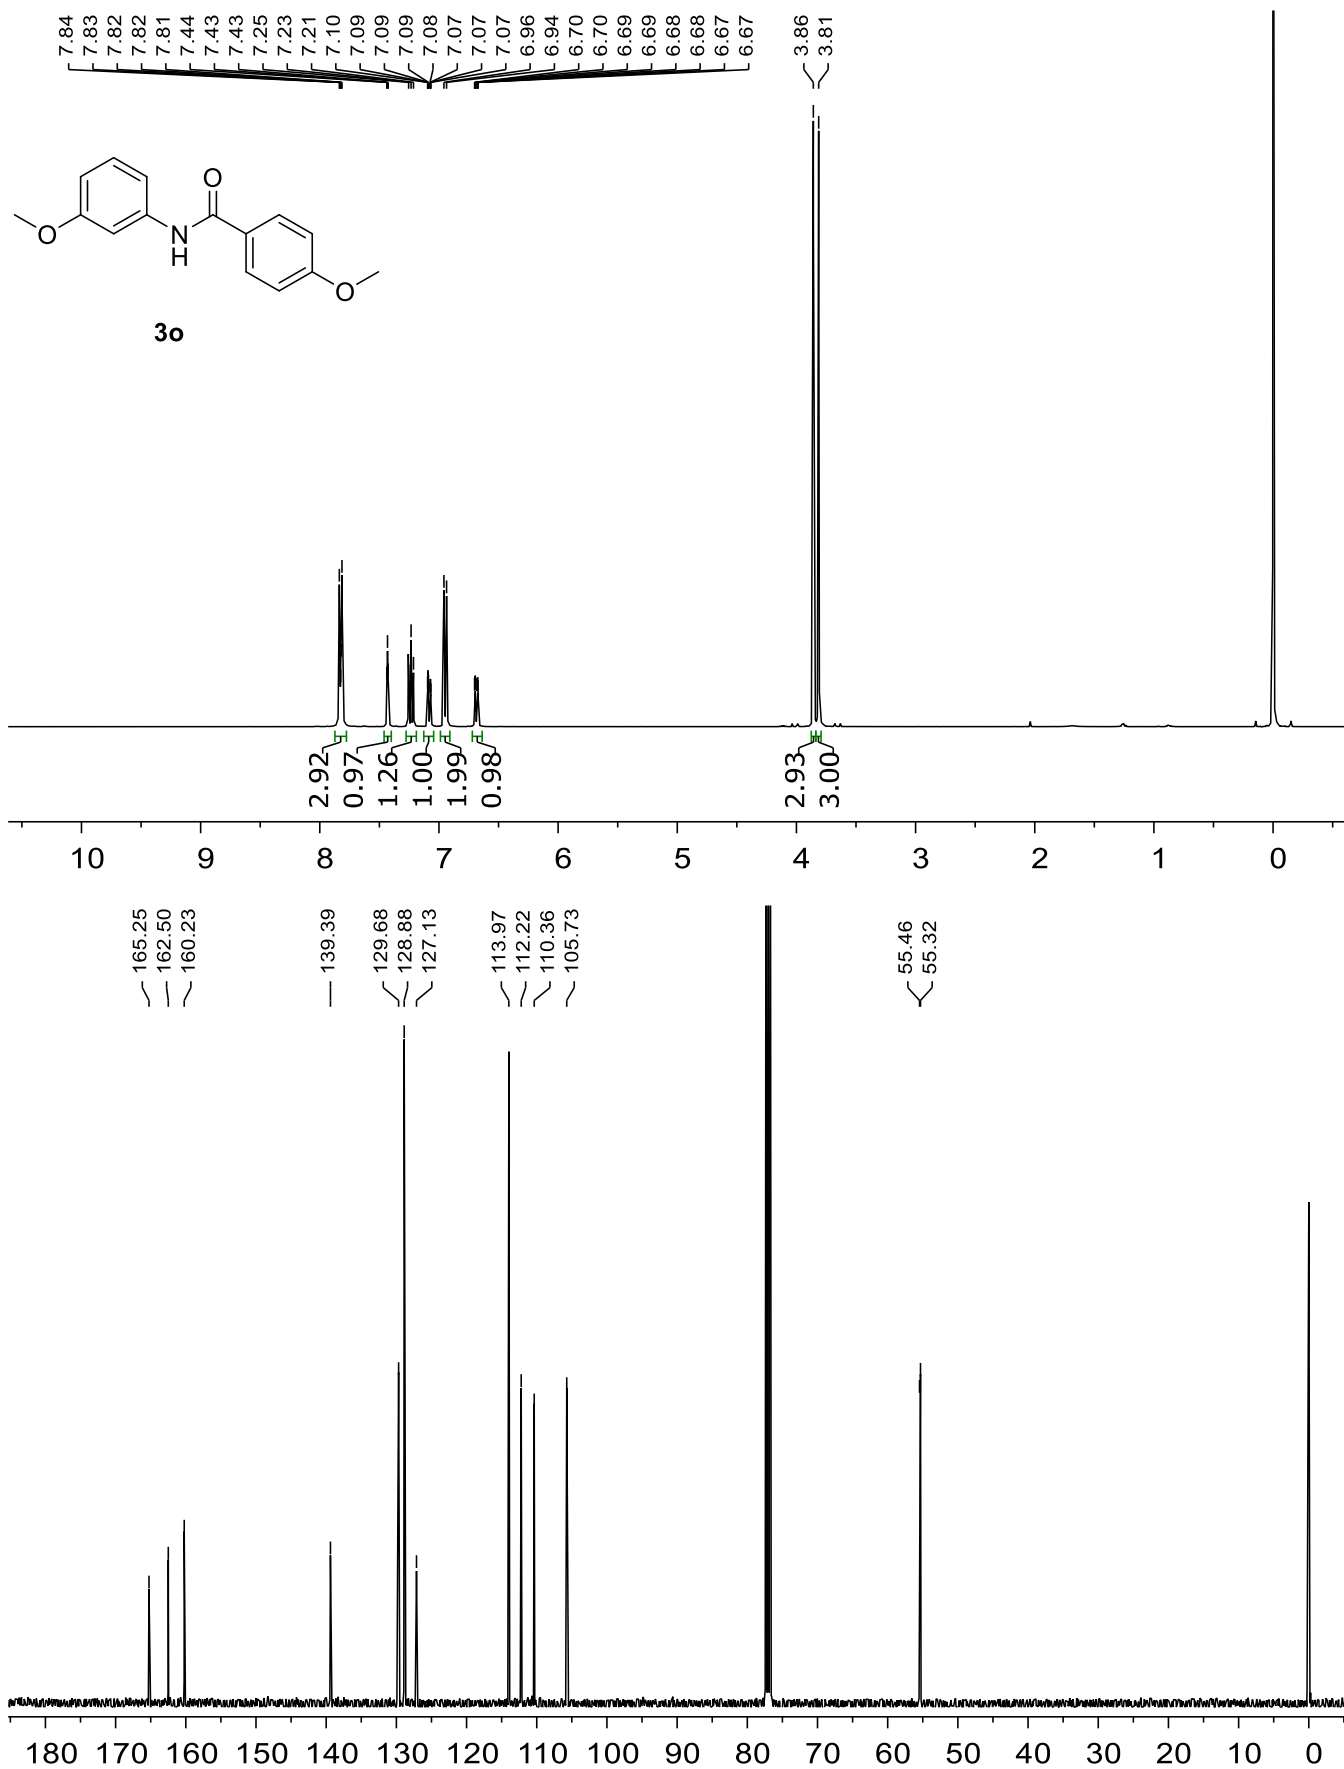

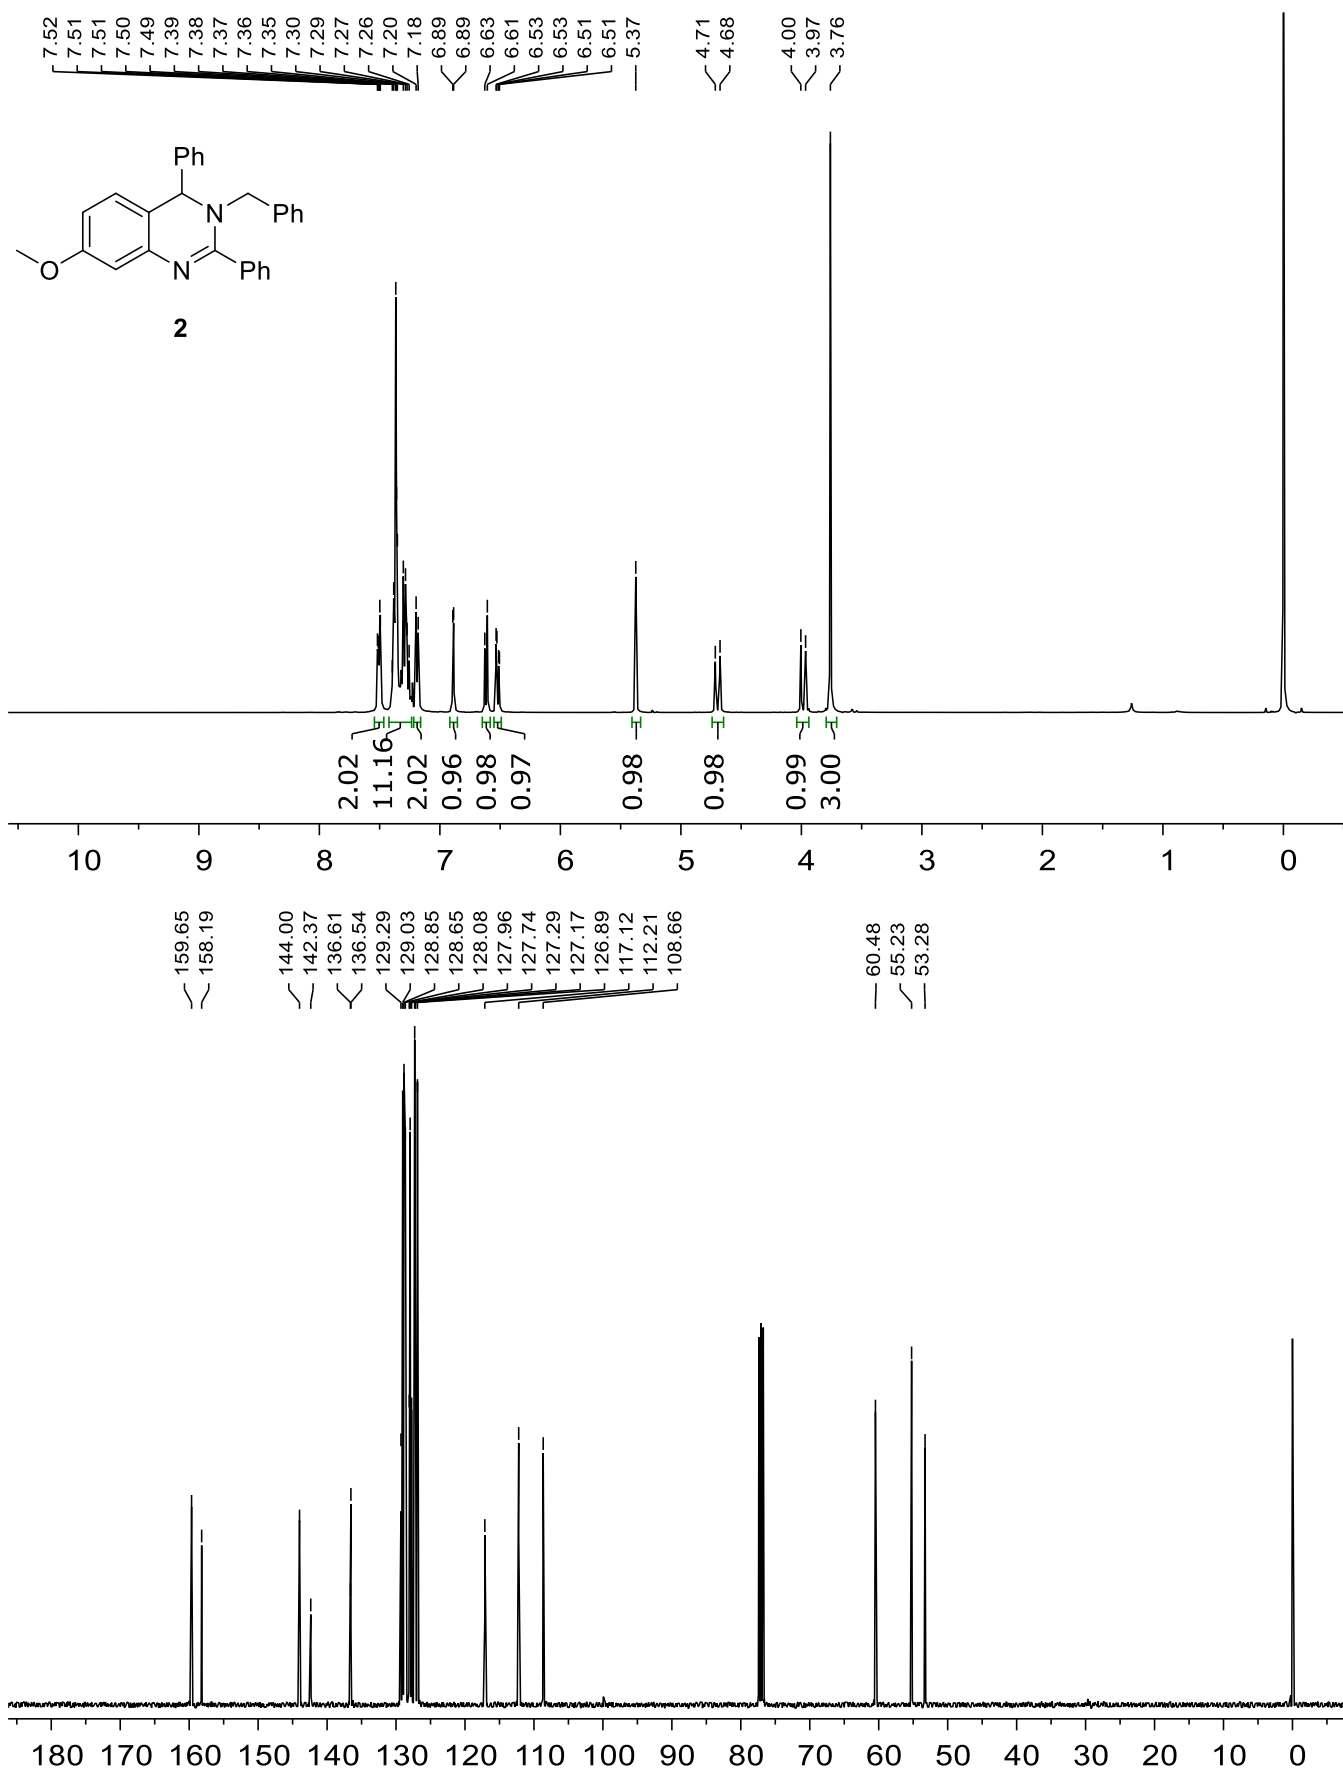

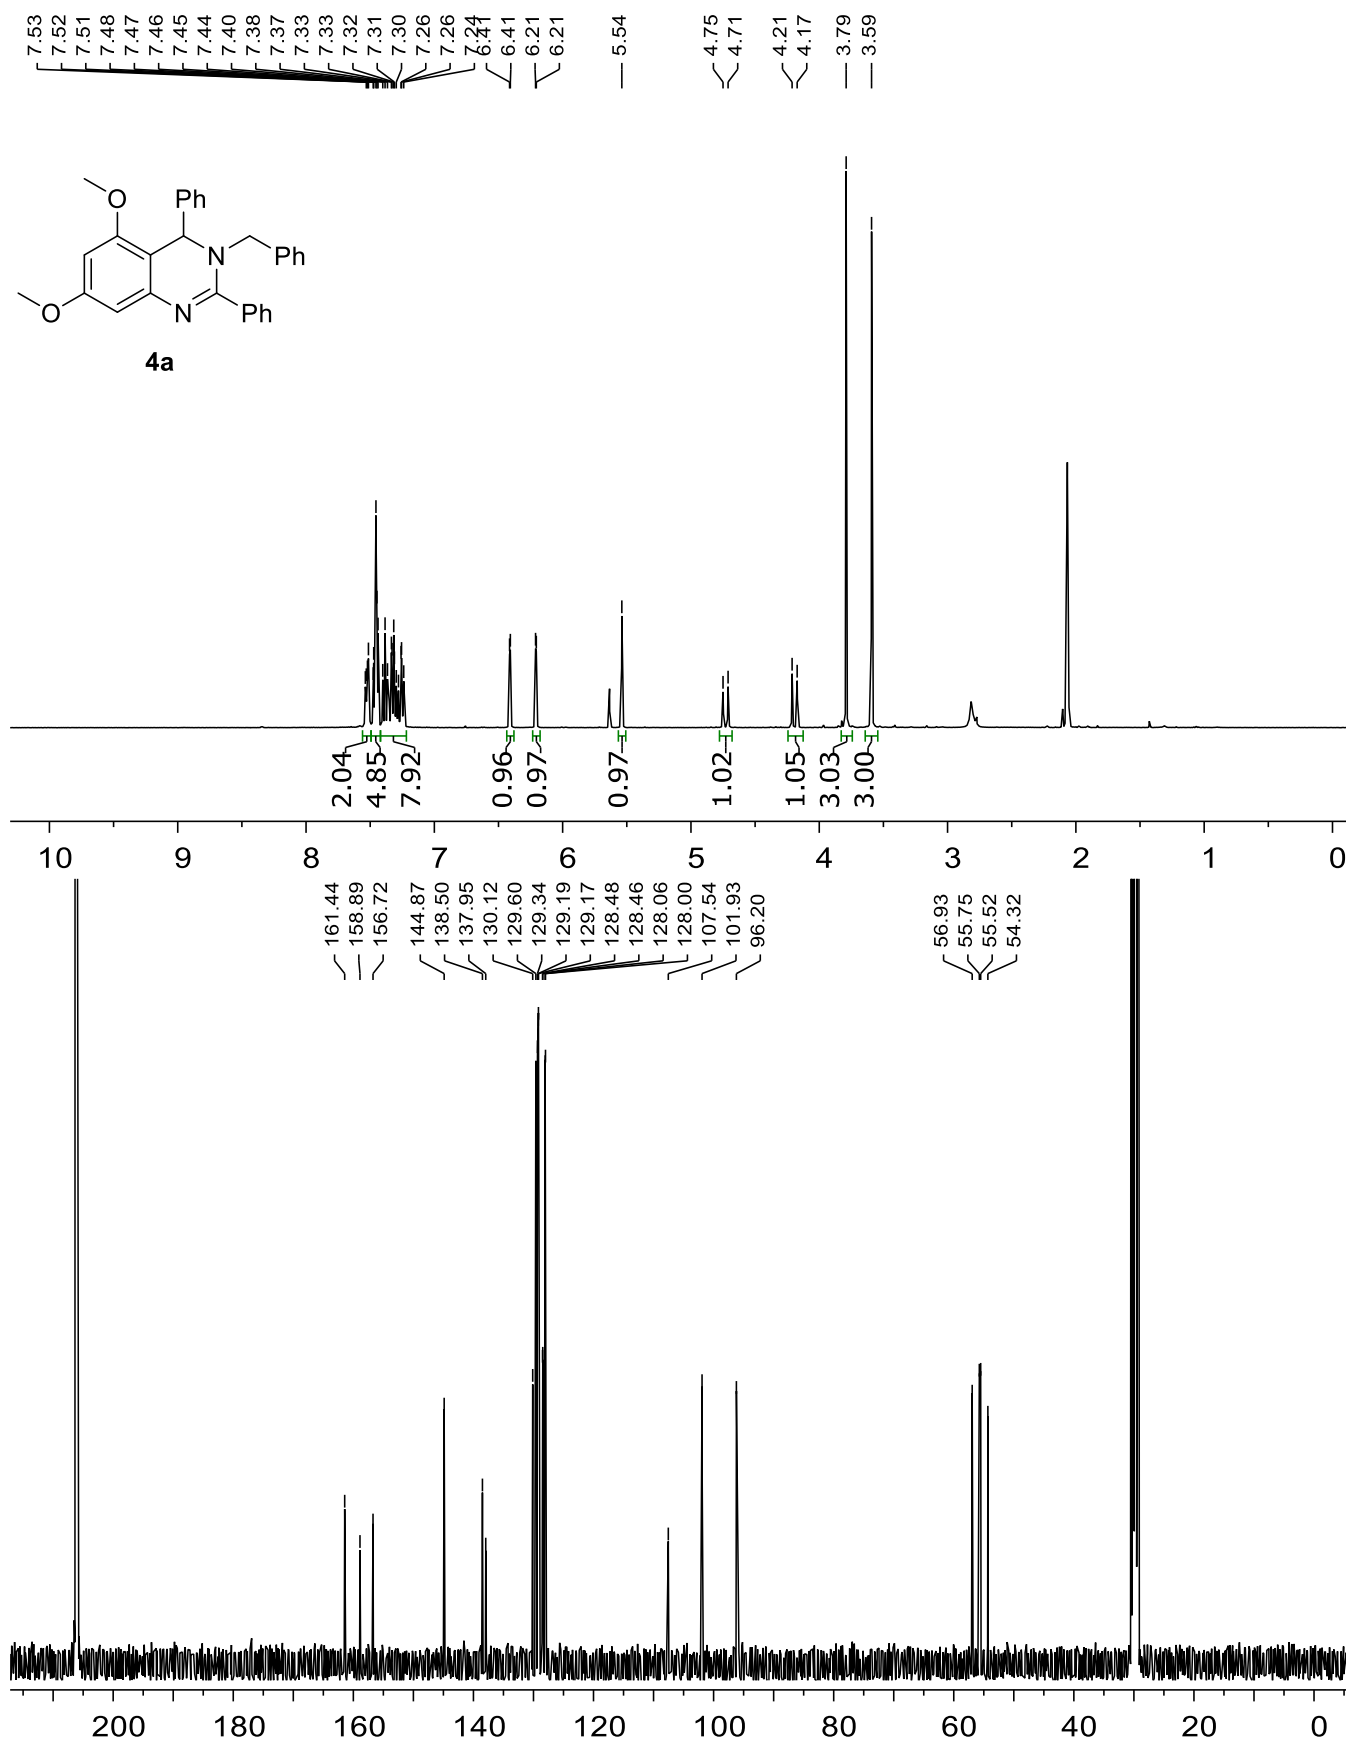

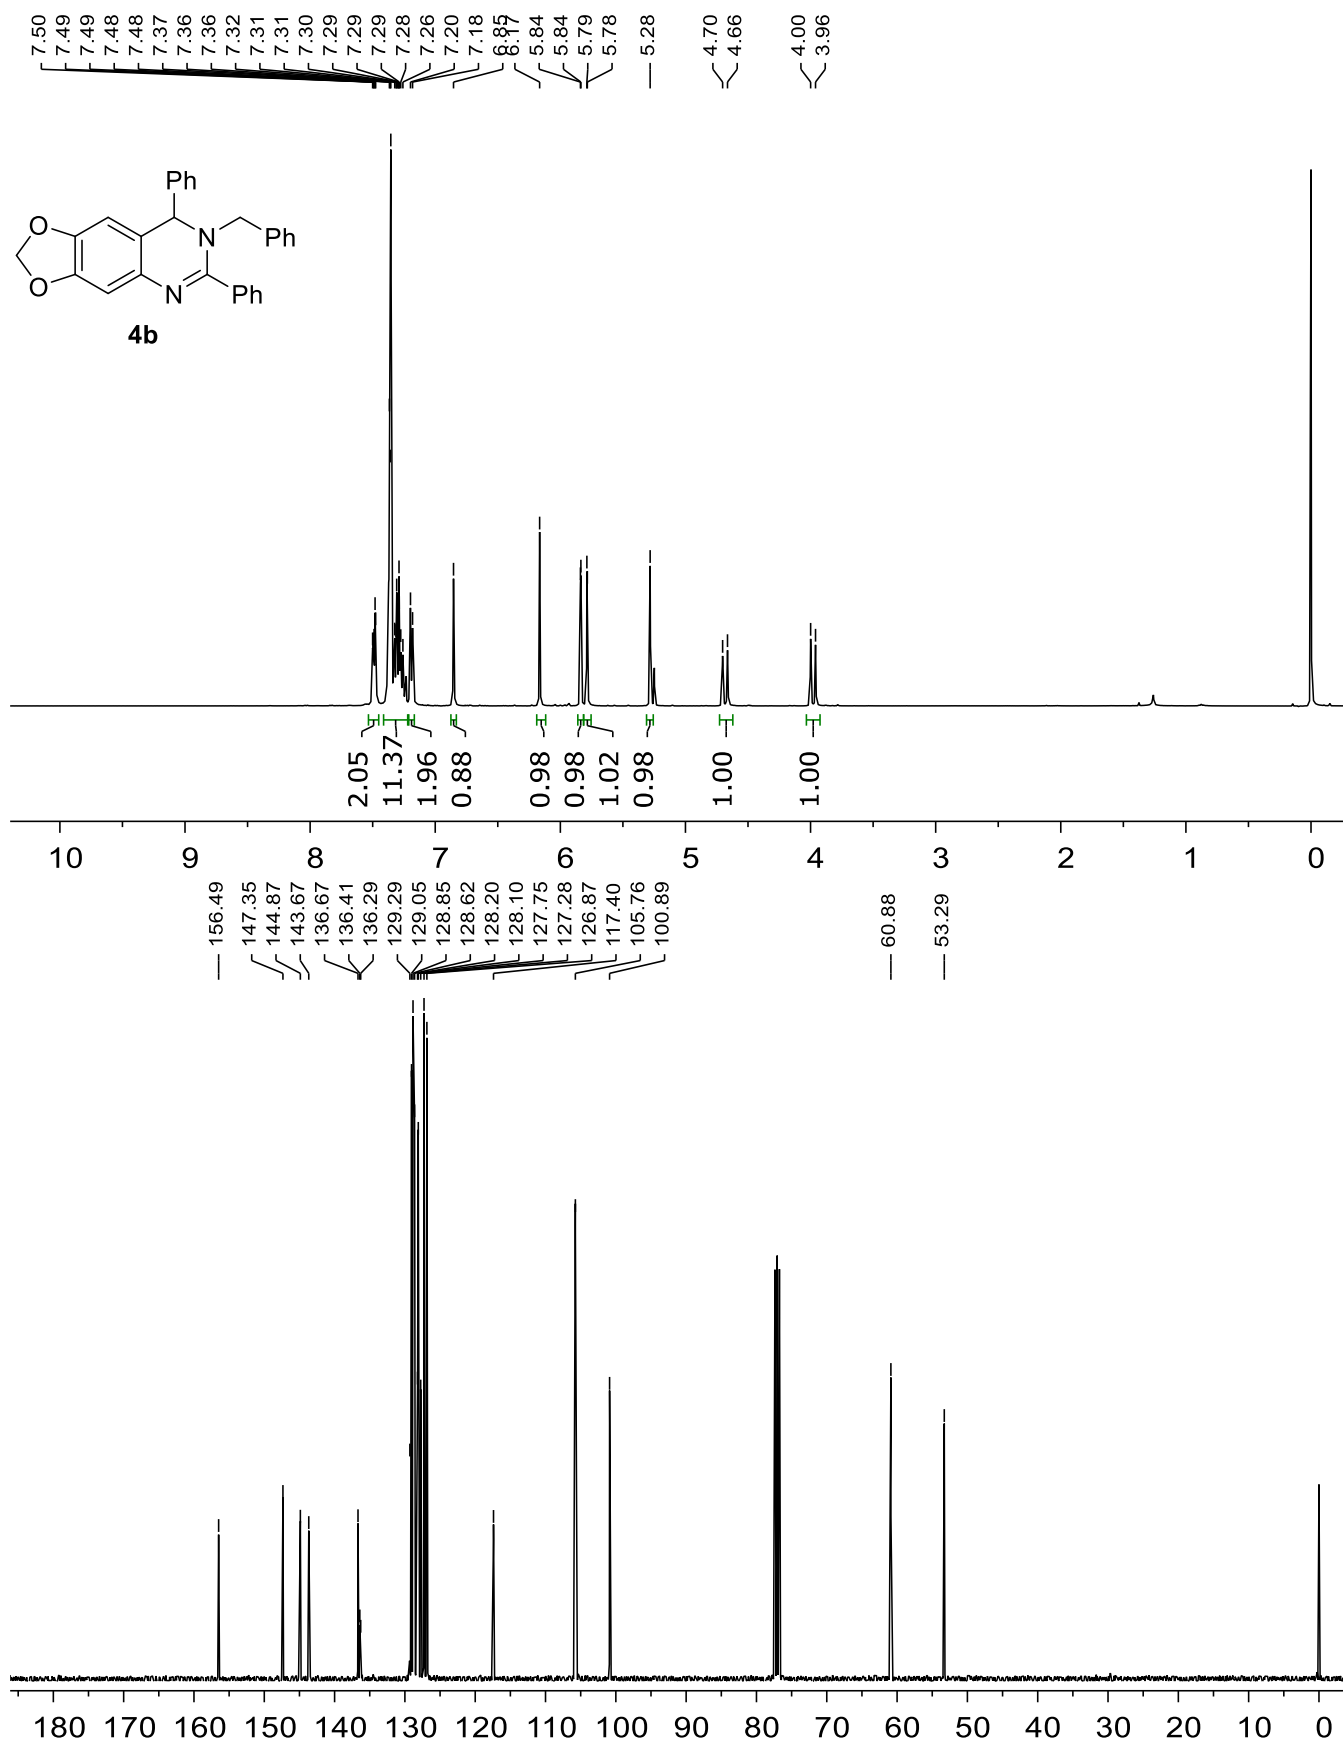

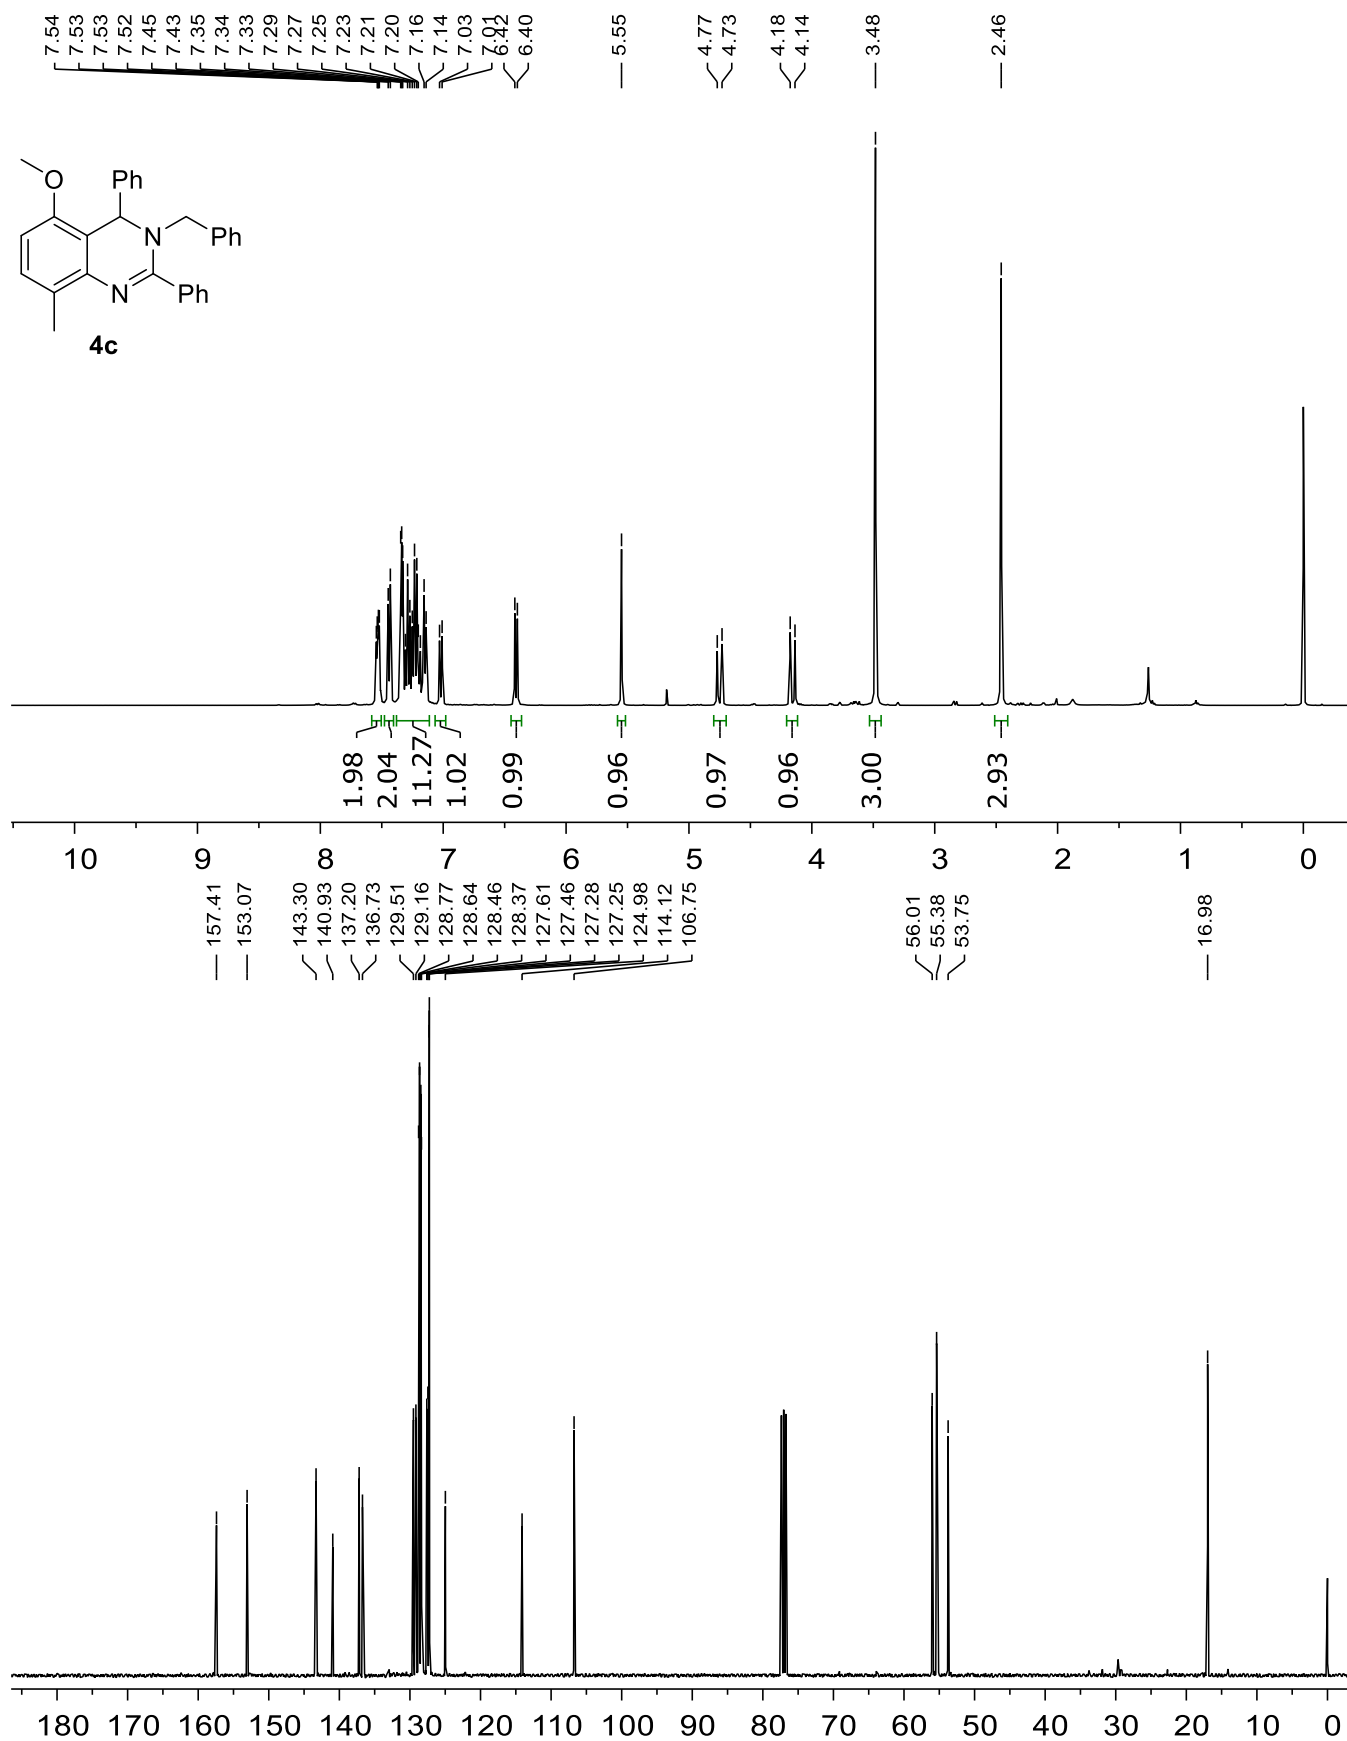

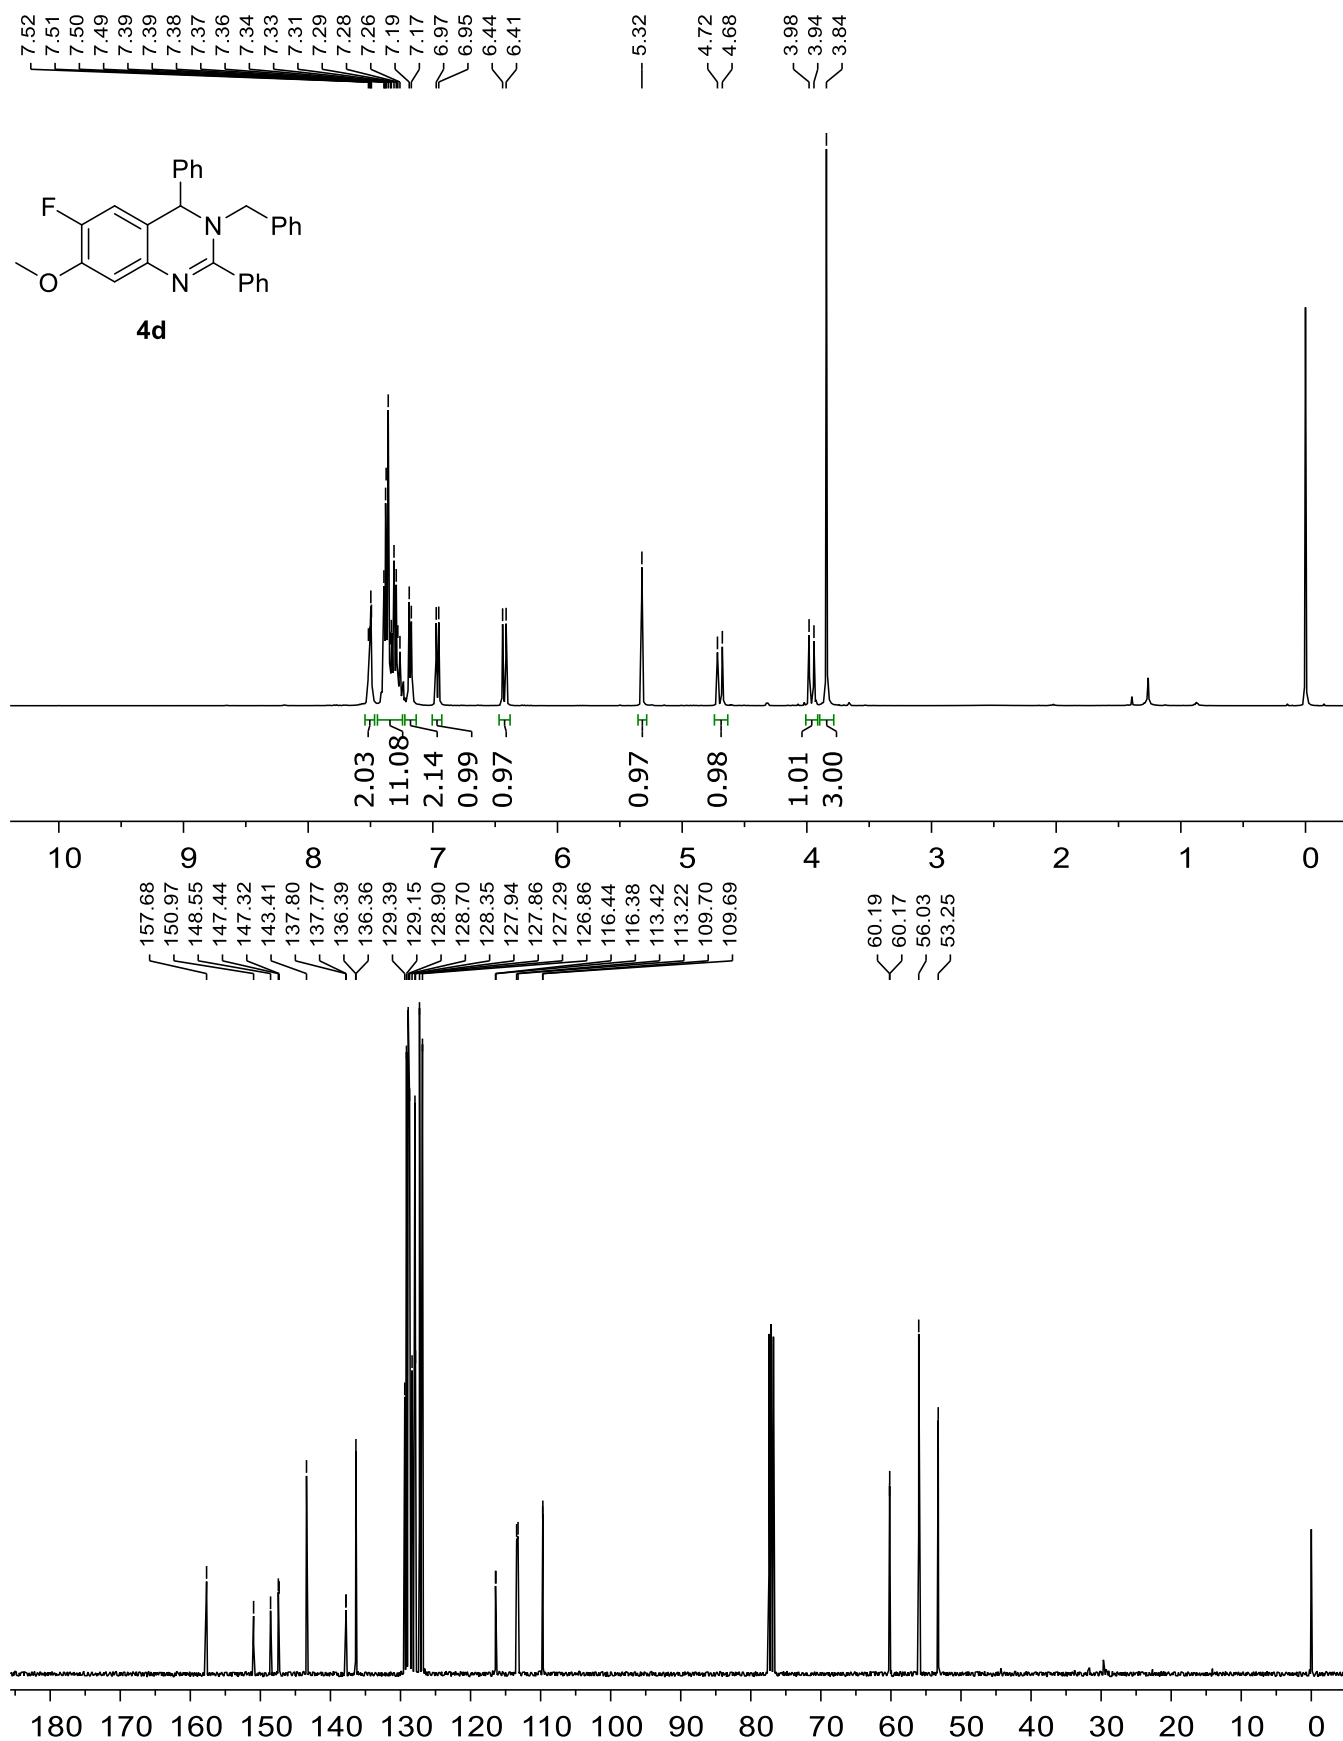

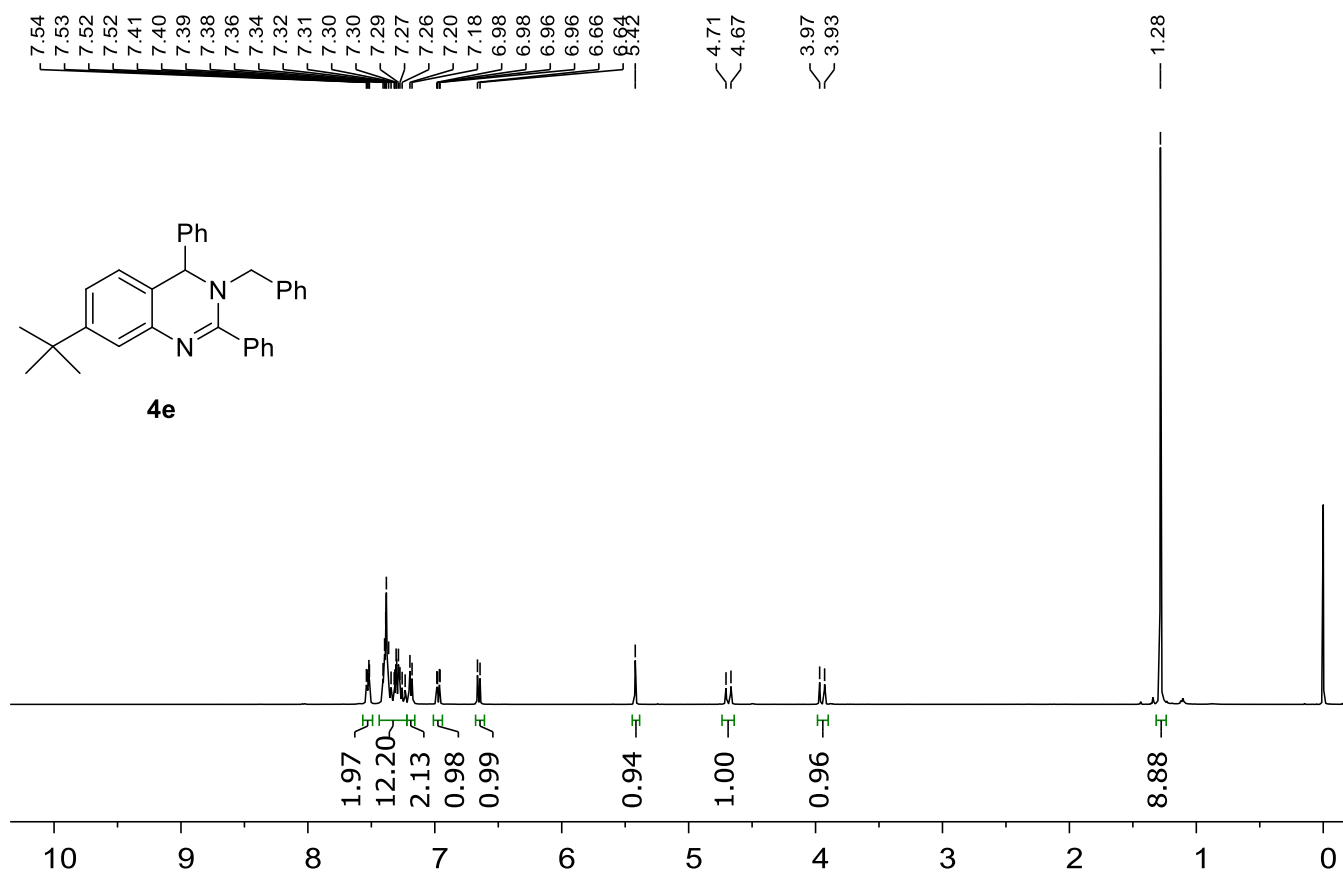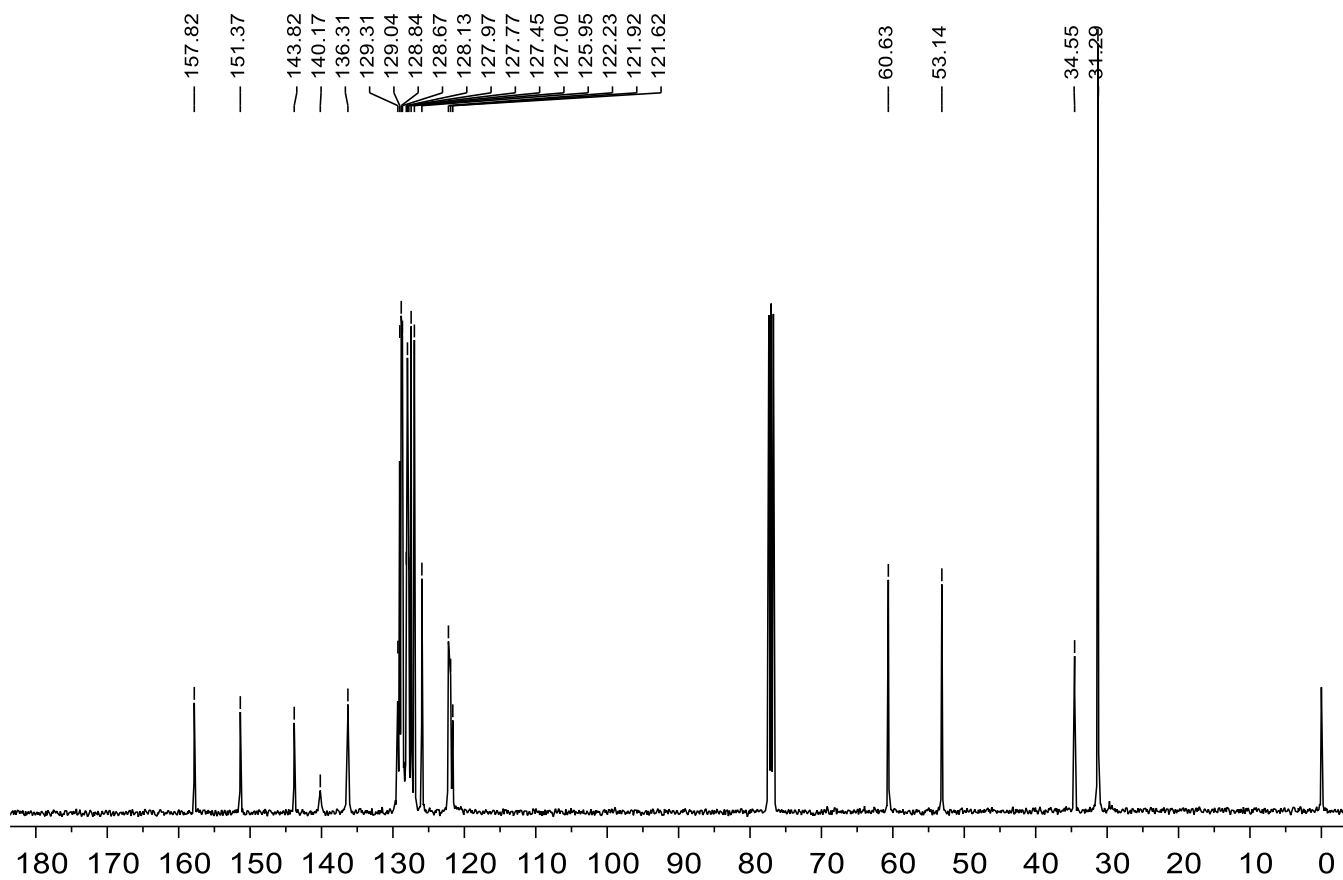

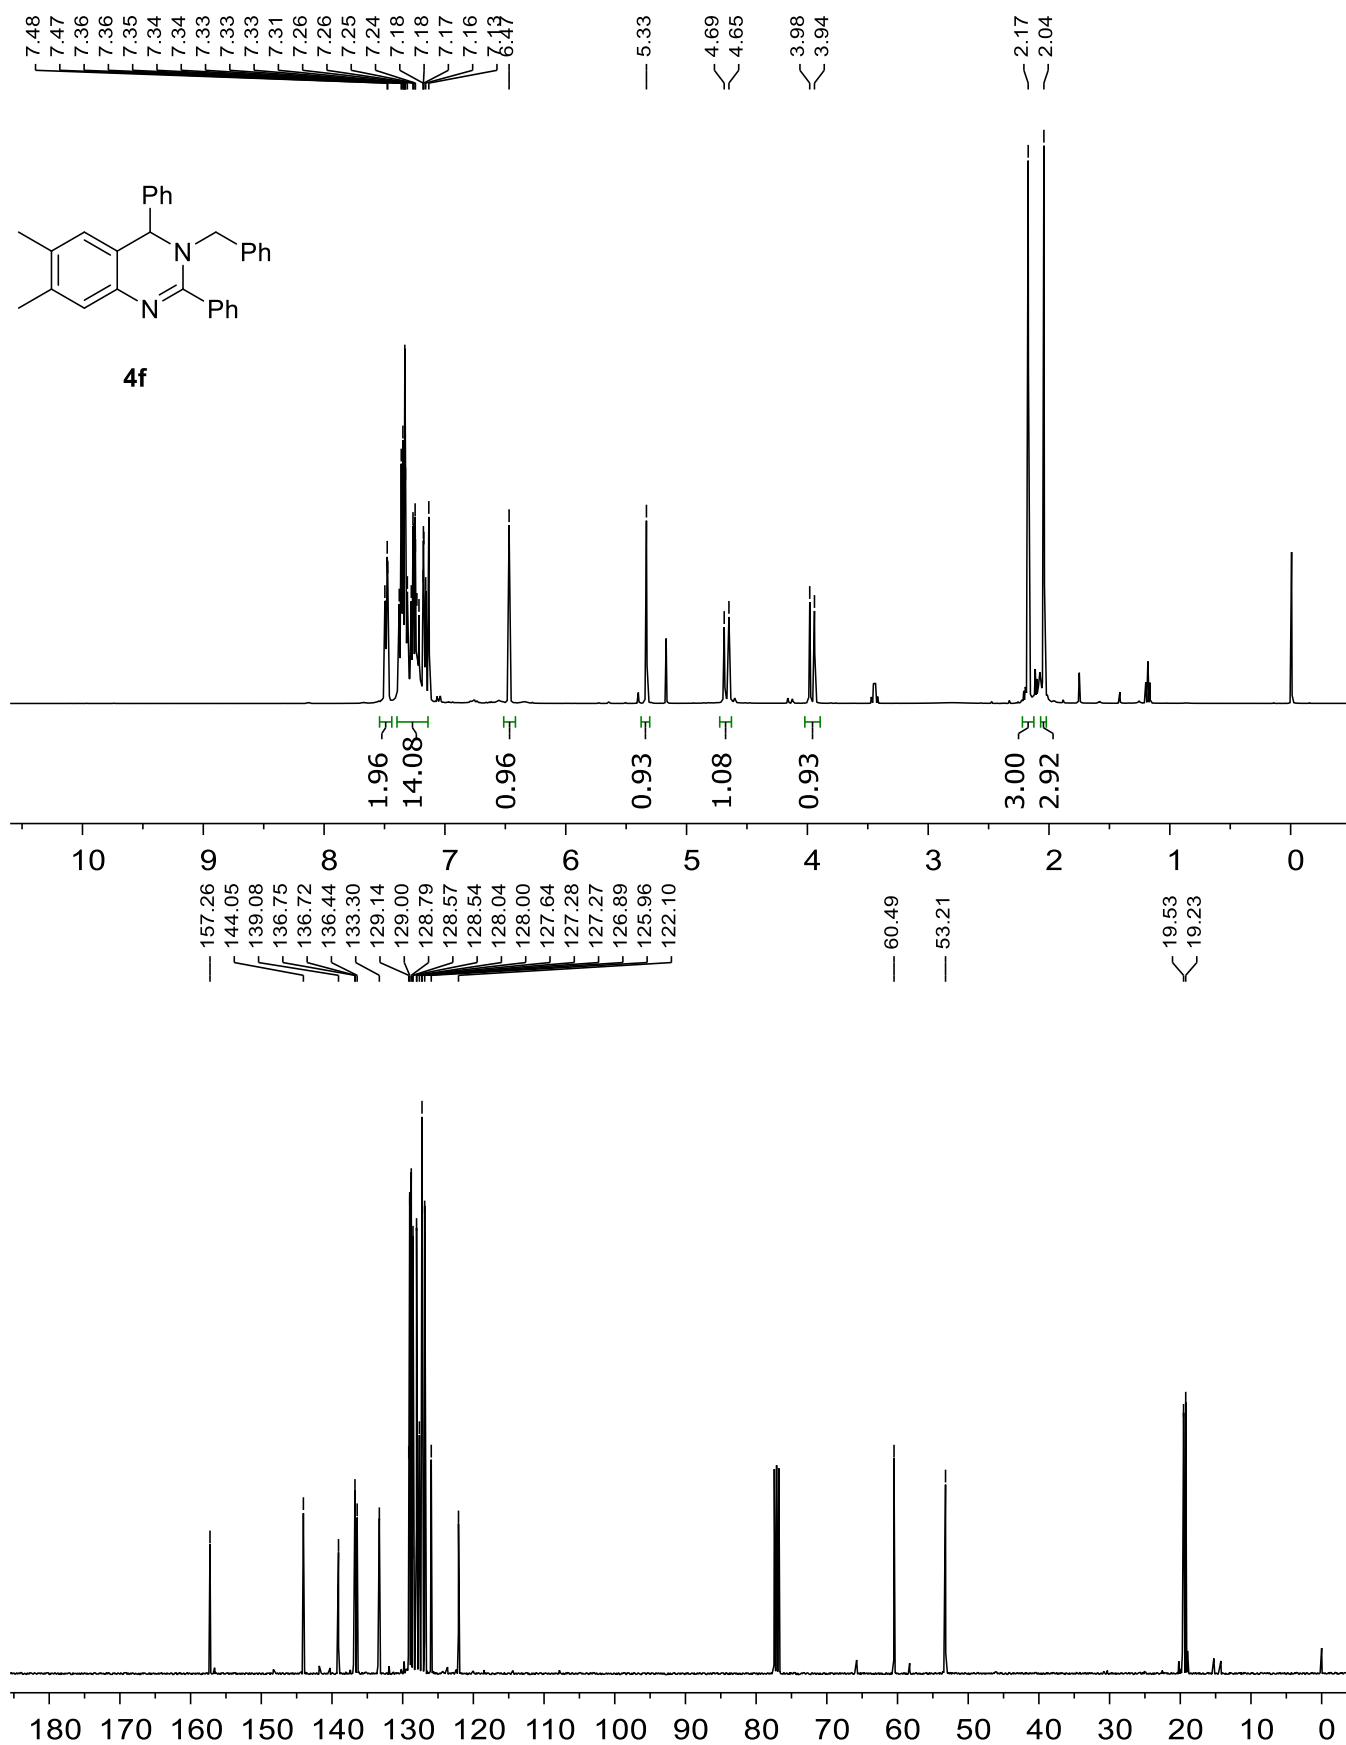

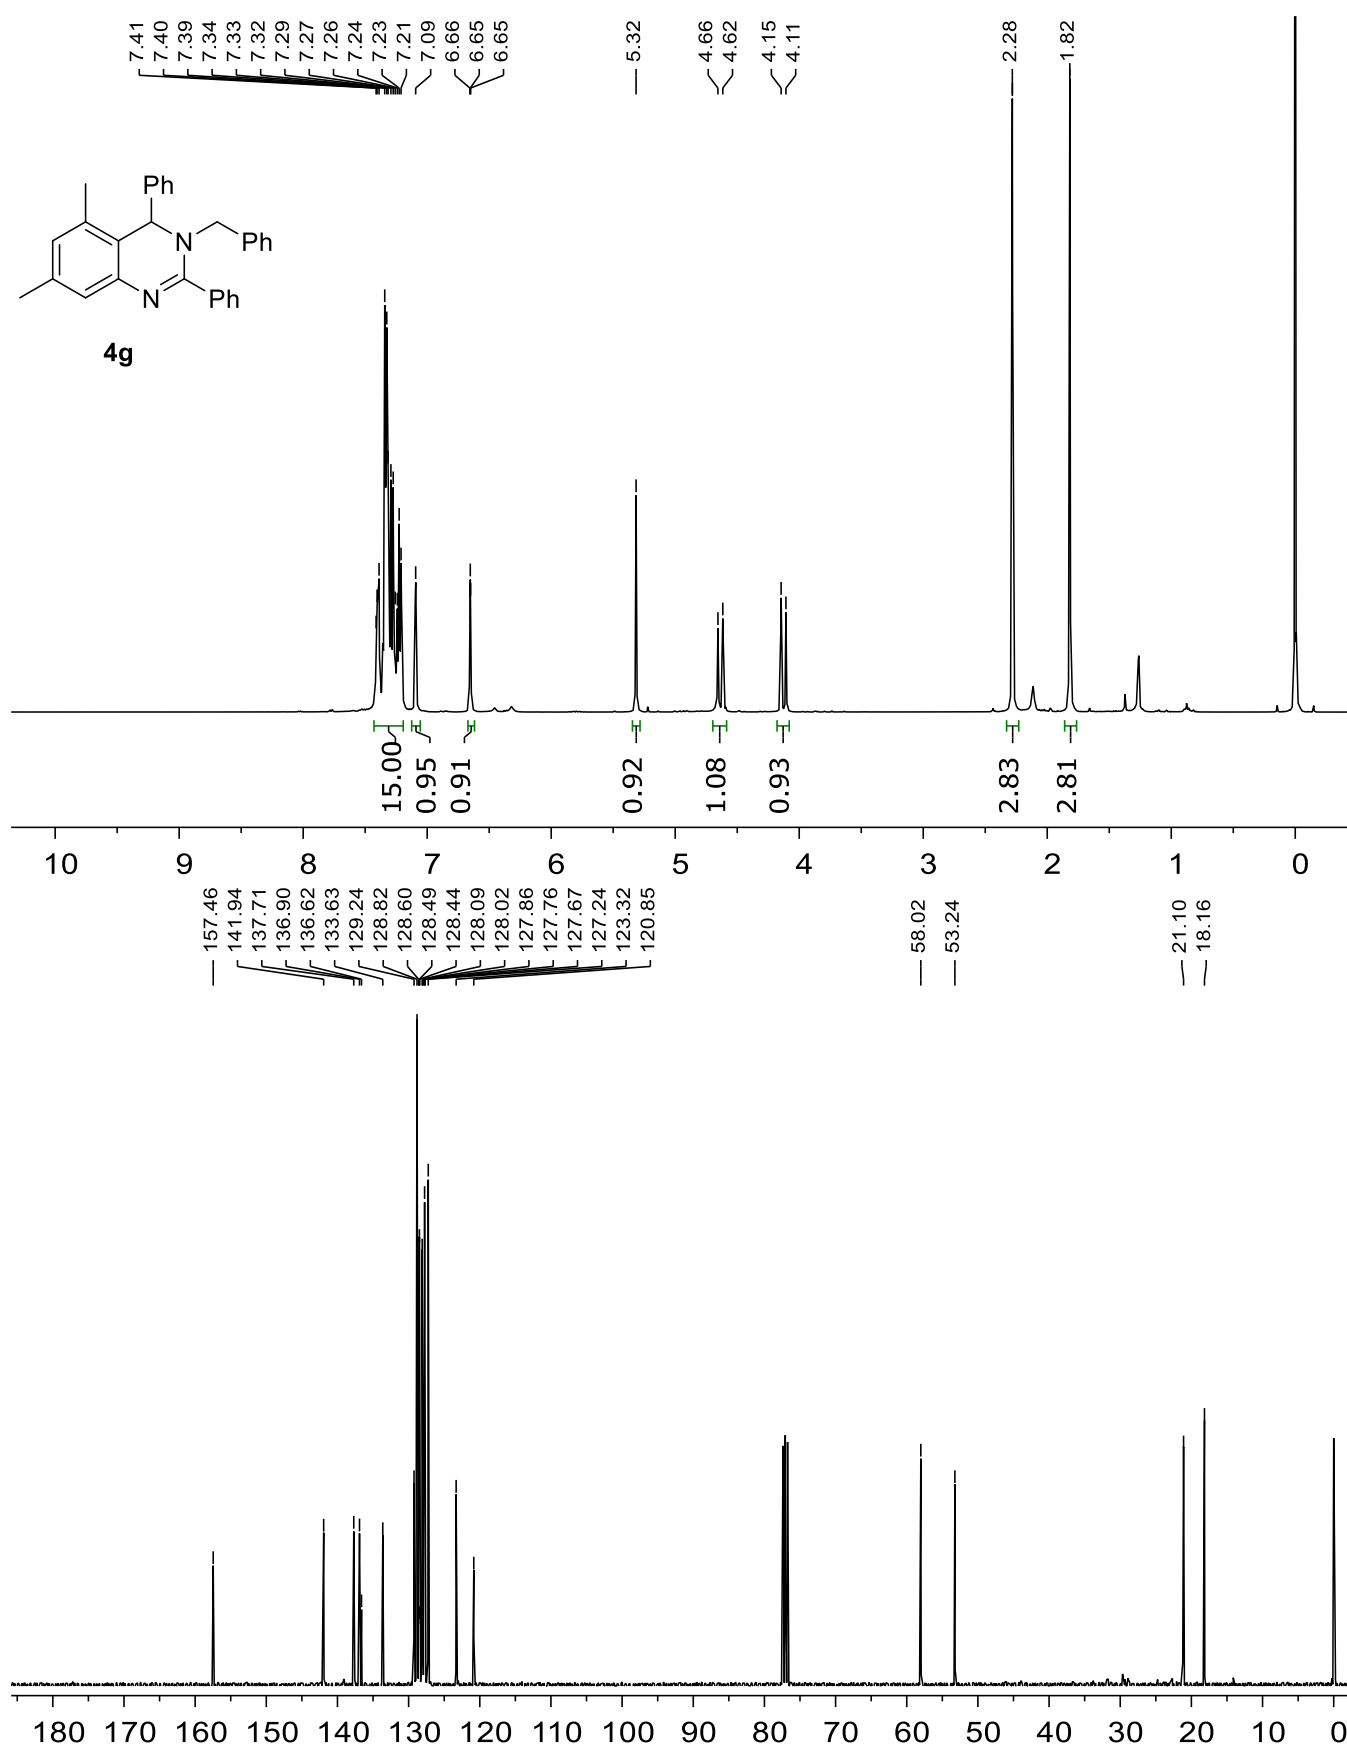

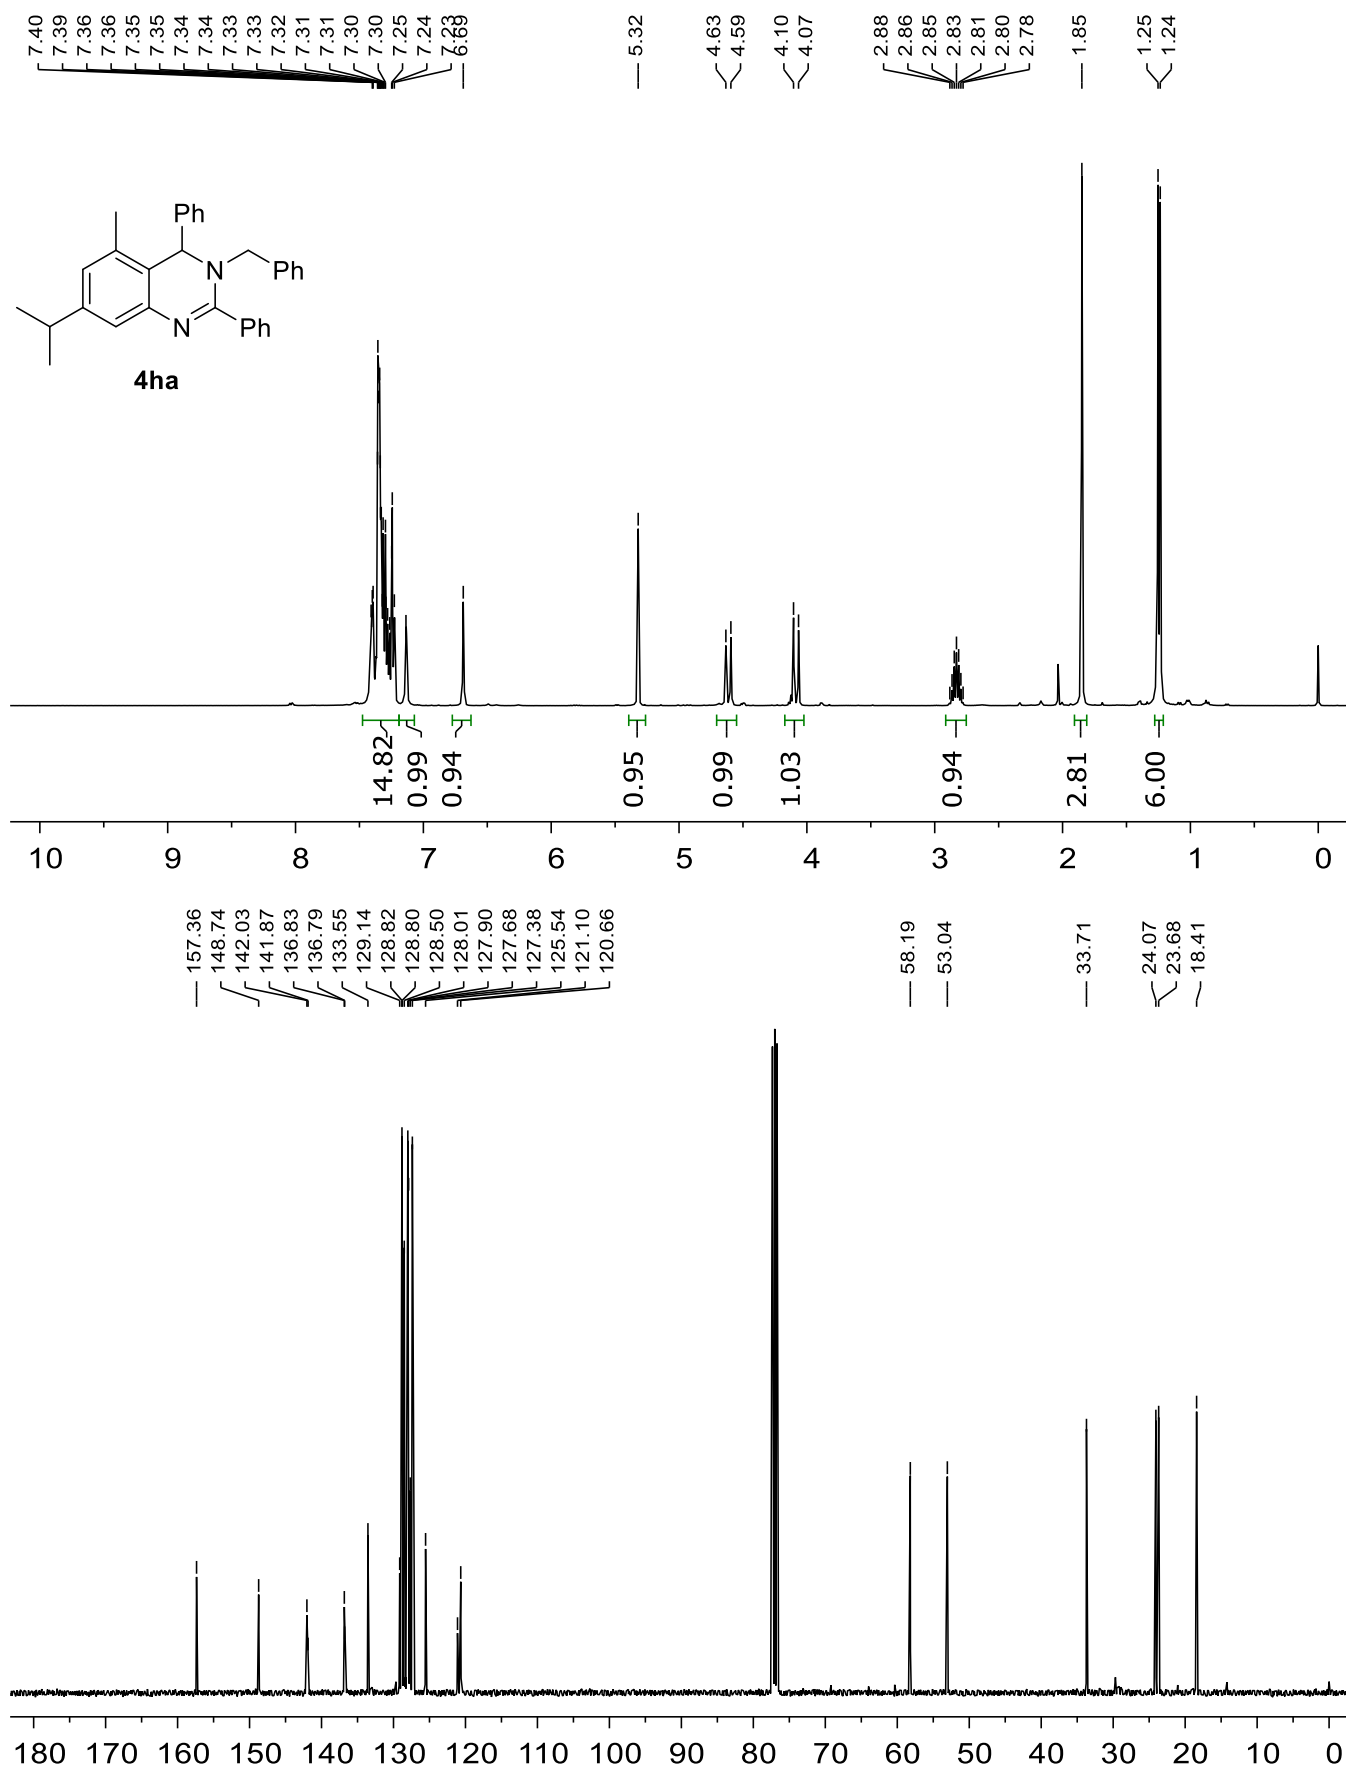

# NOESY Spectrum of **4ha**

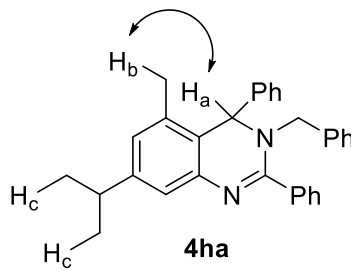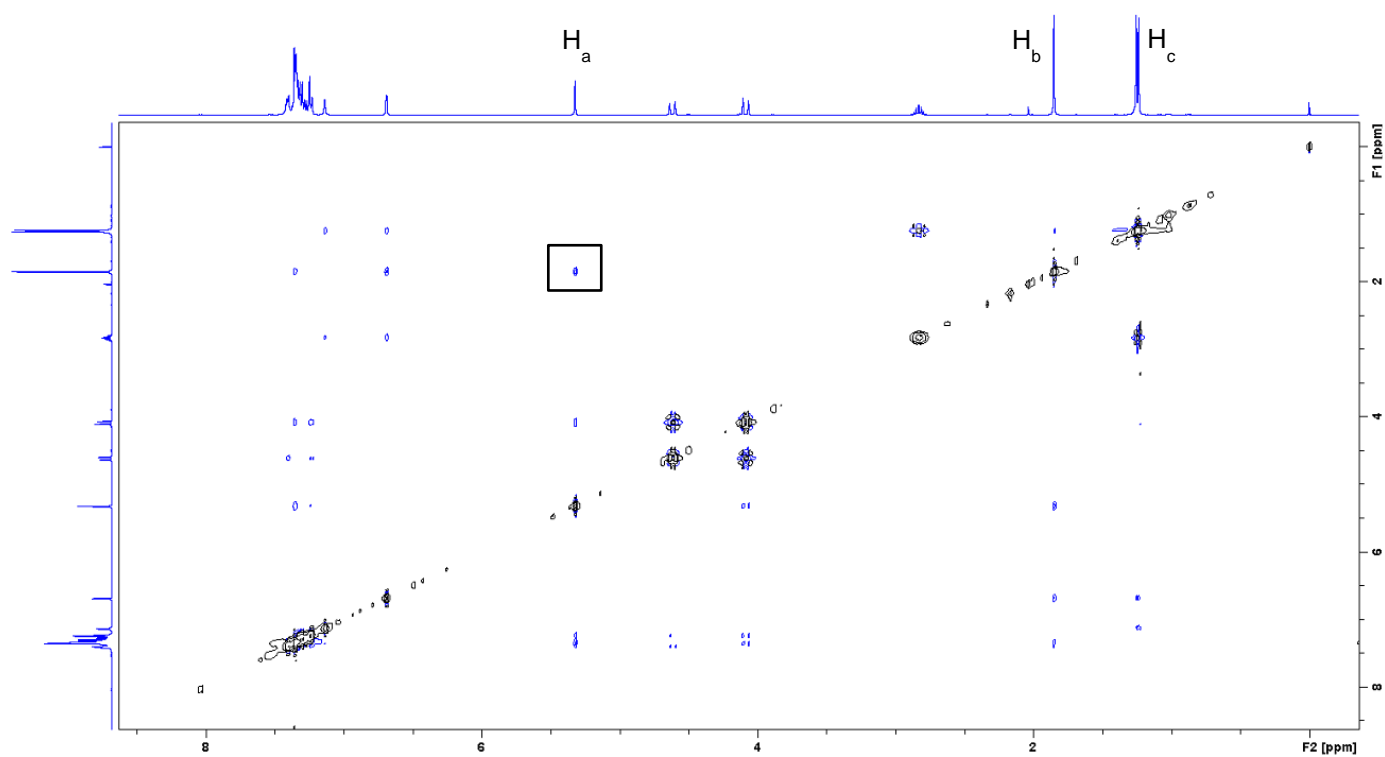

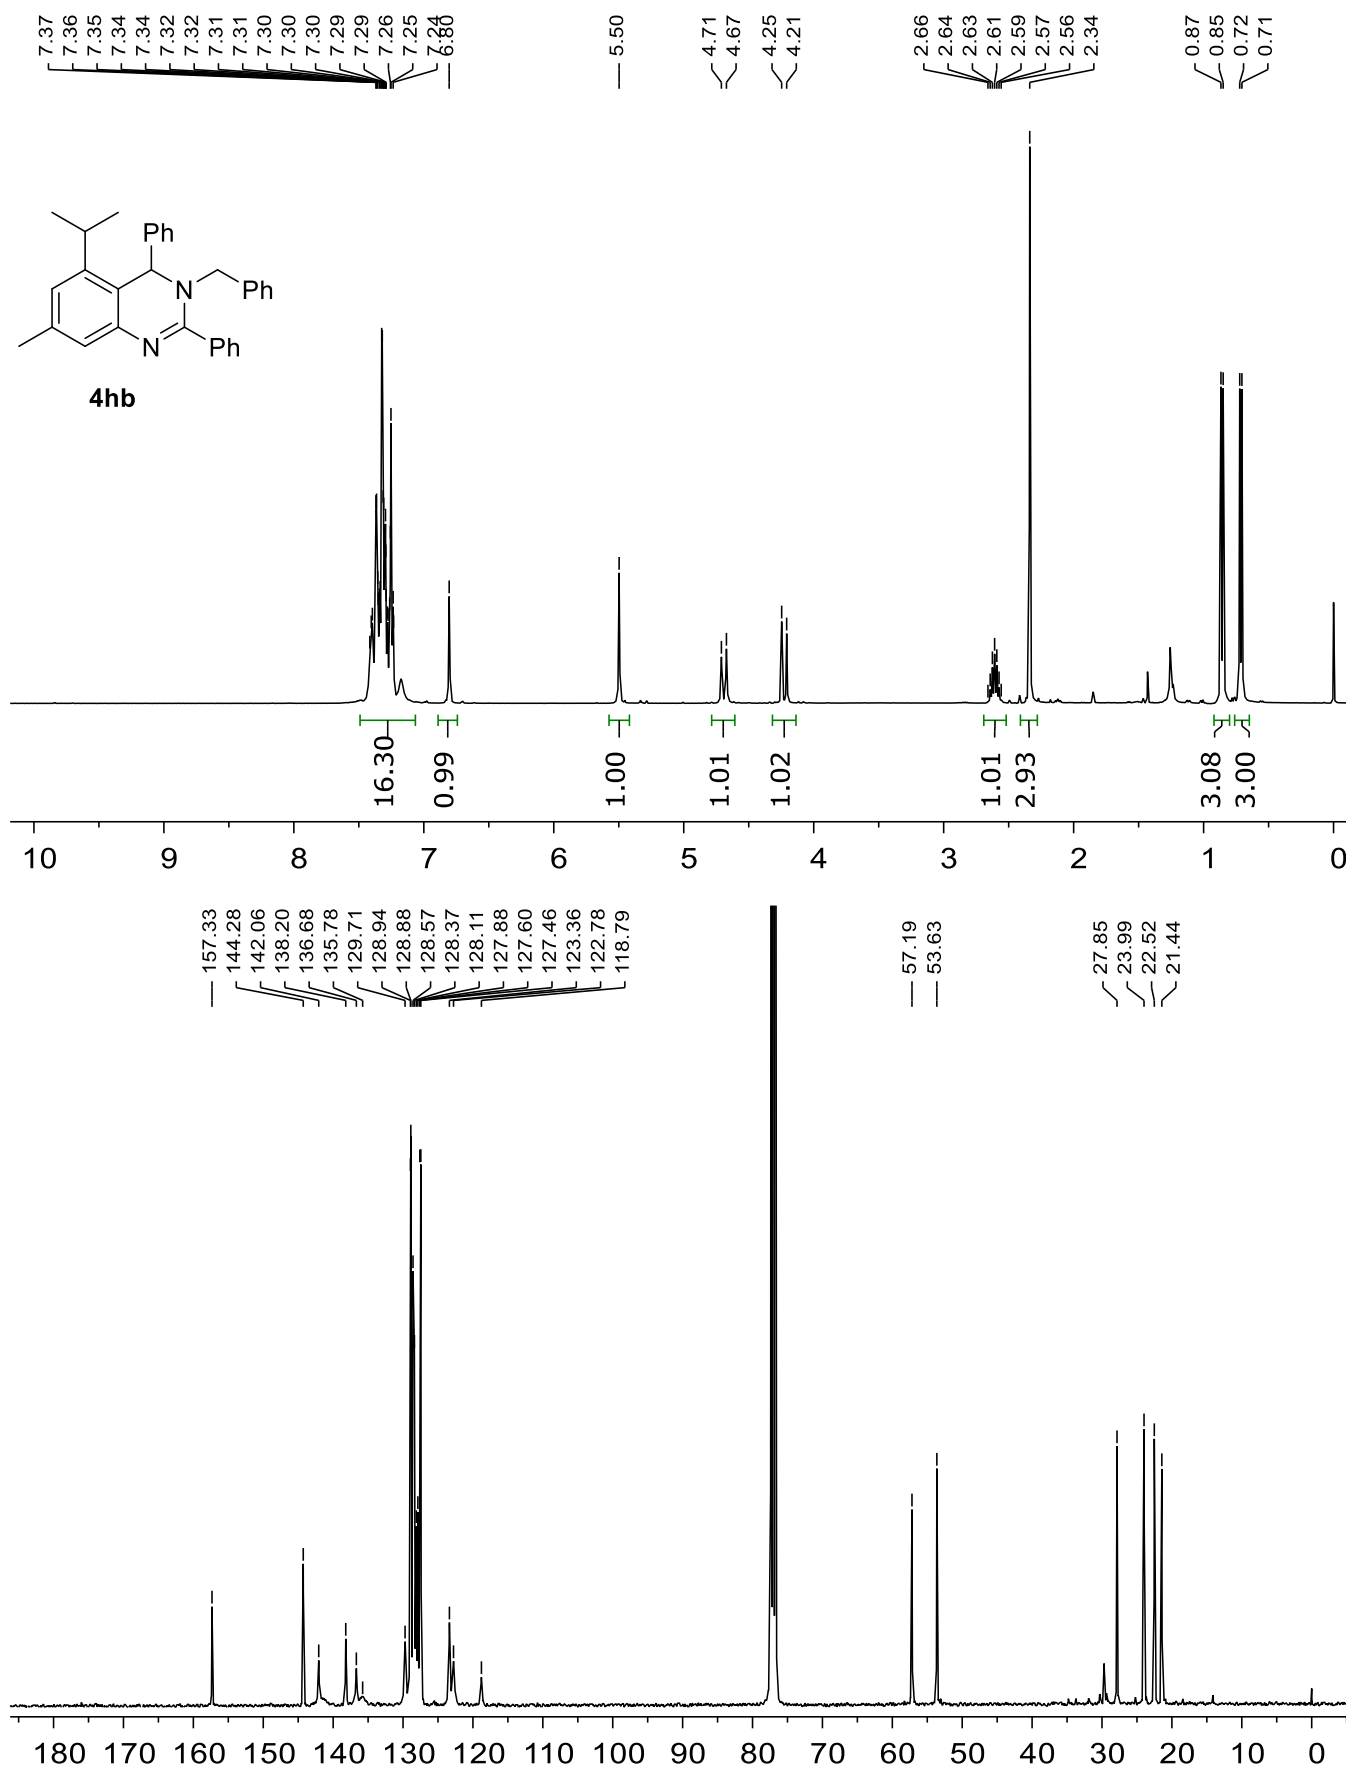

# NOESY Spectrum of **4hb**

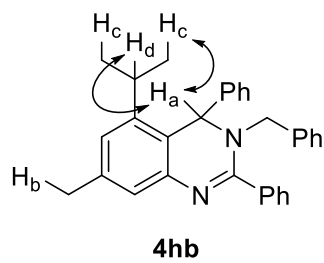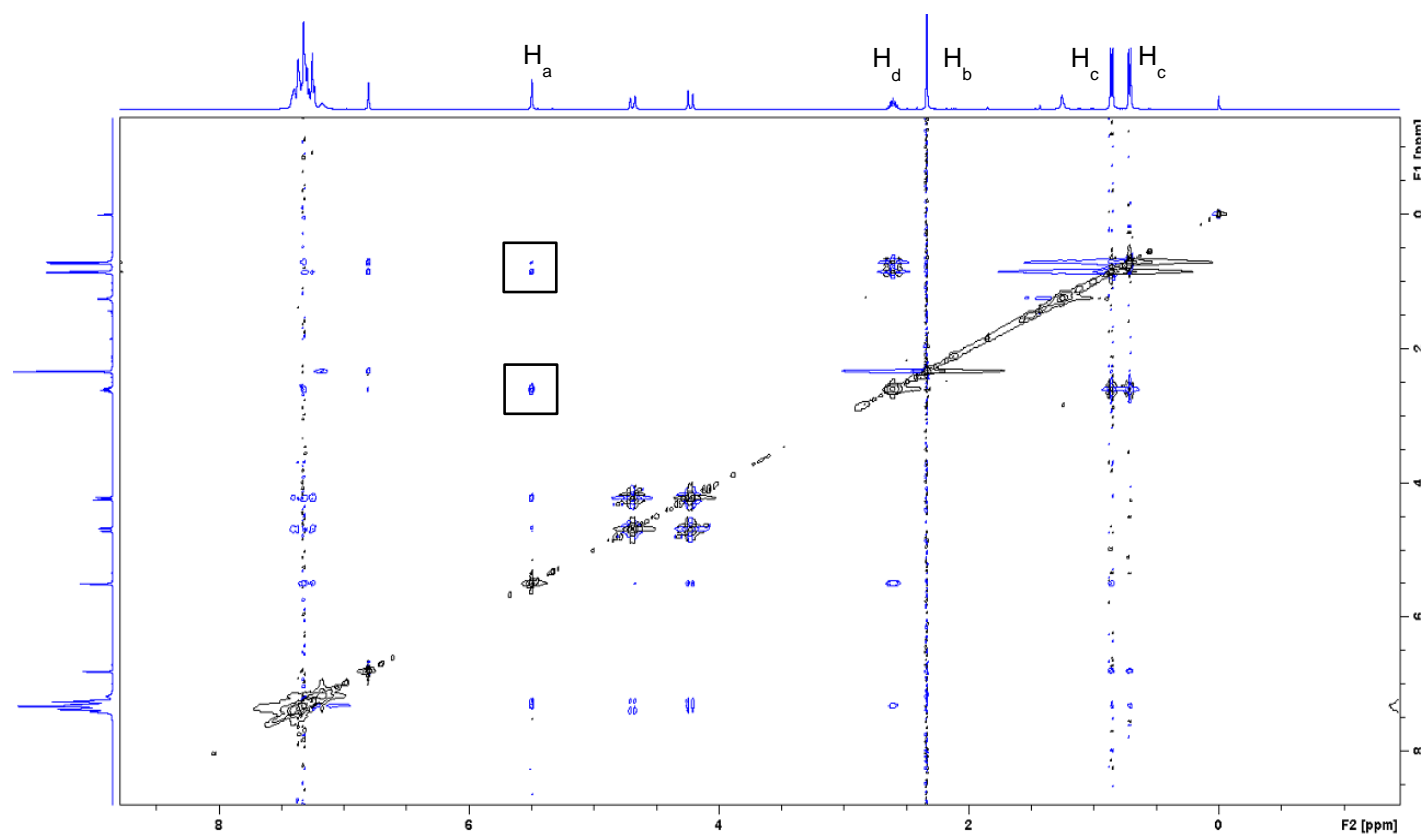

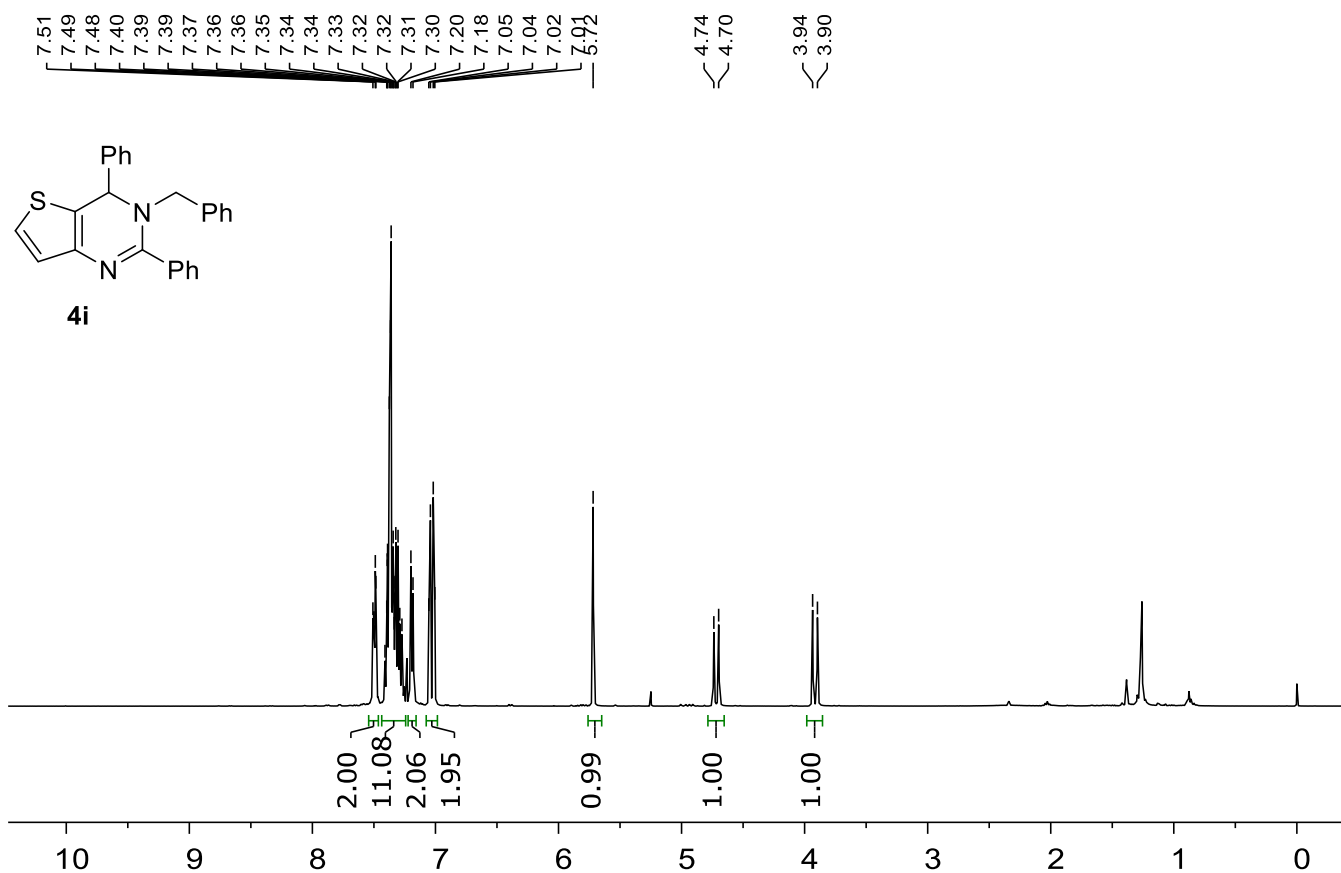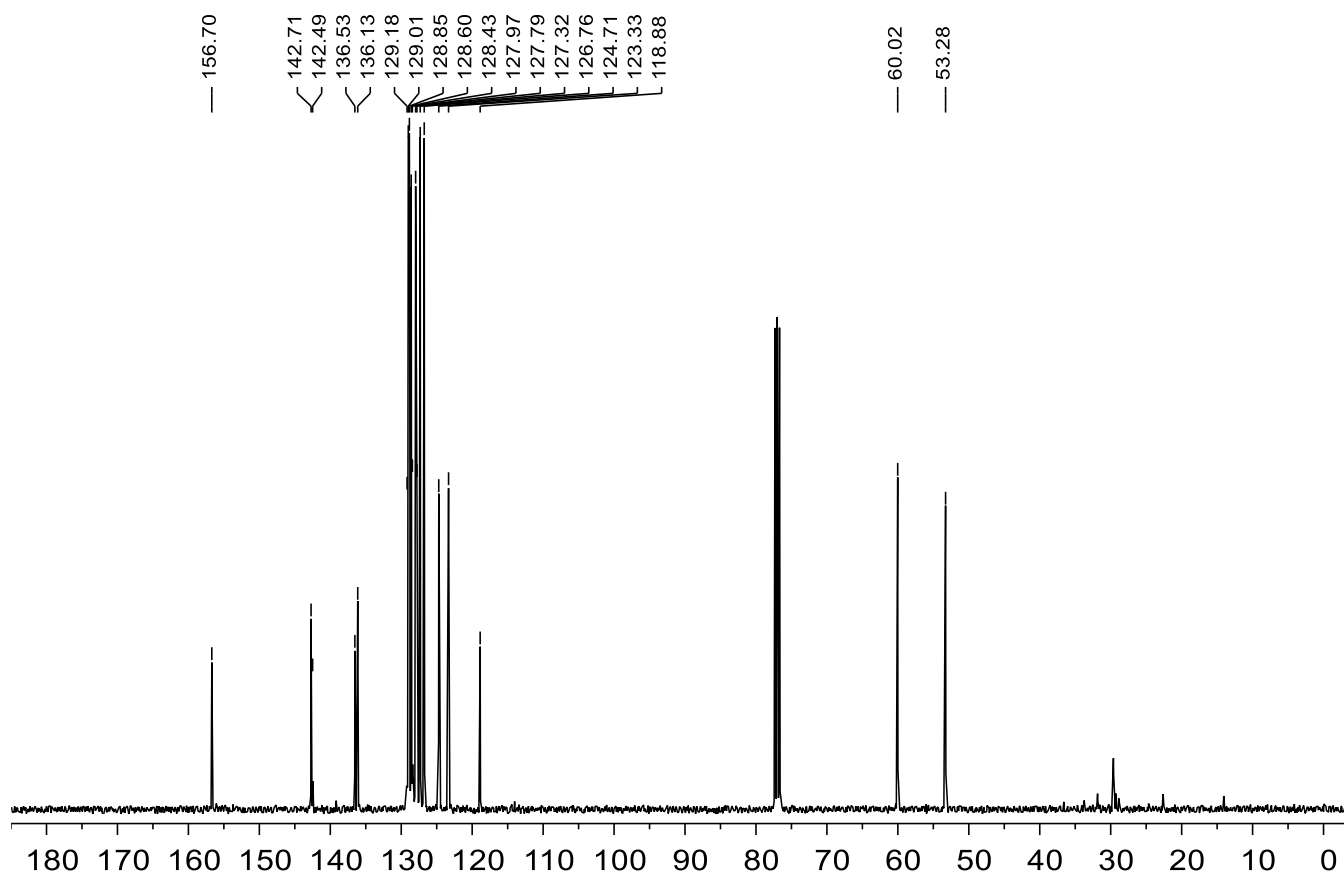

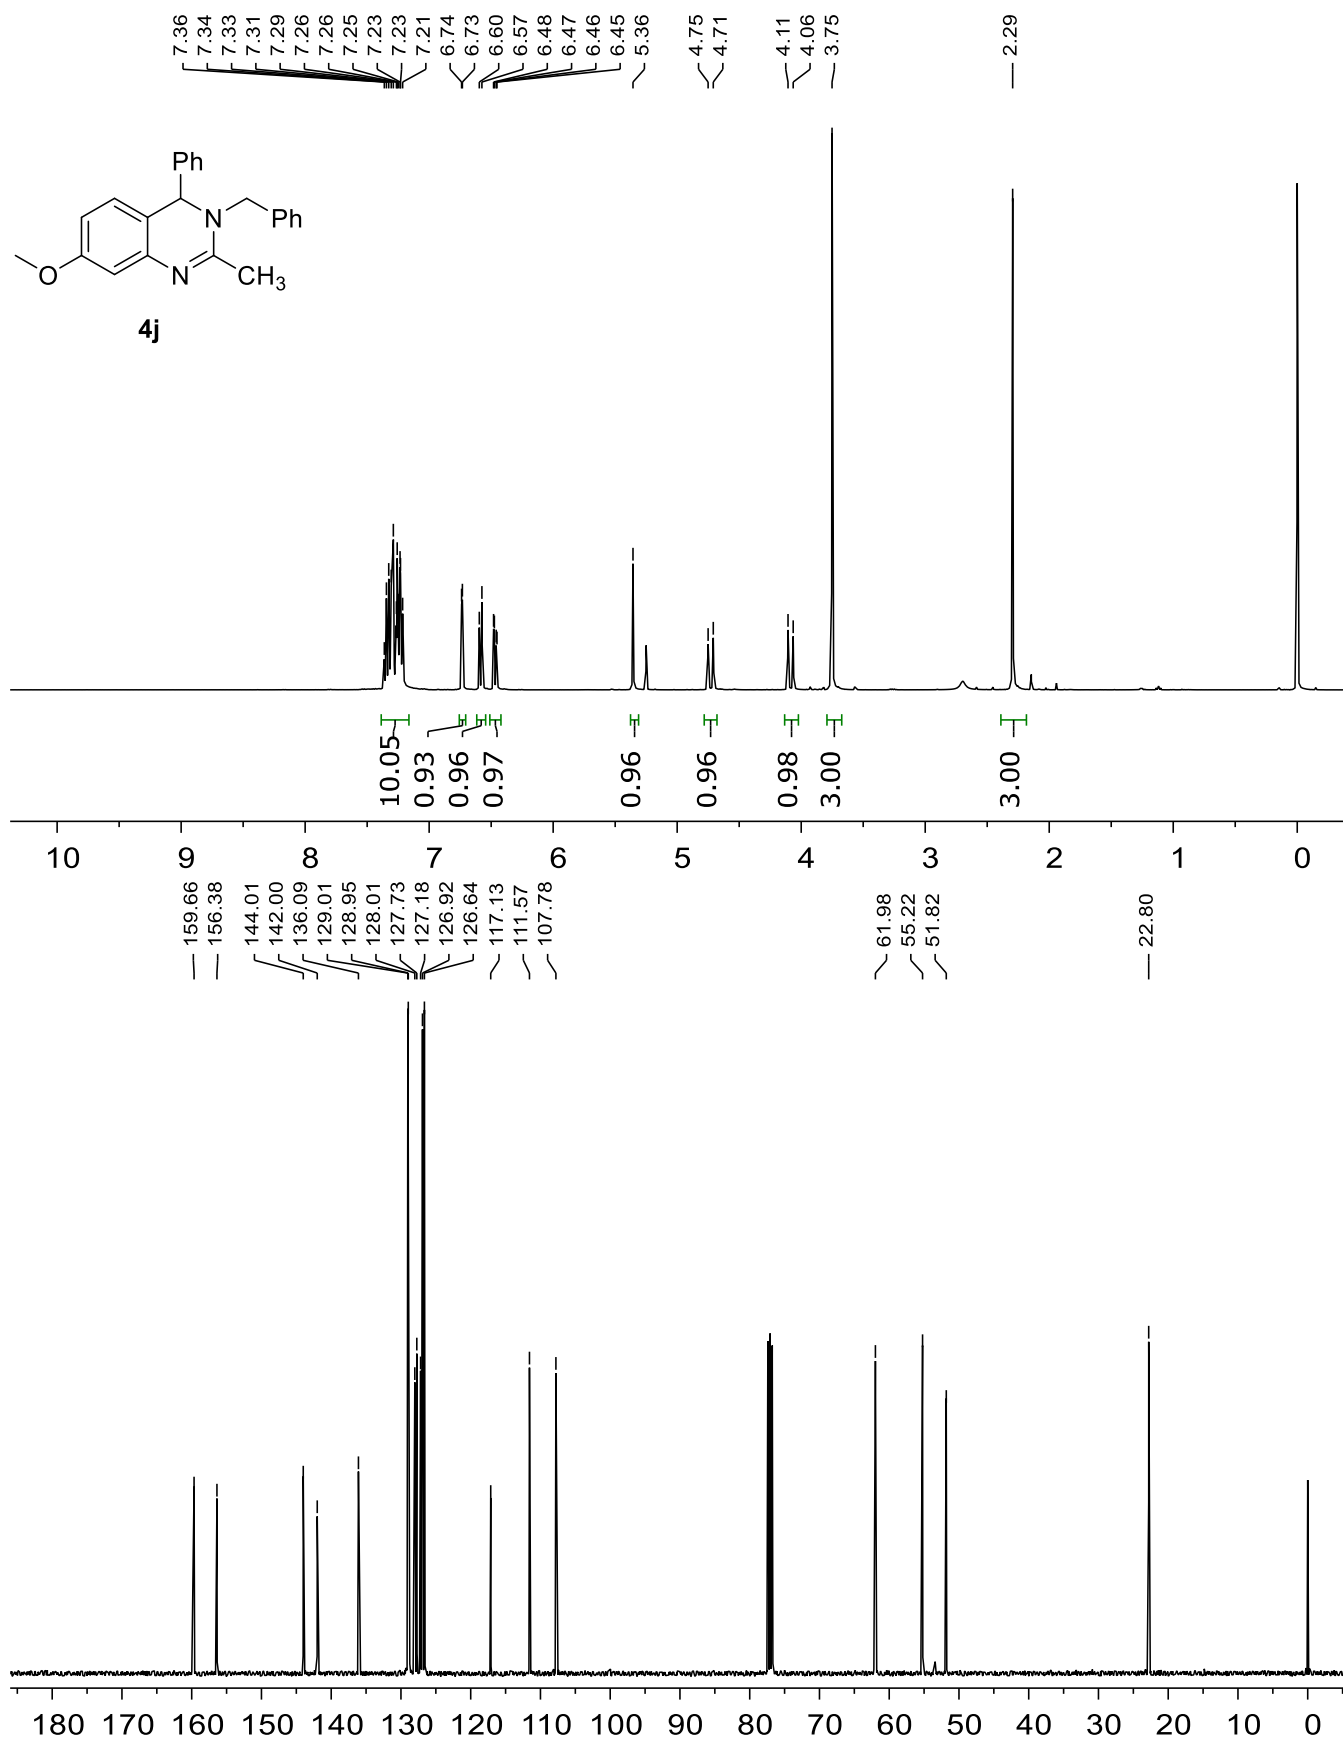

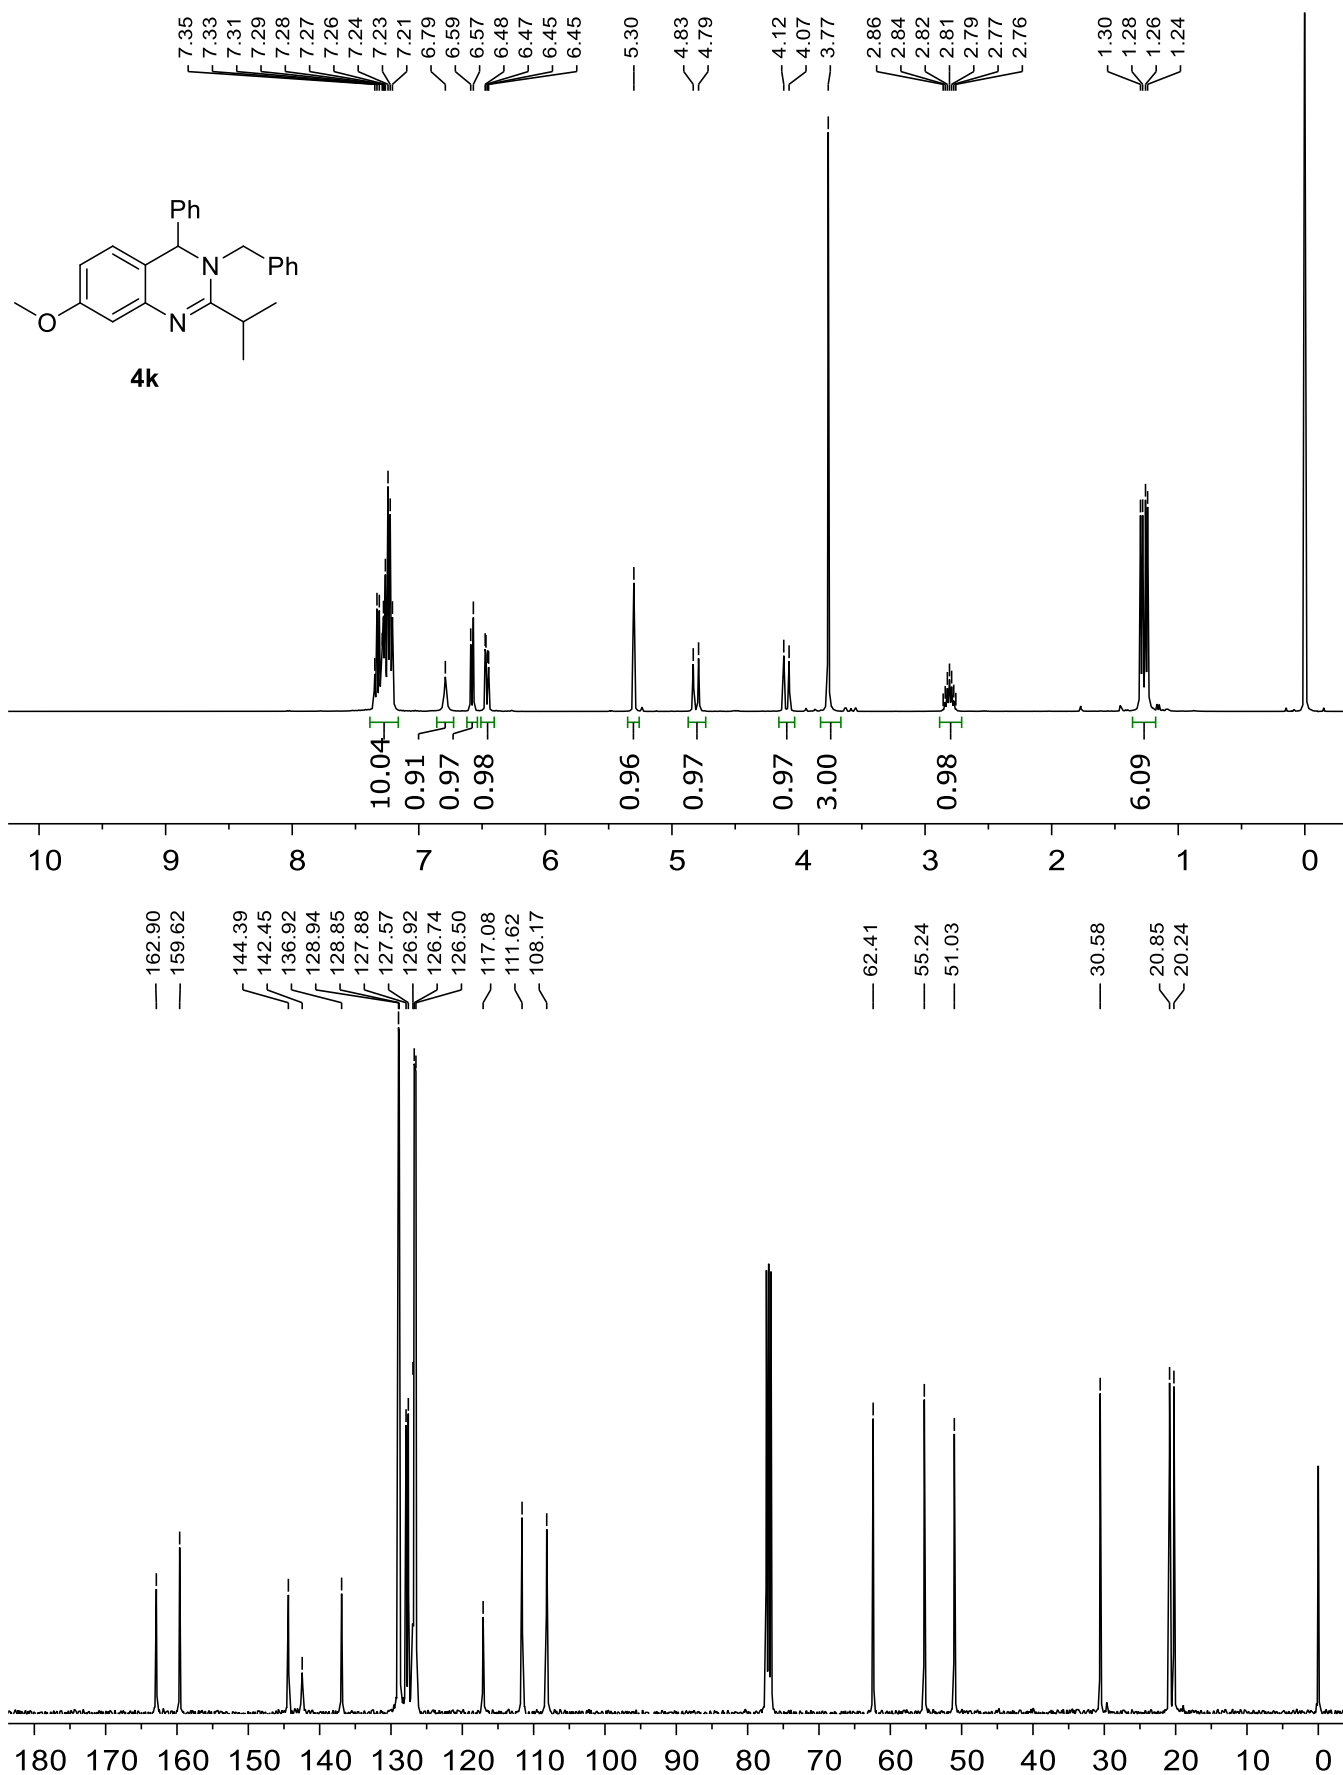

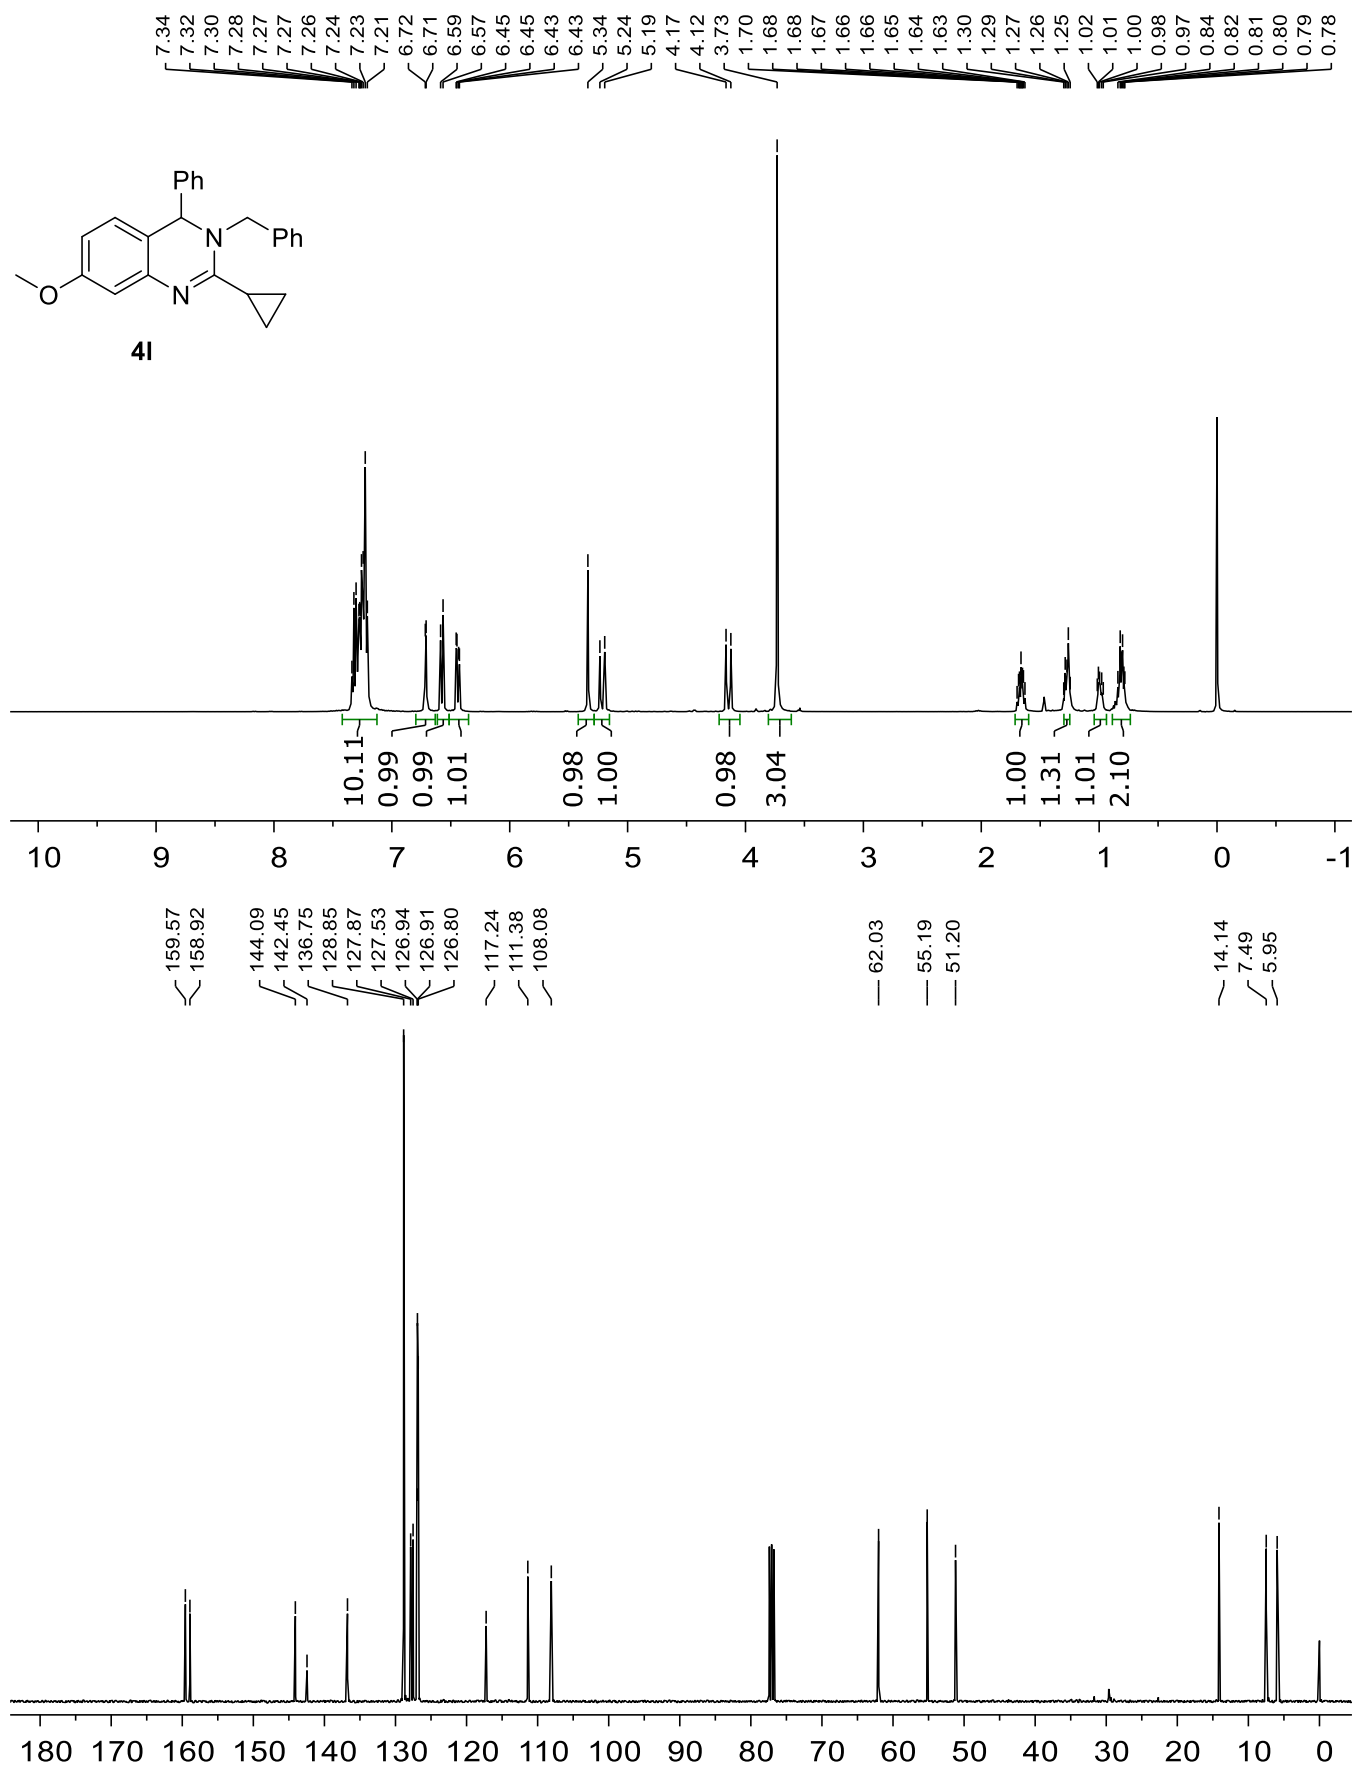

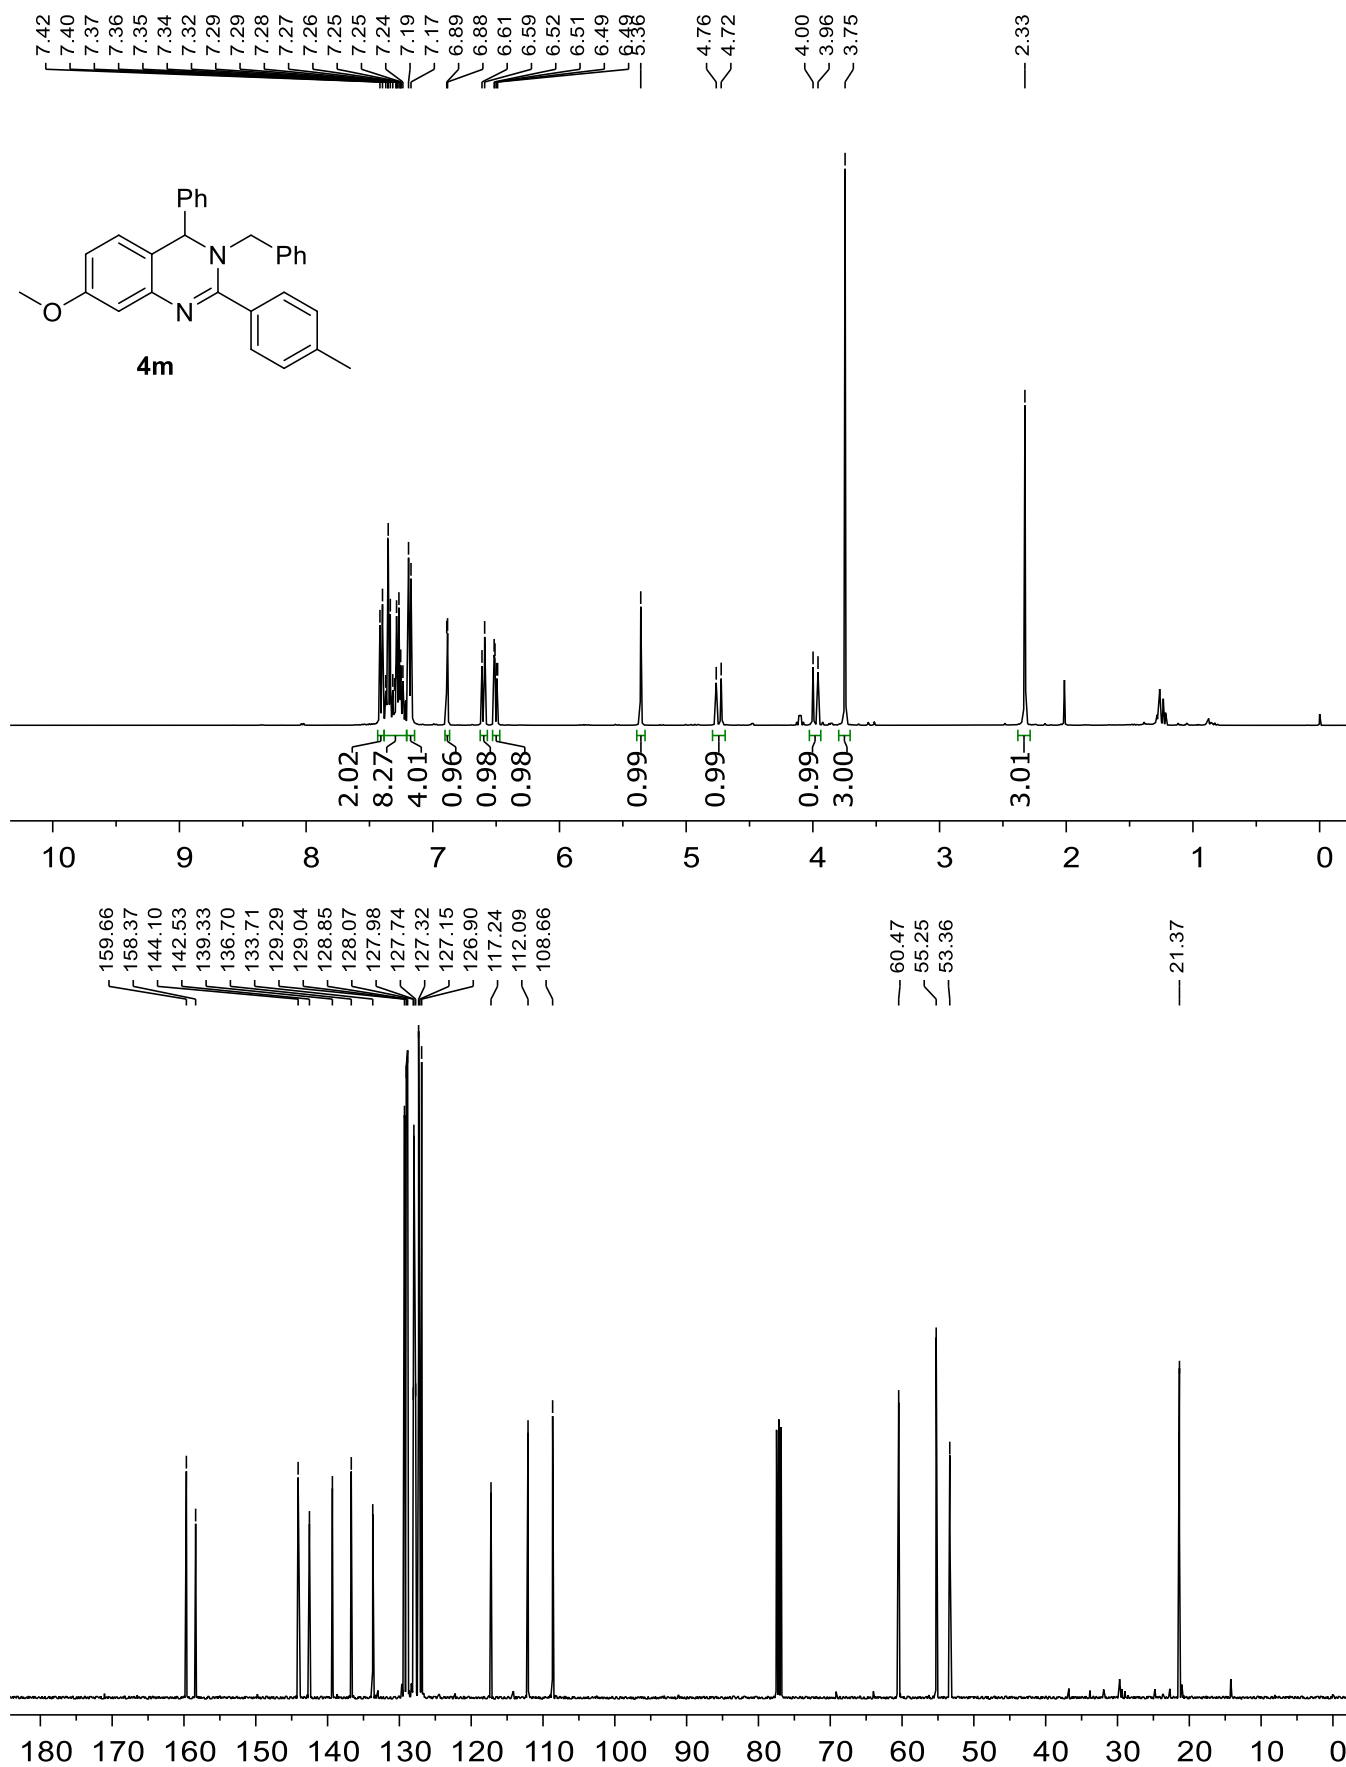

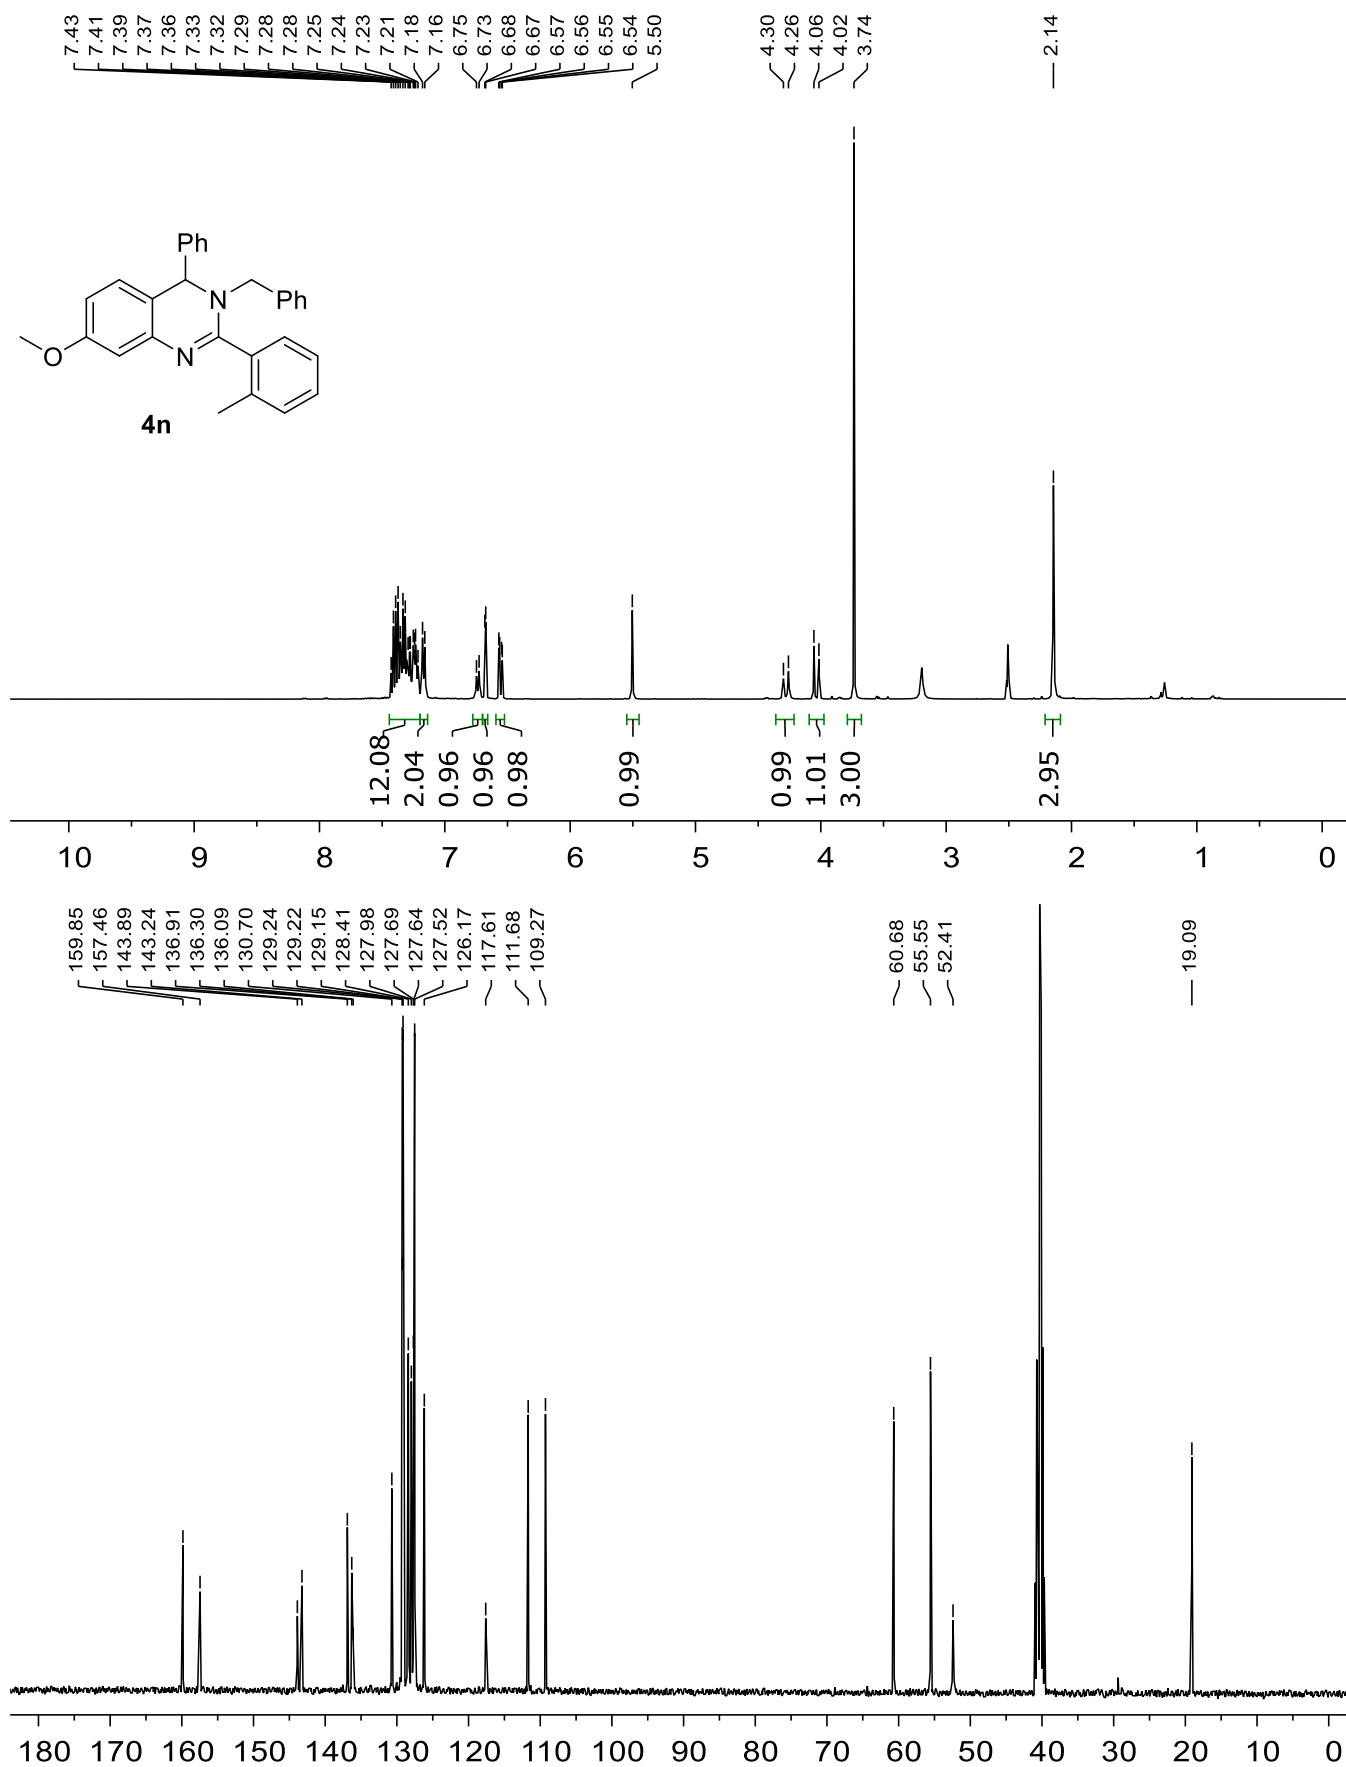

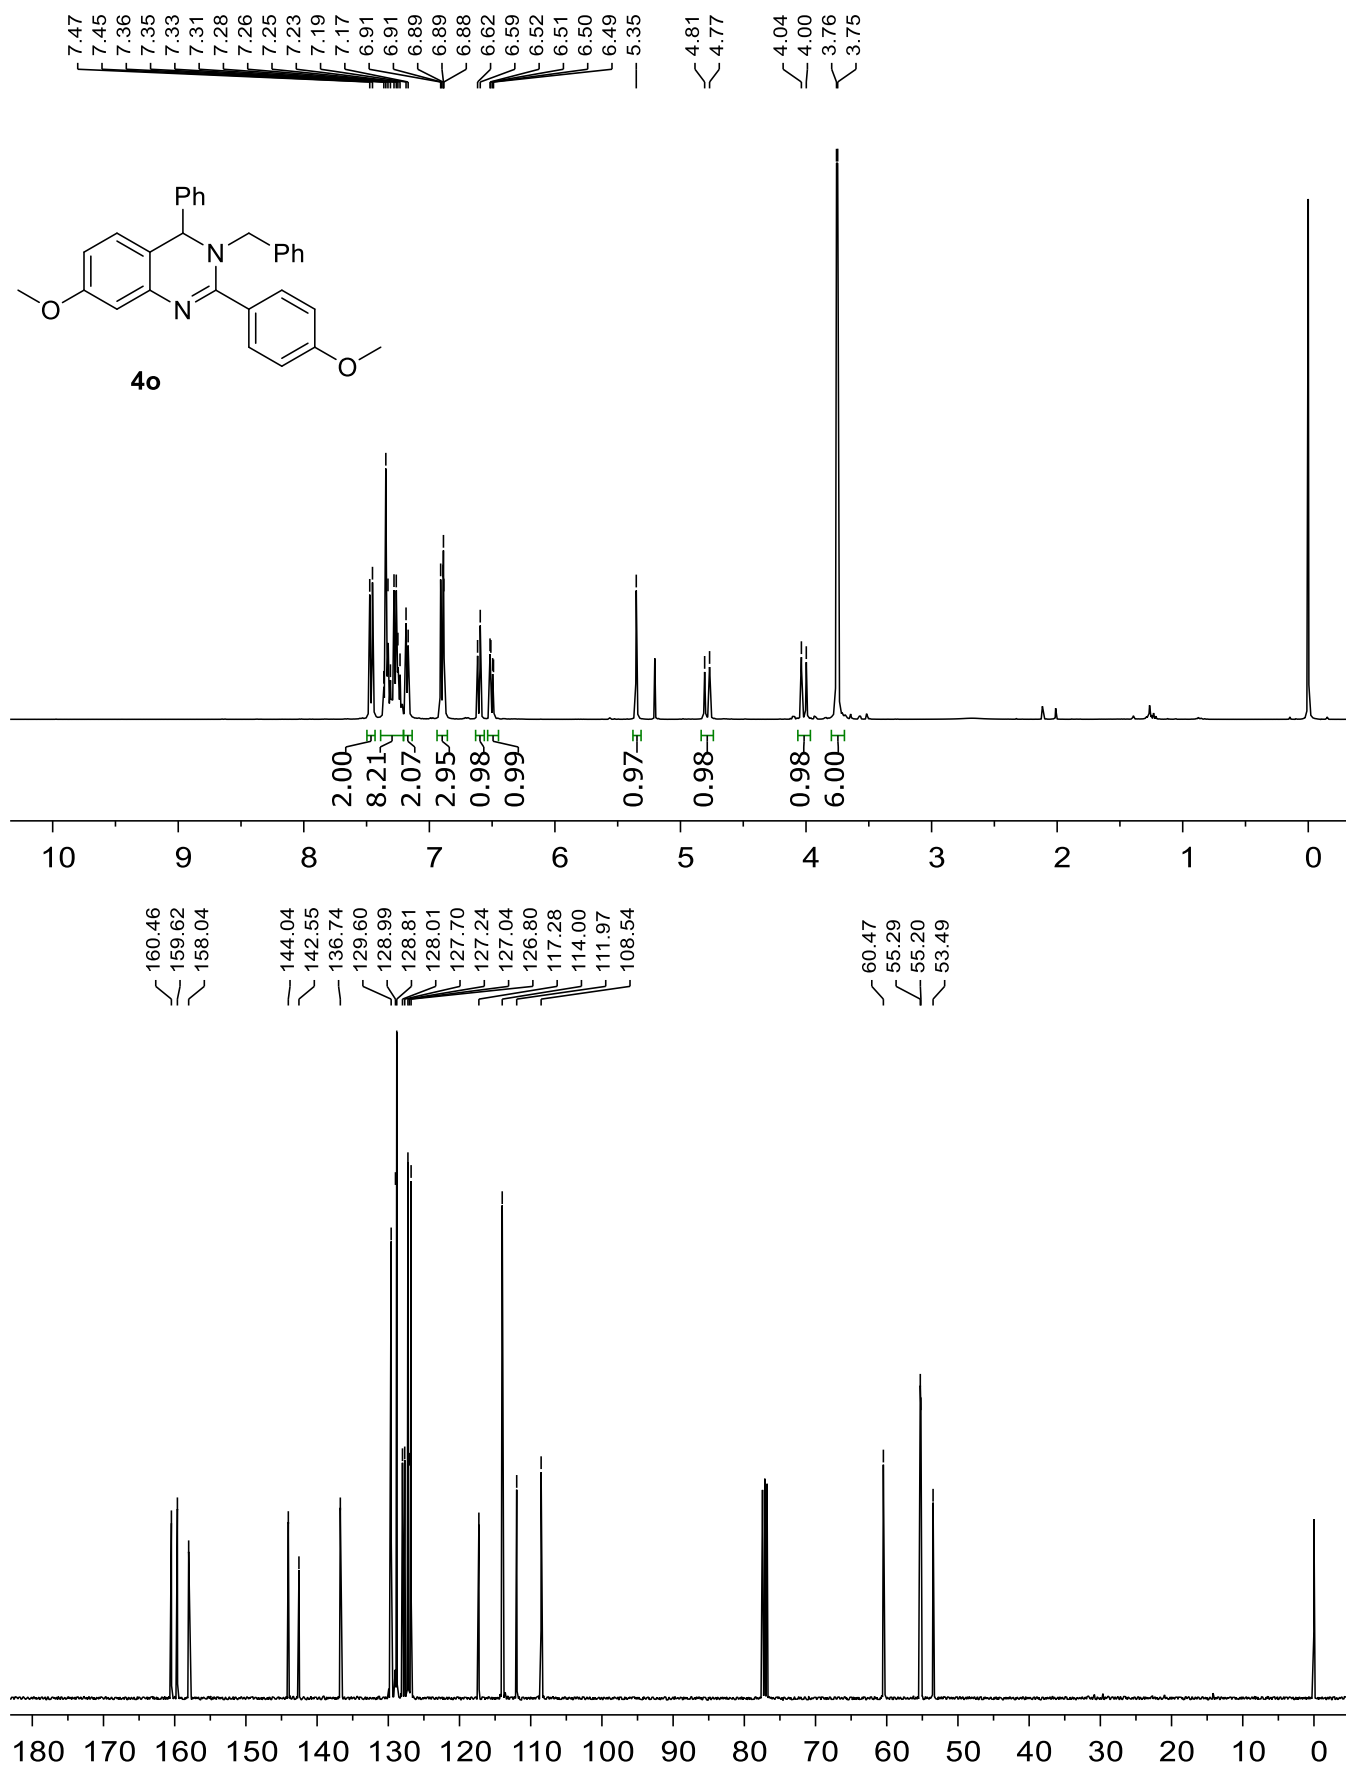

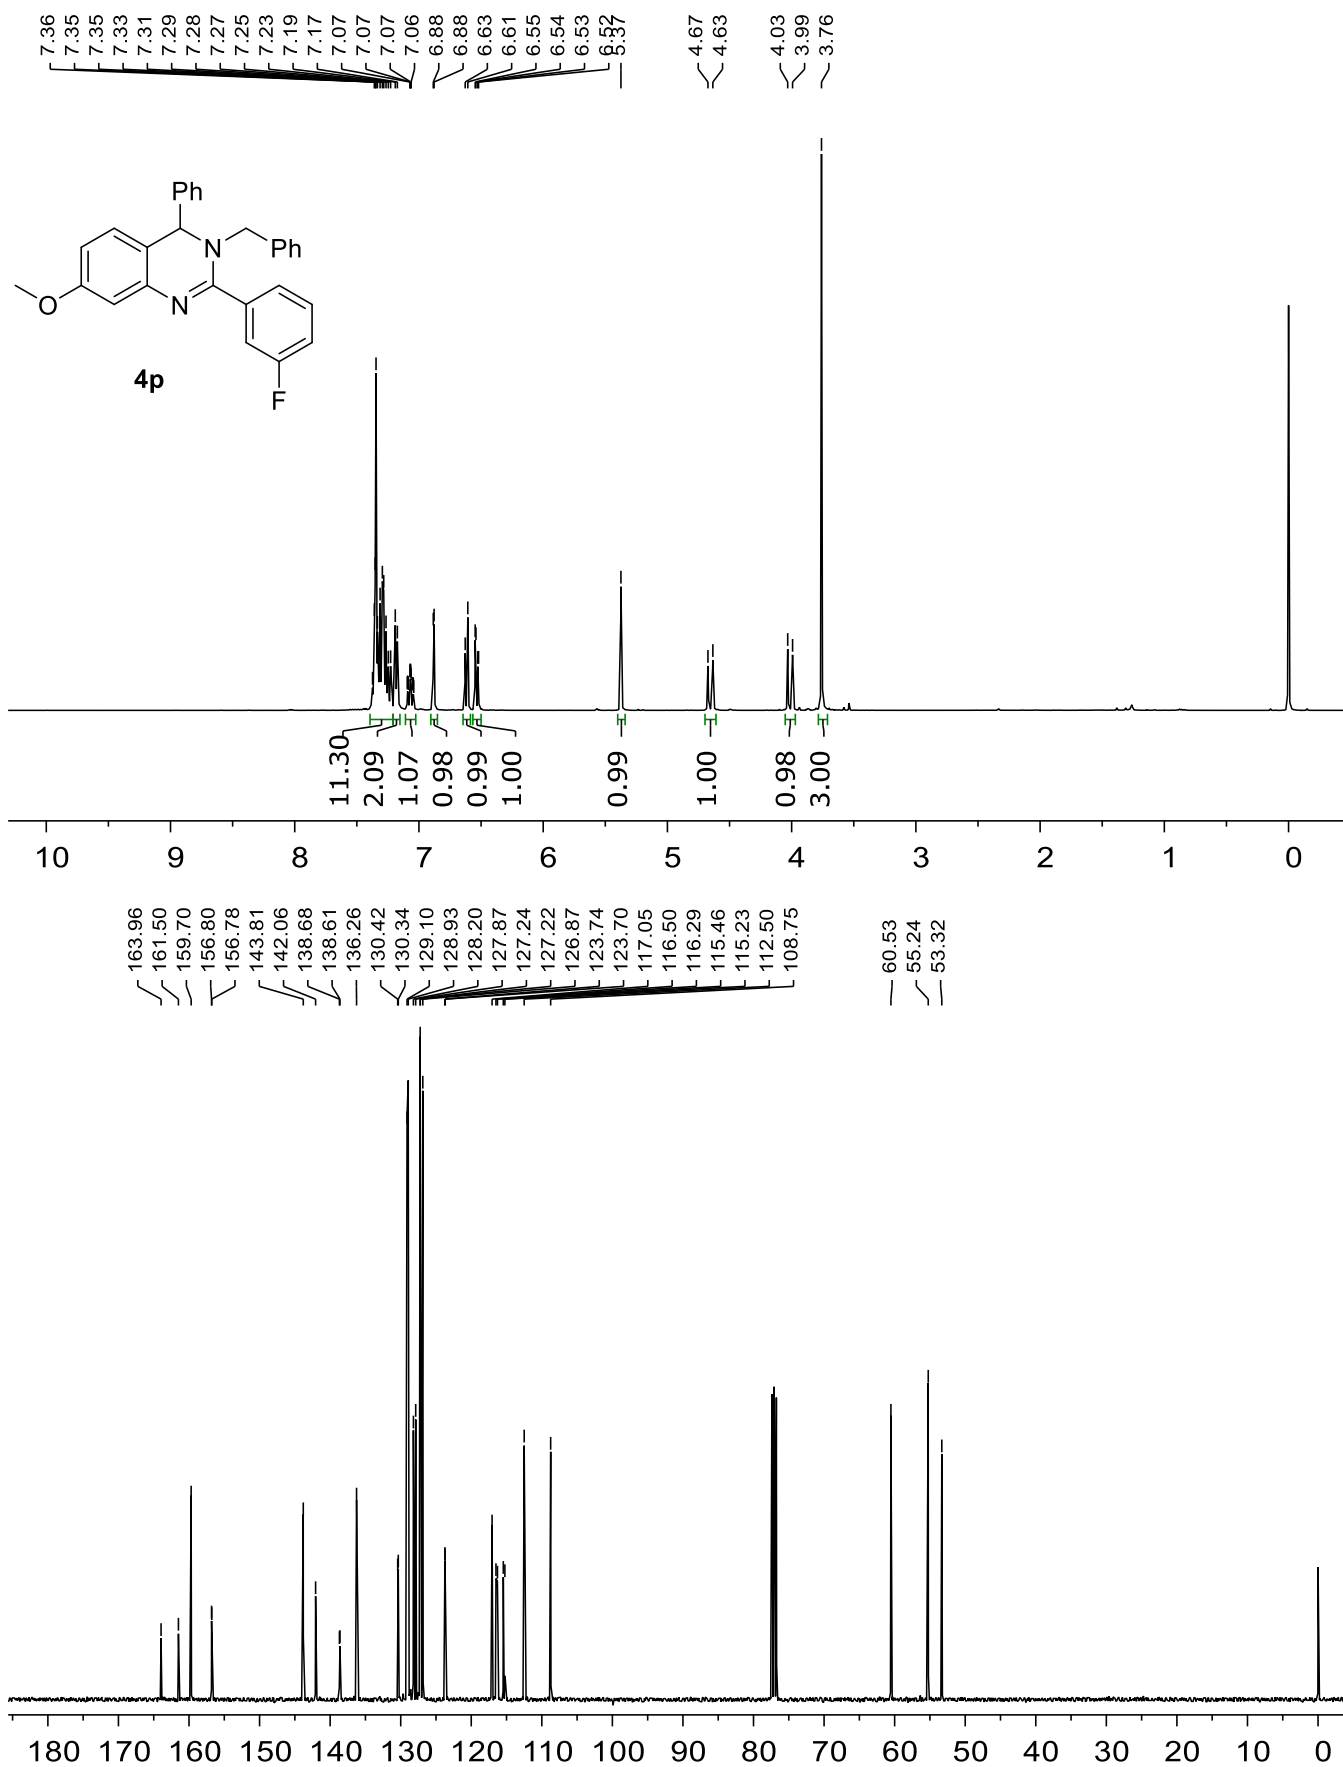

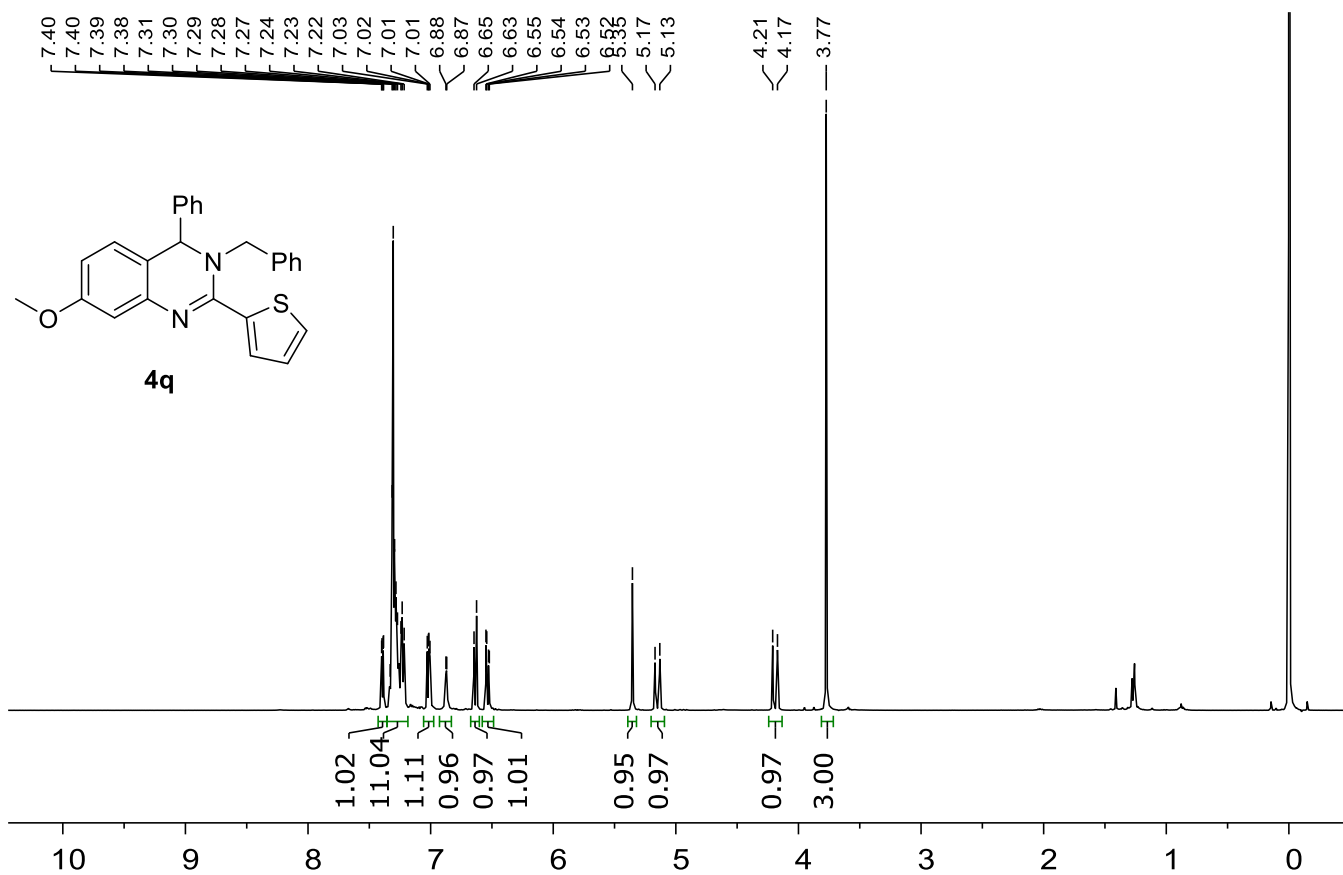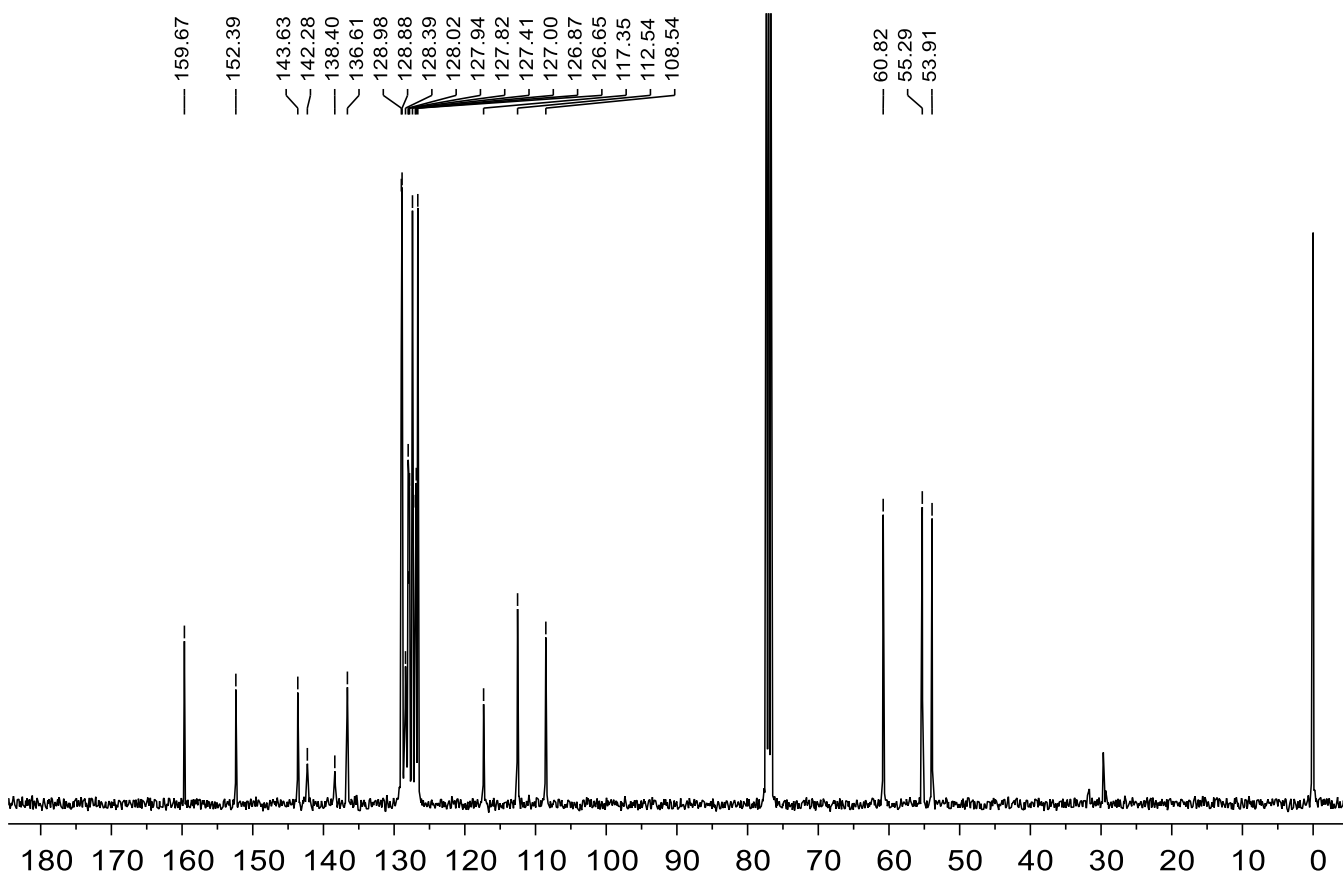

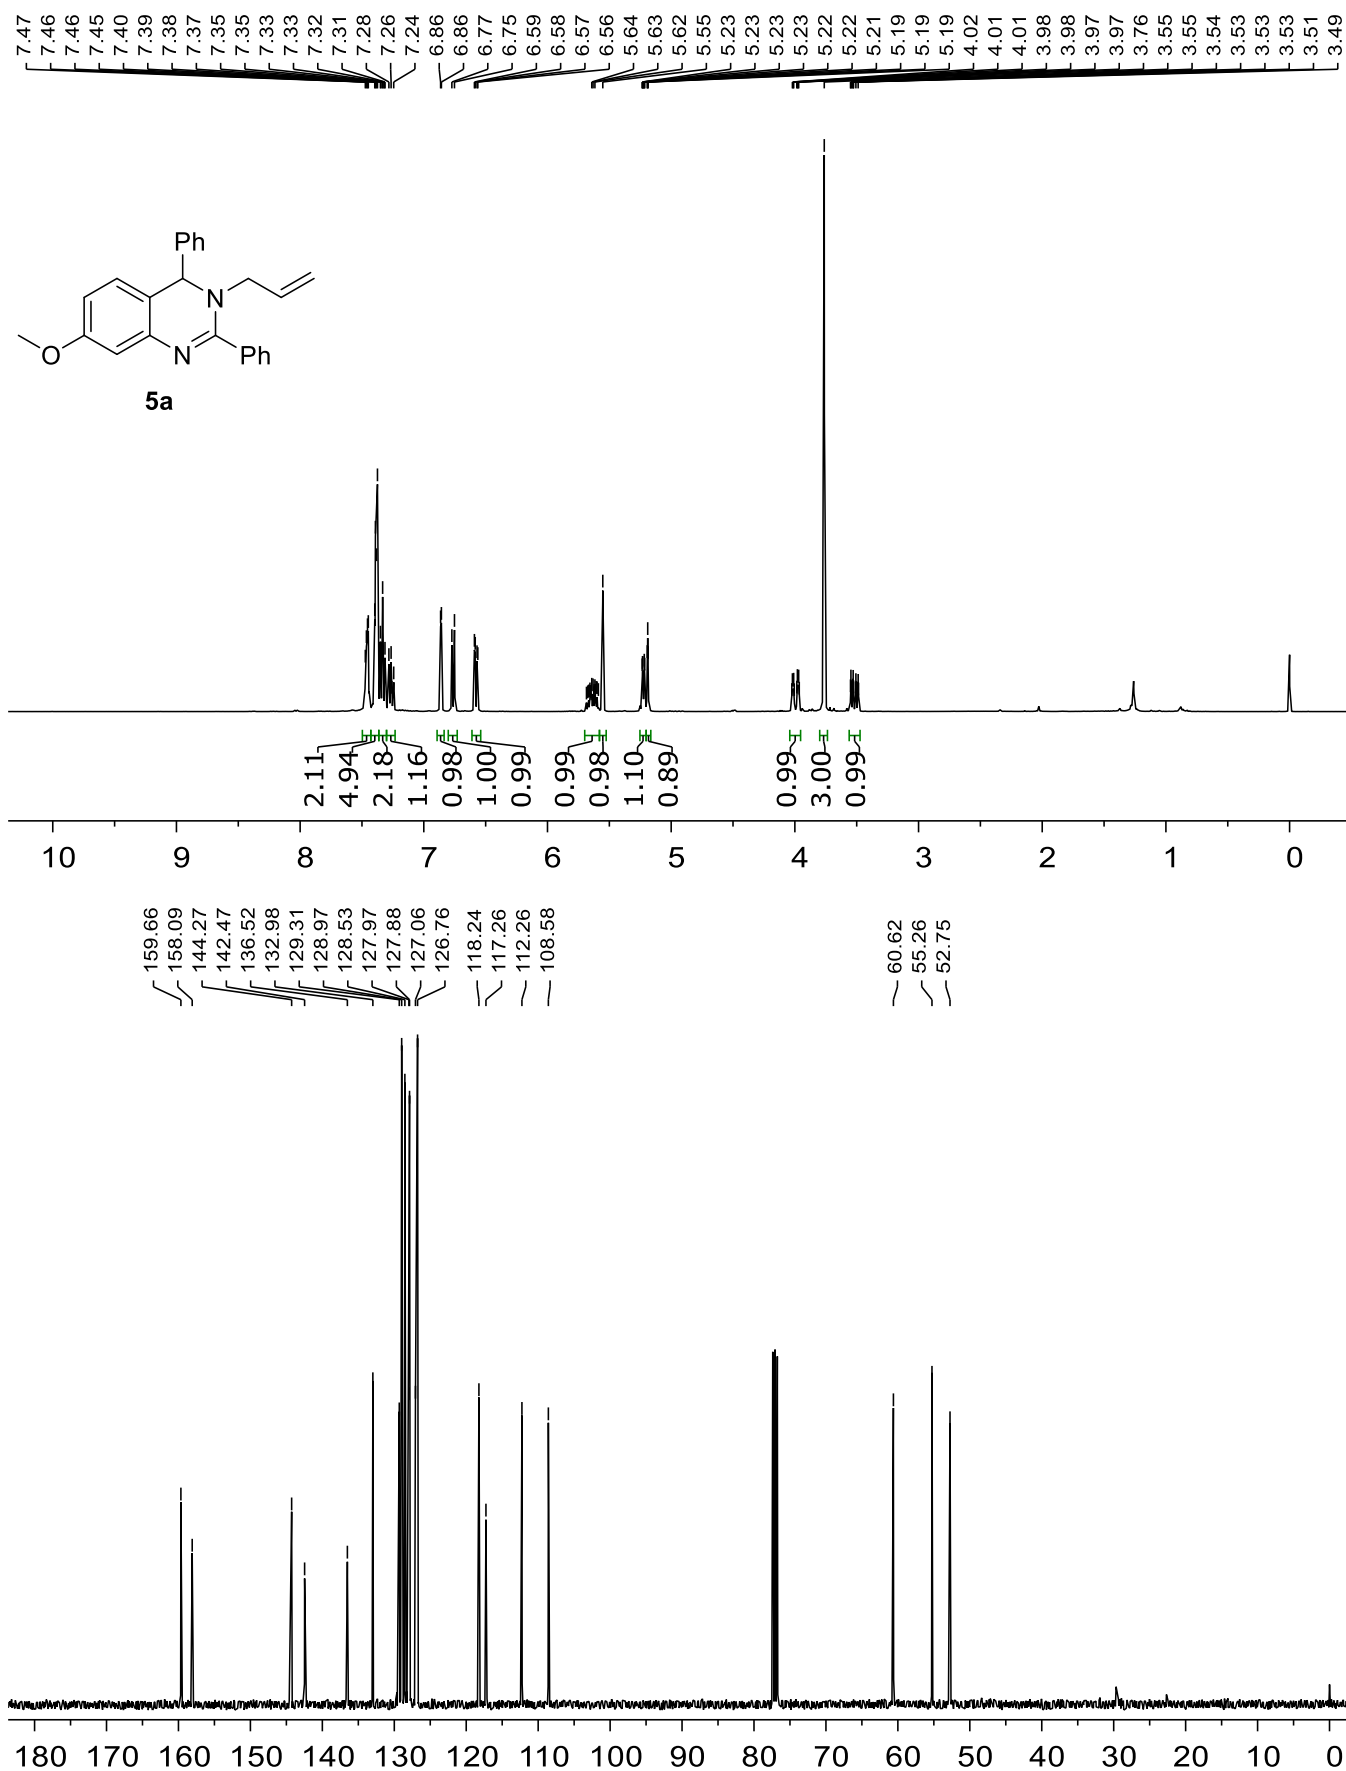

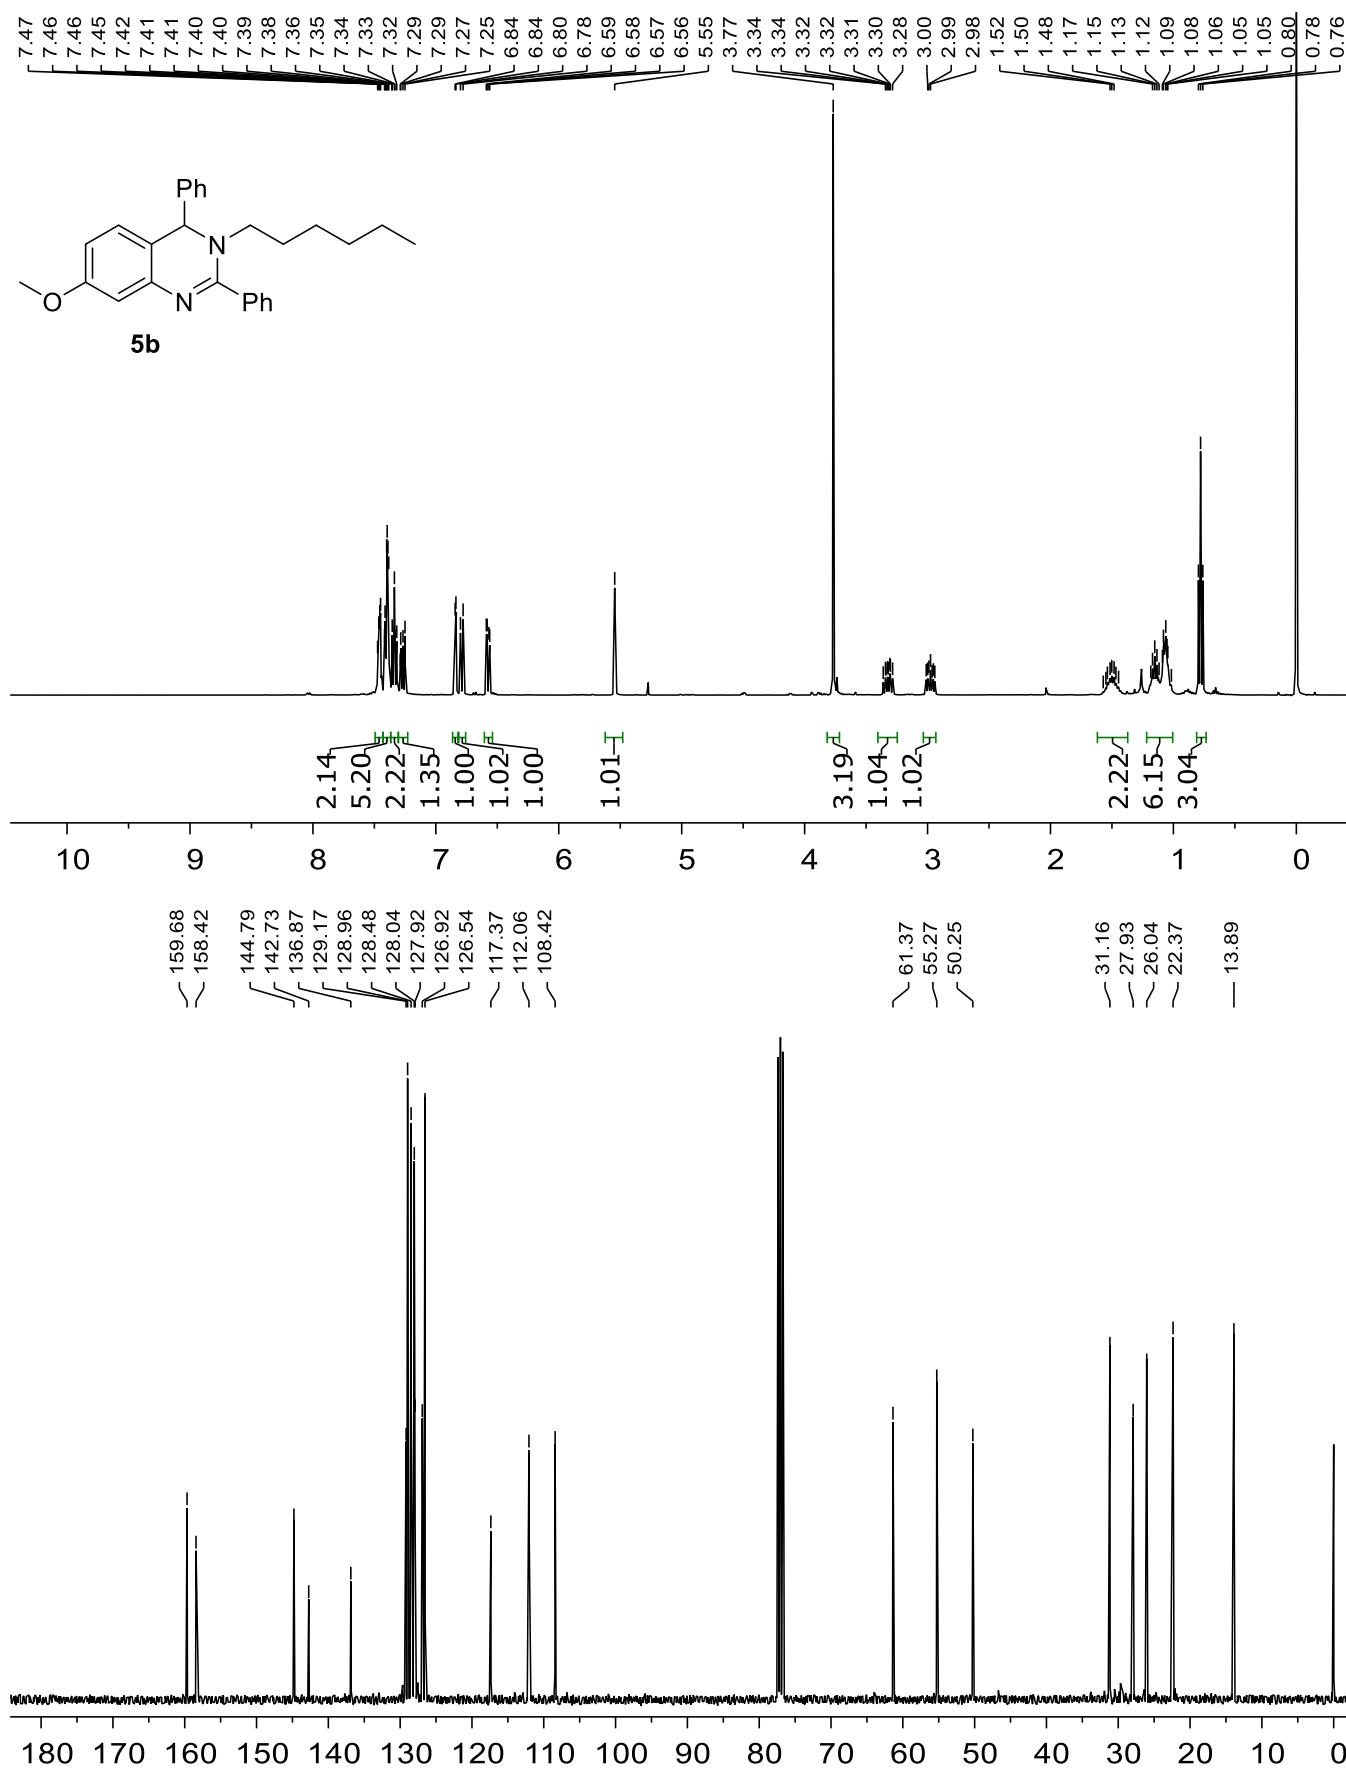

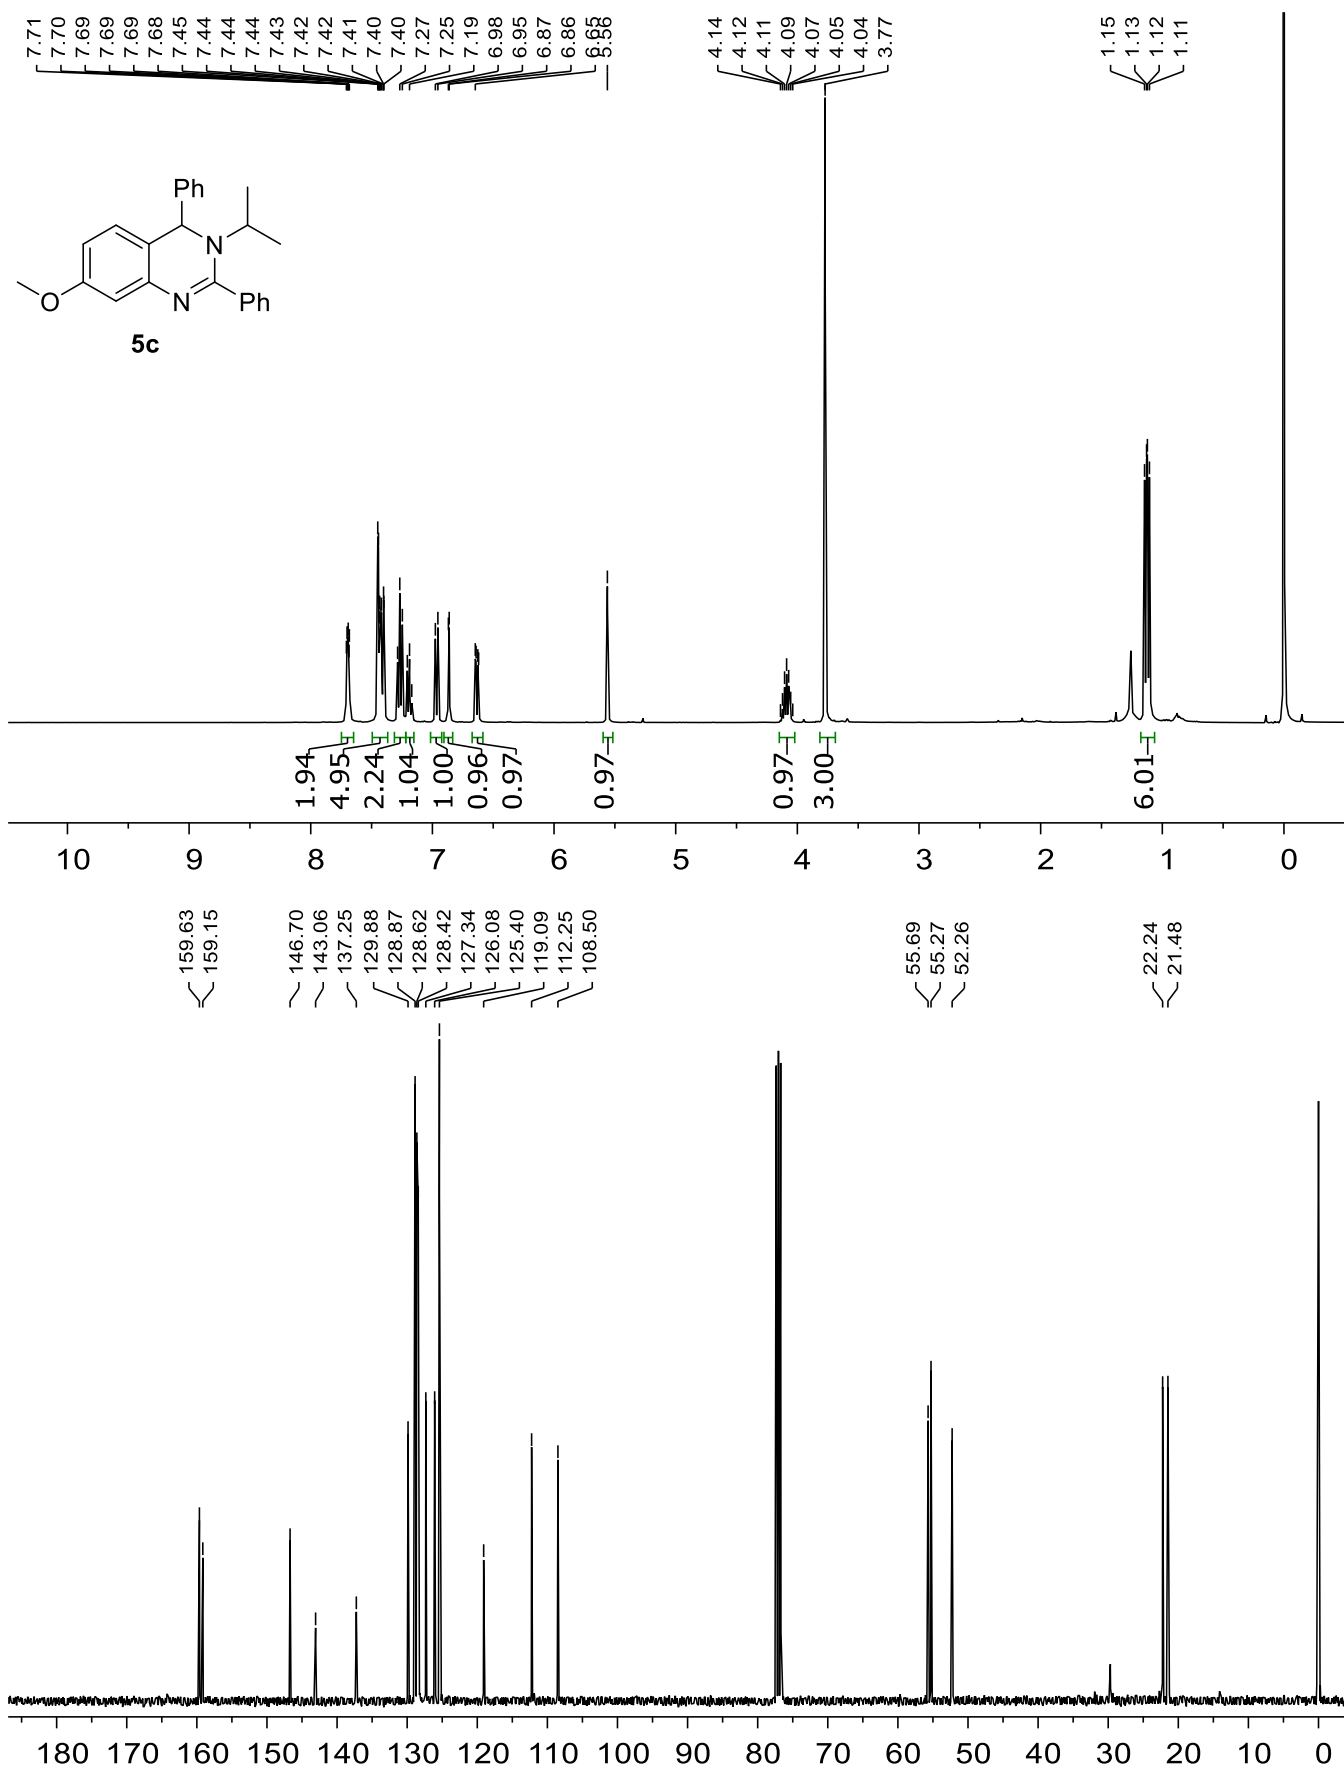

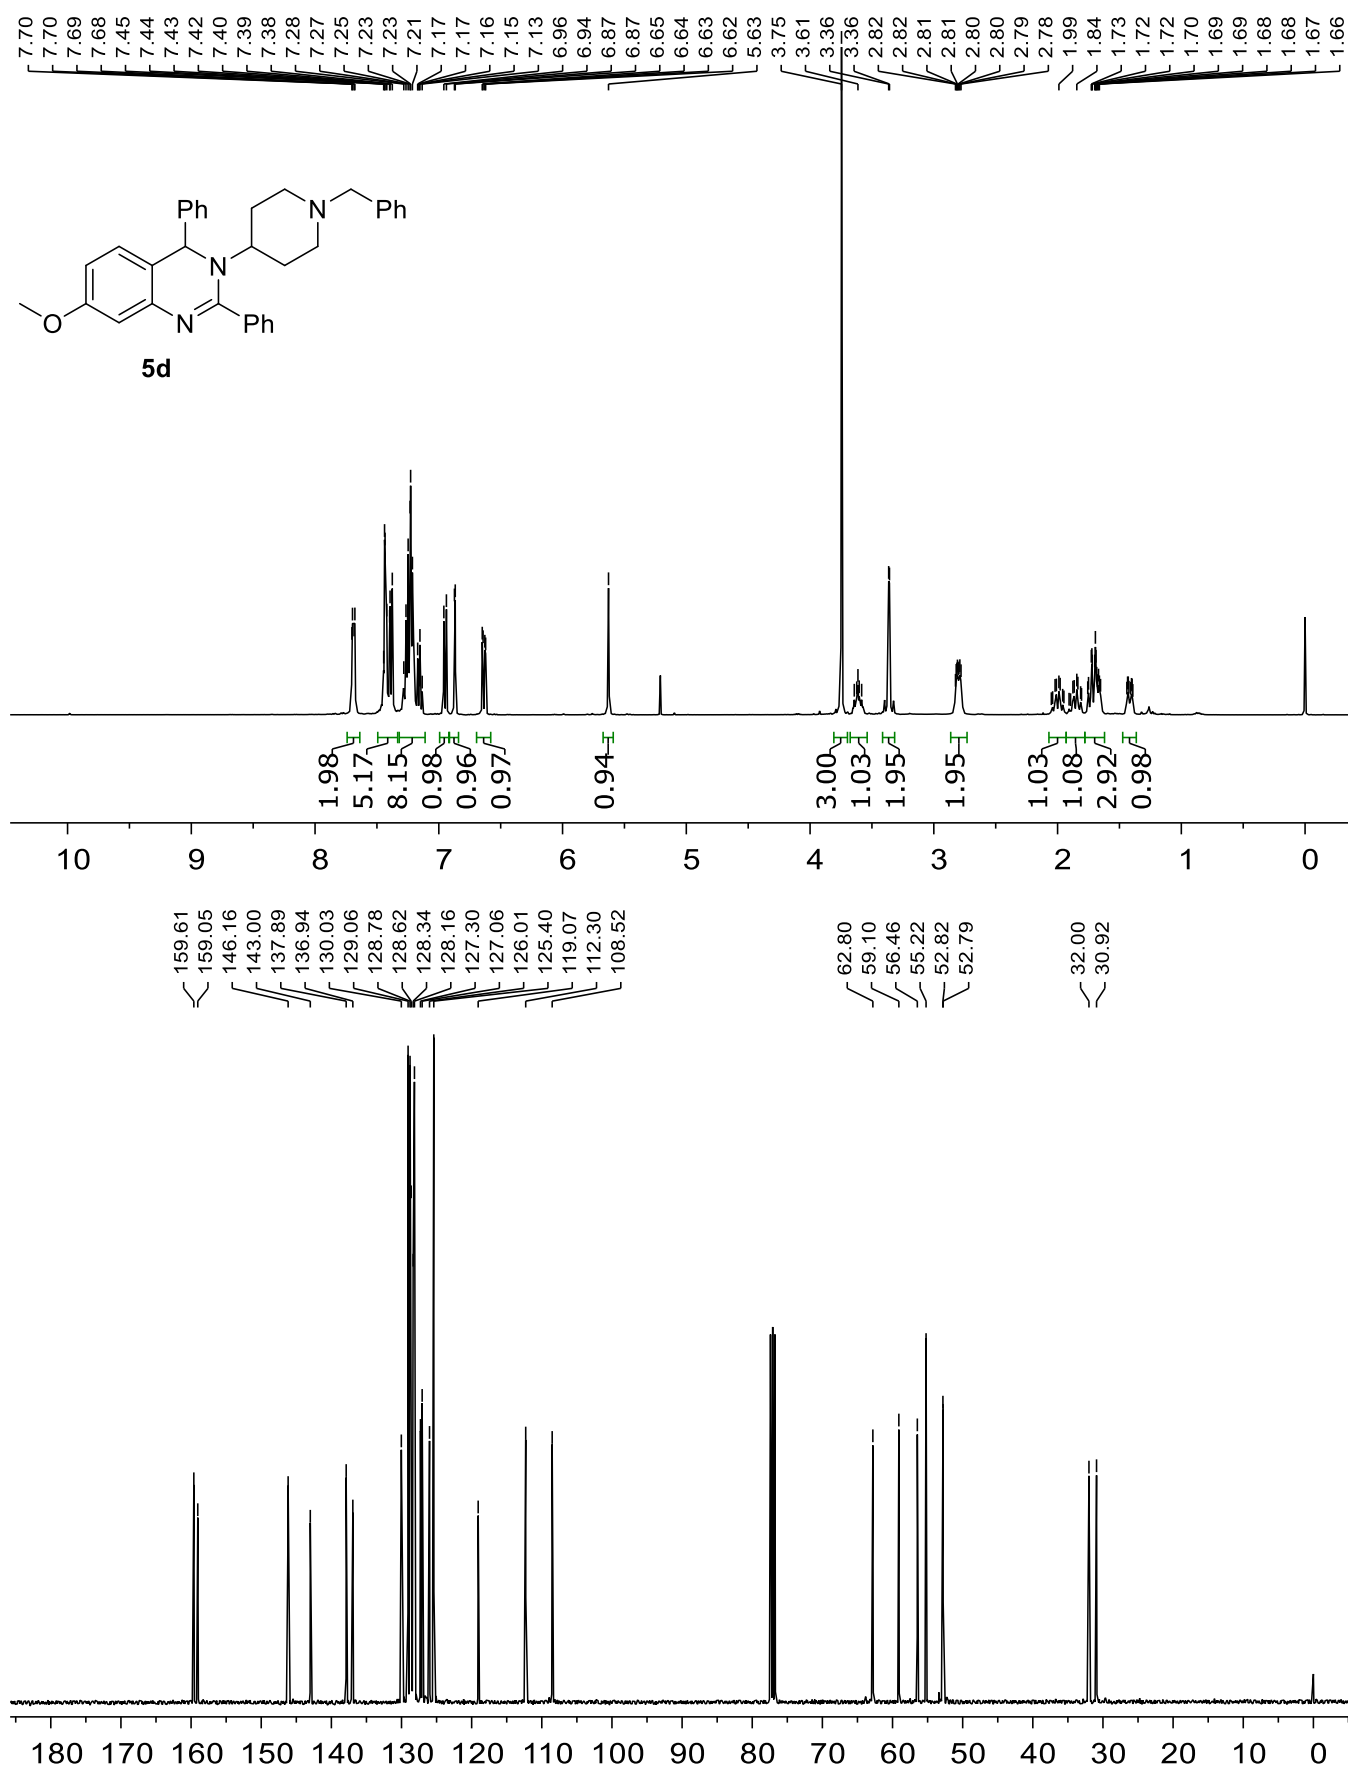

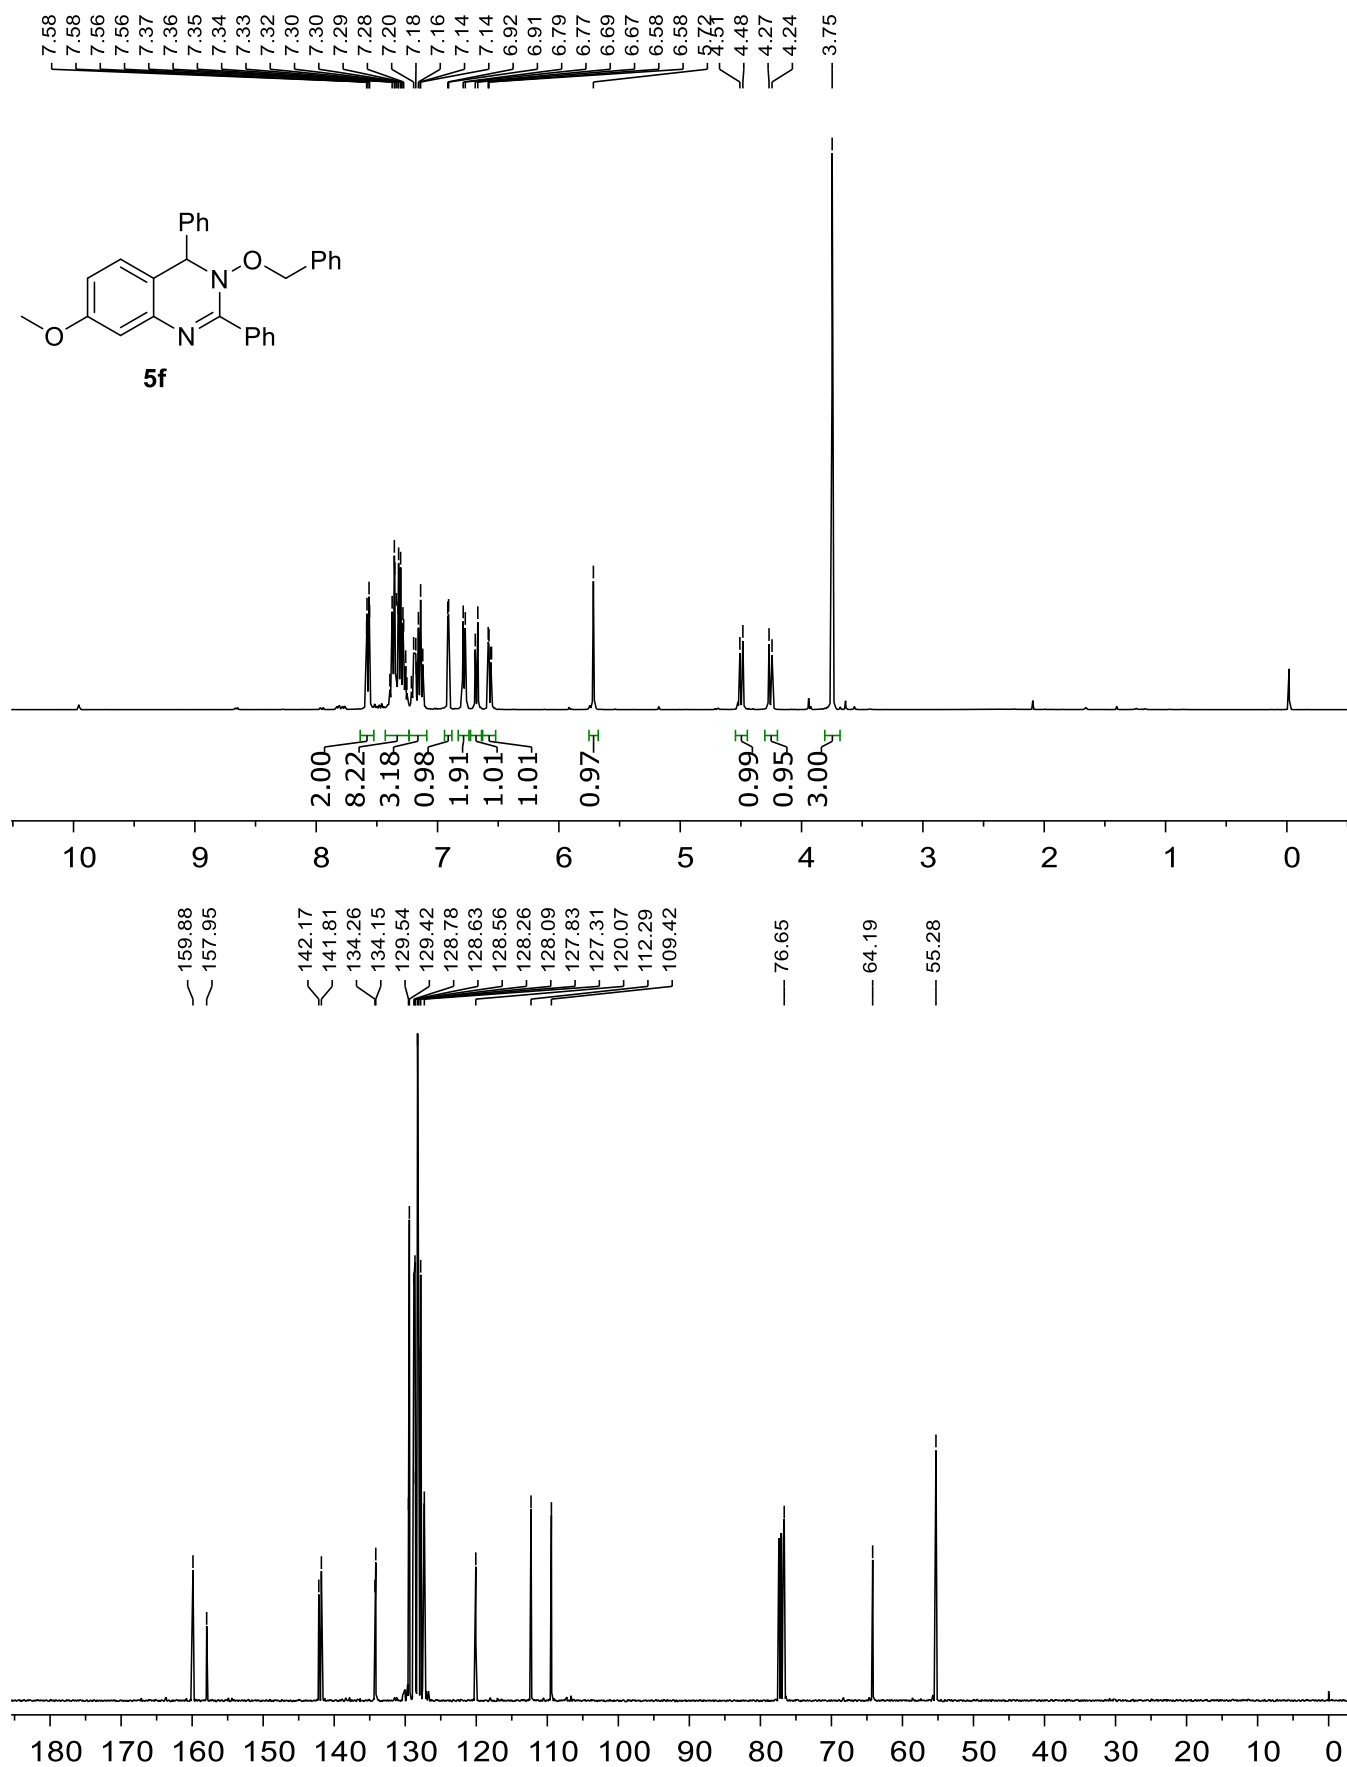

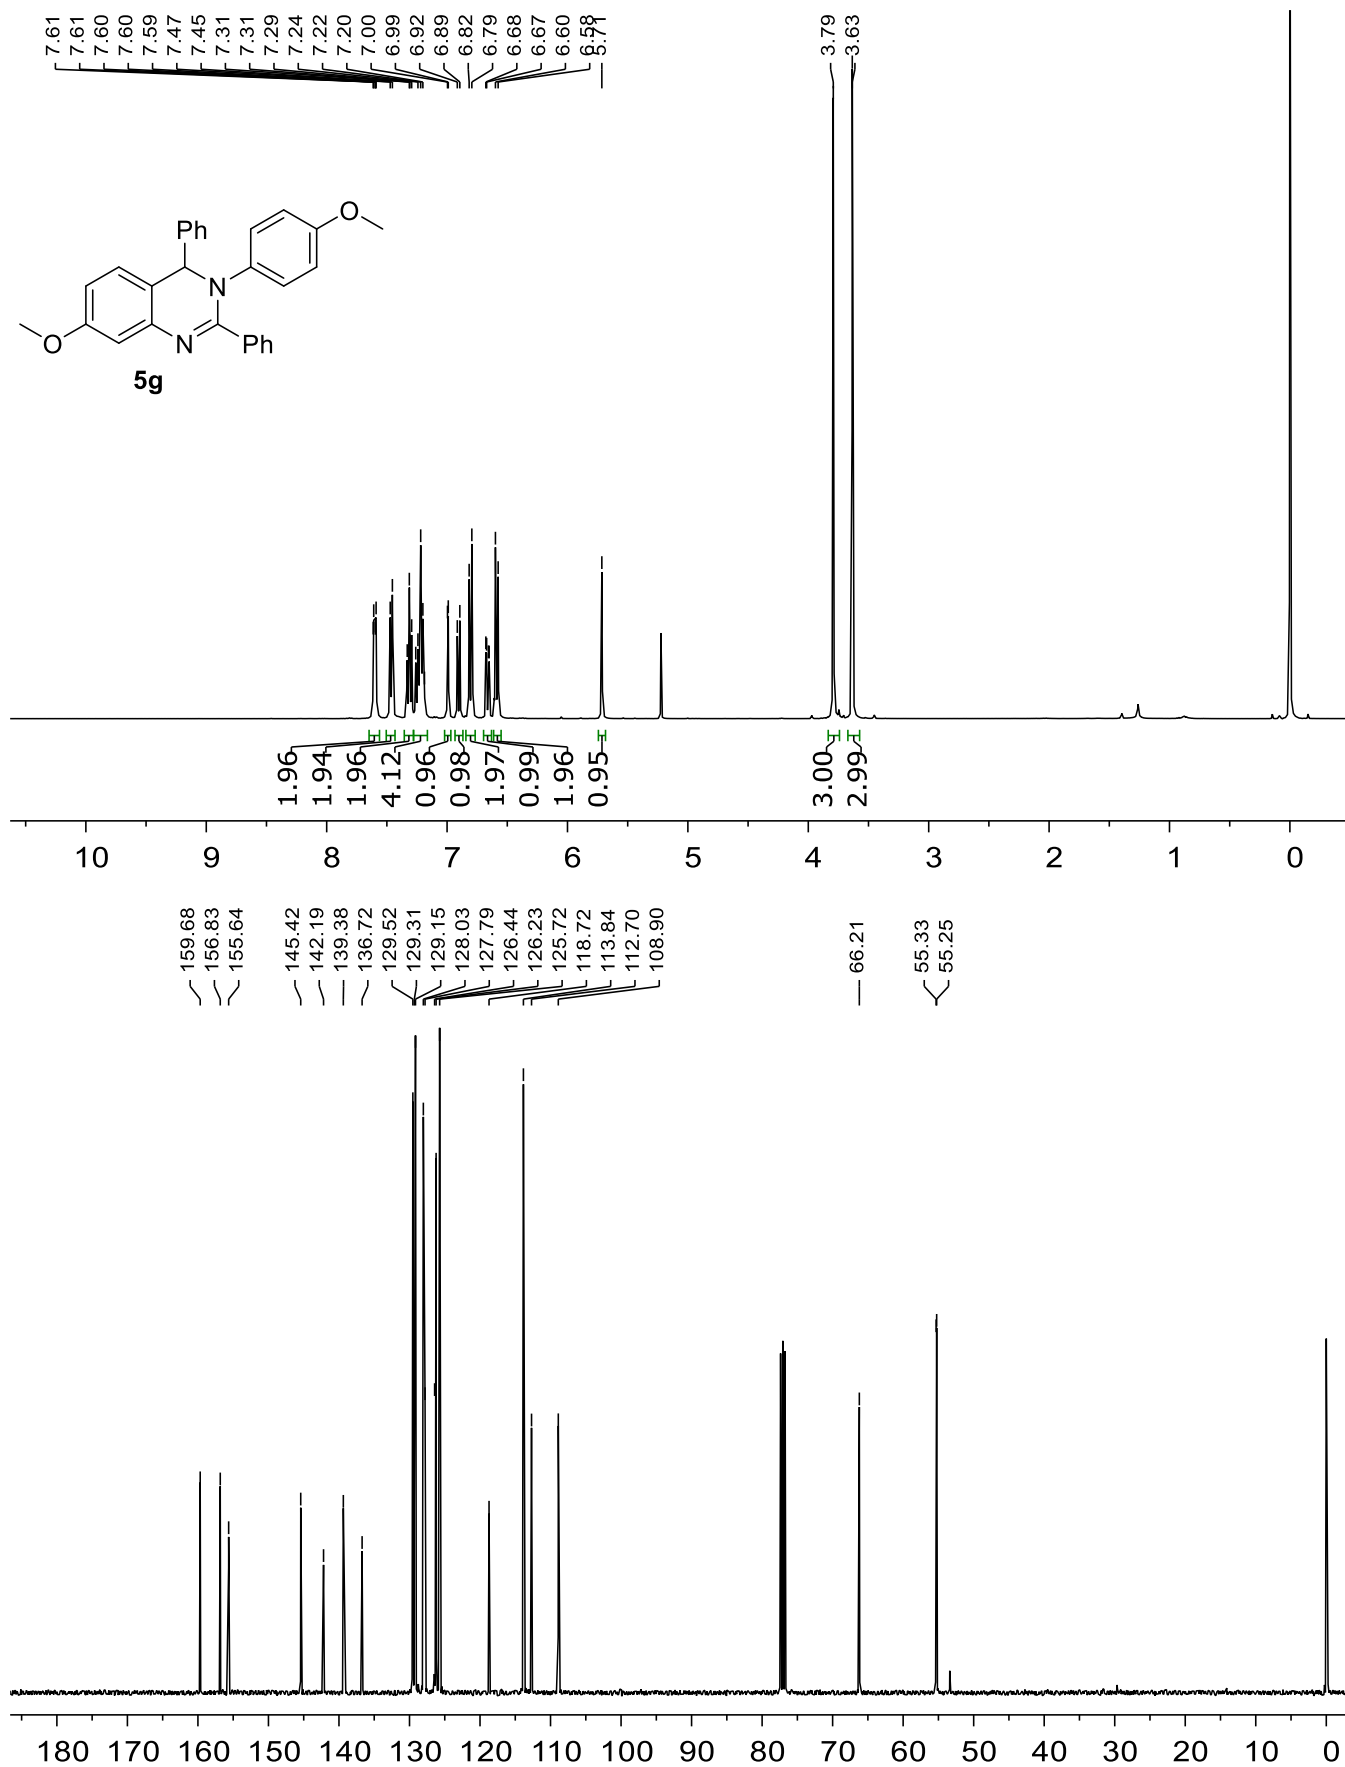

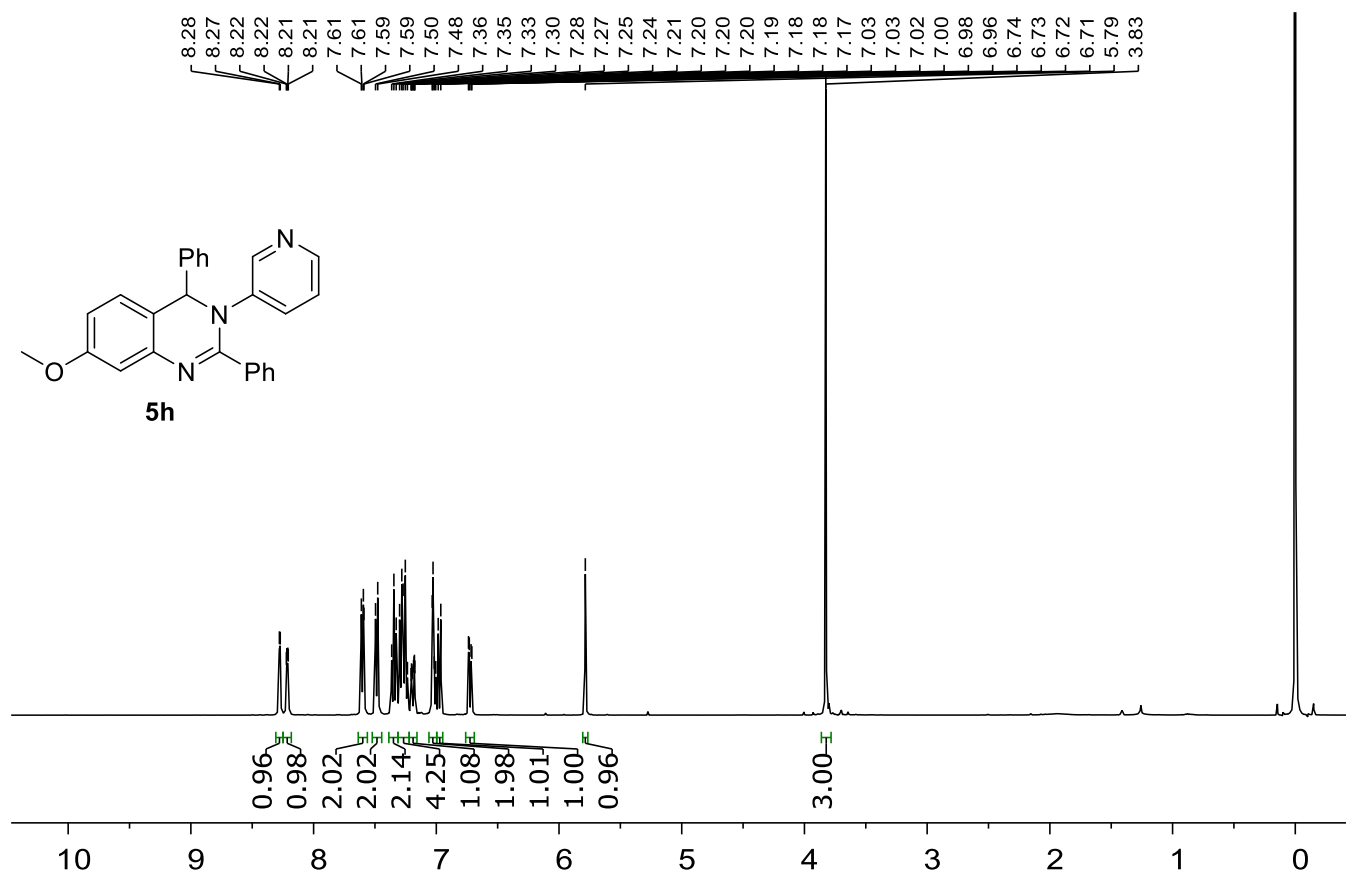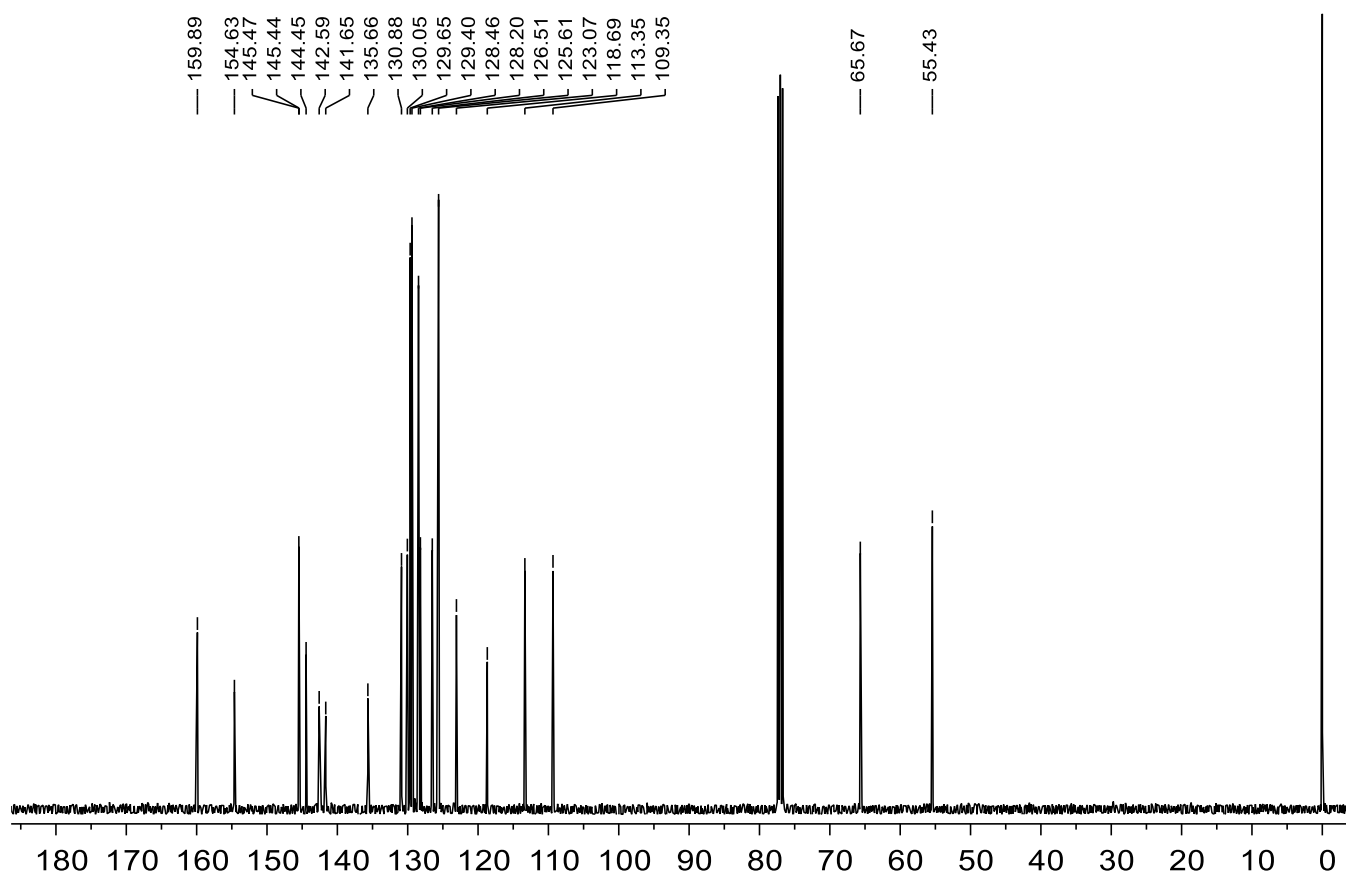

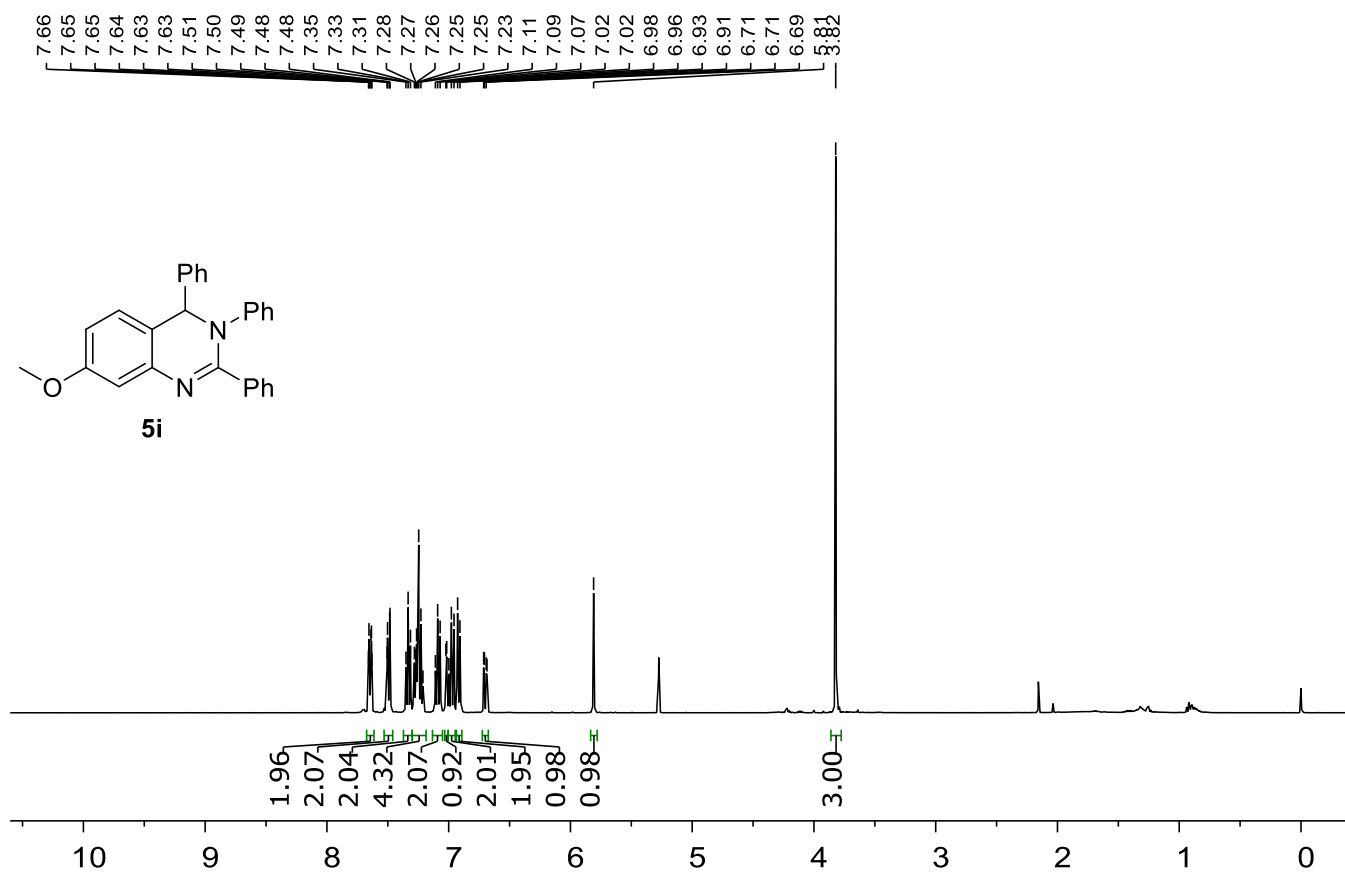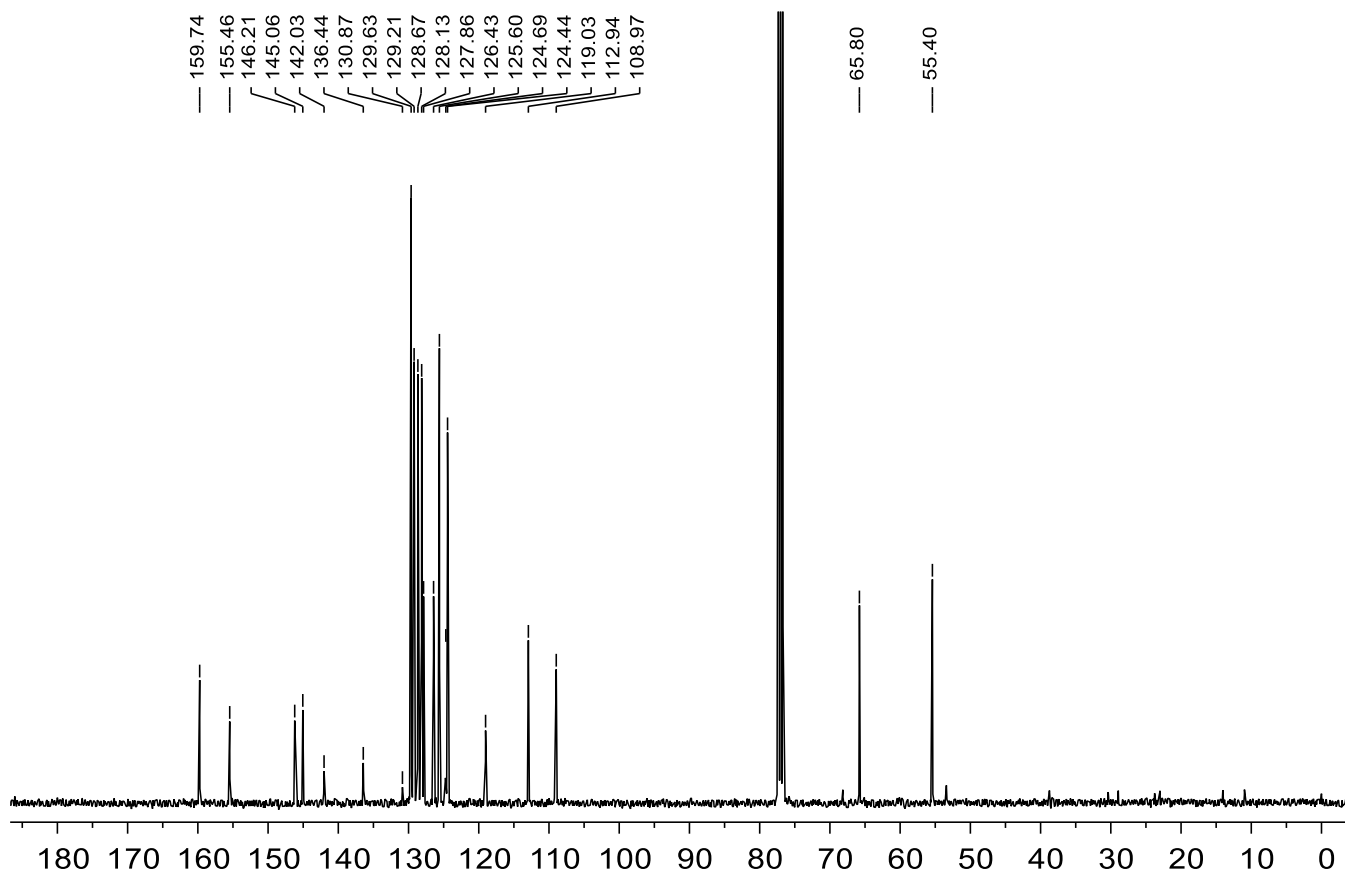

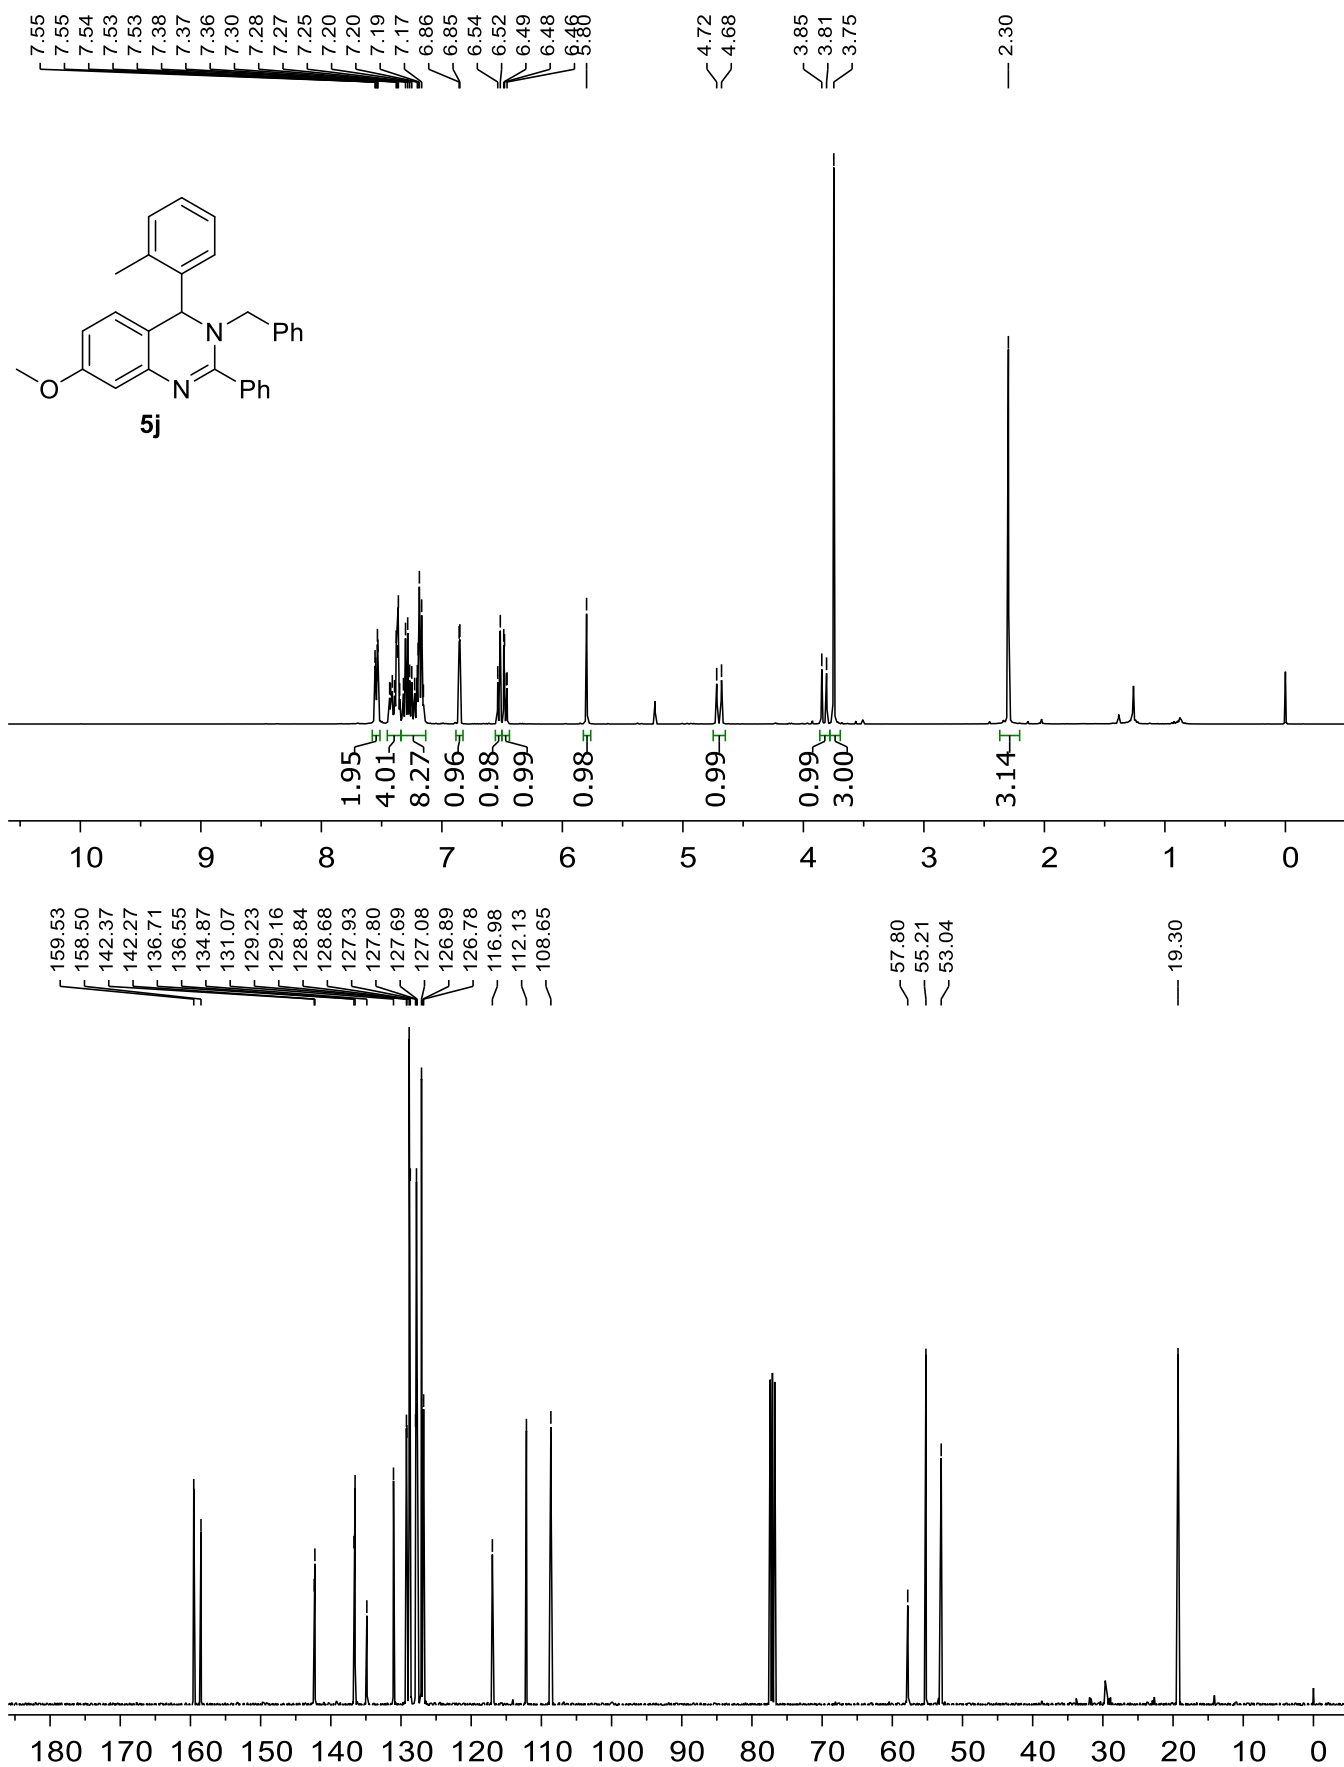

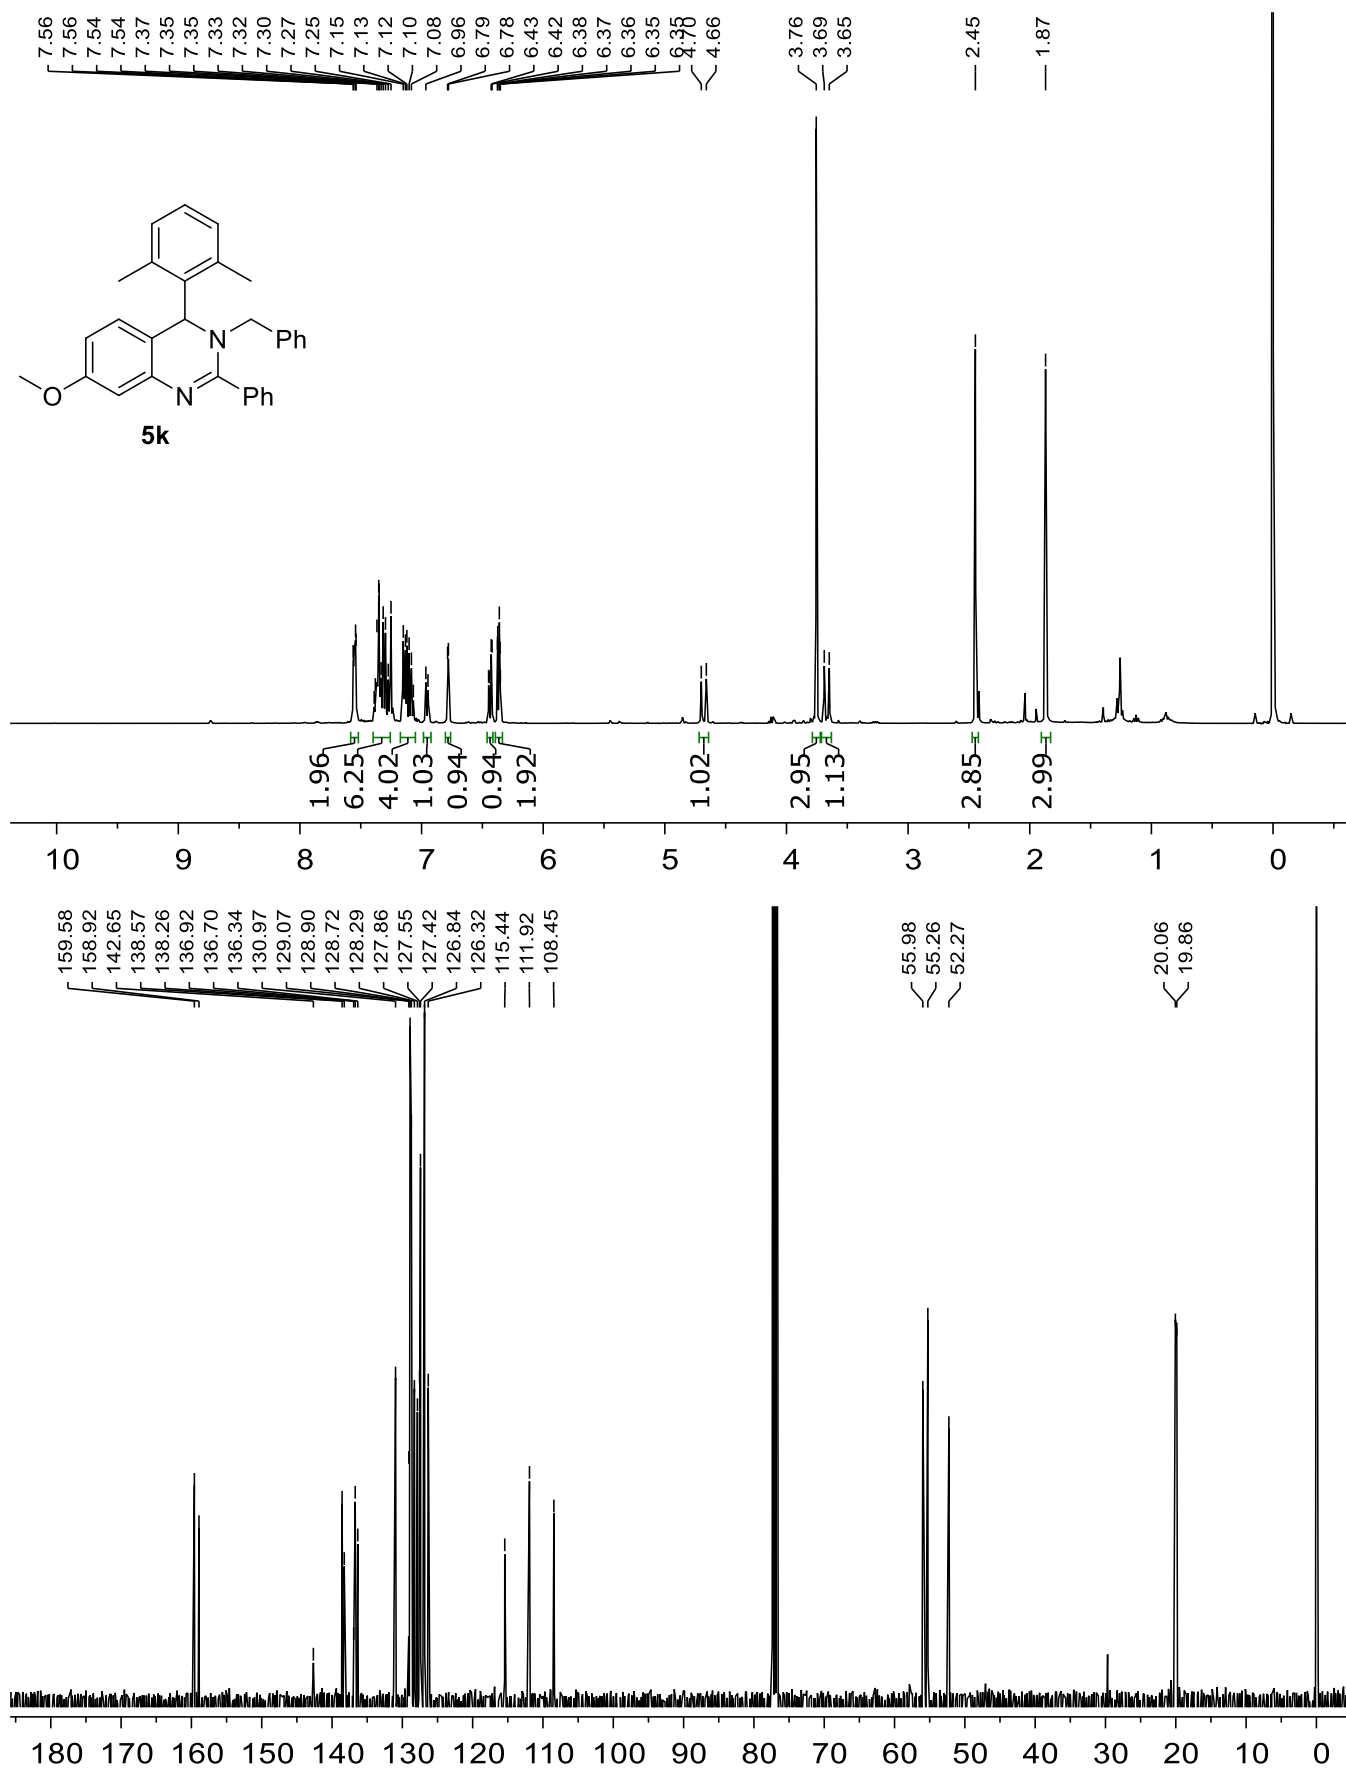

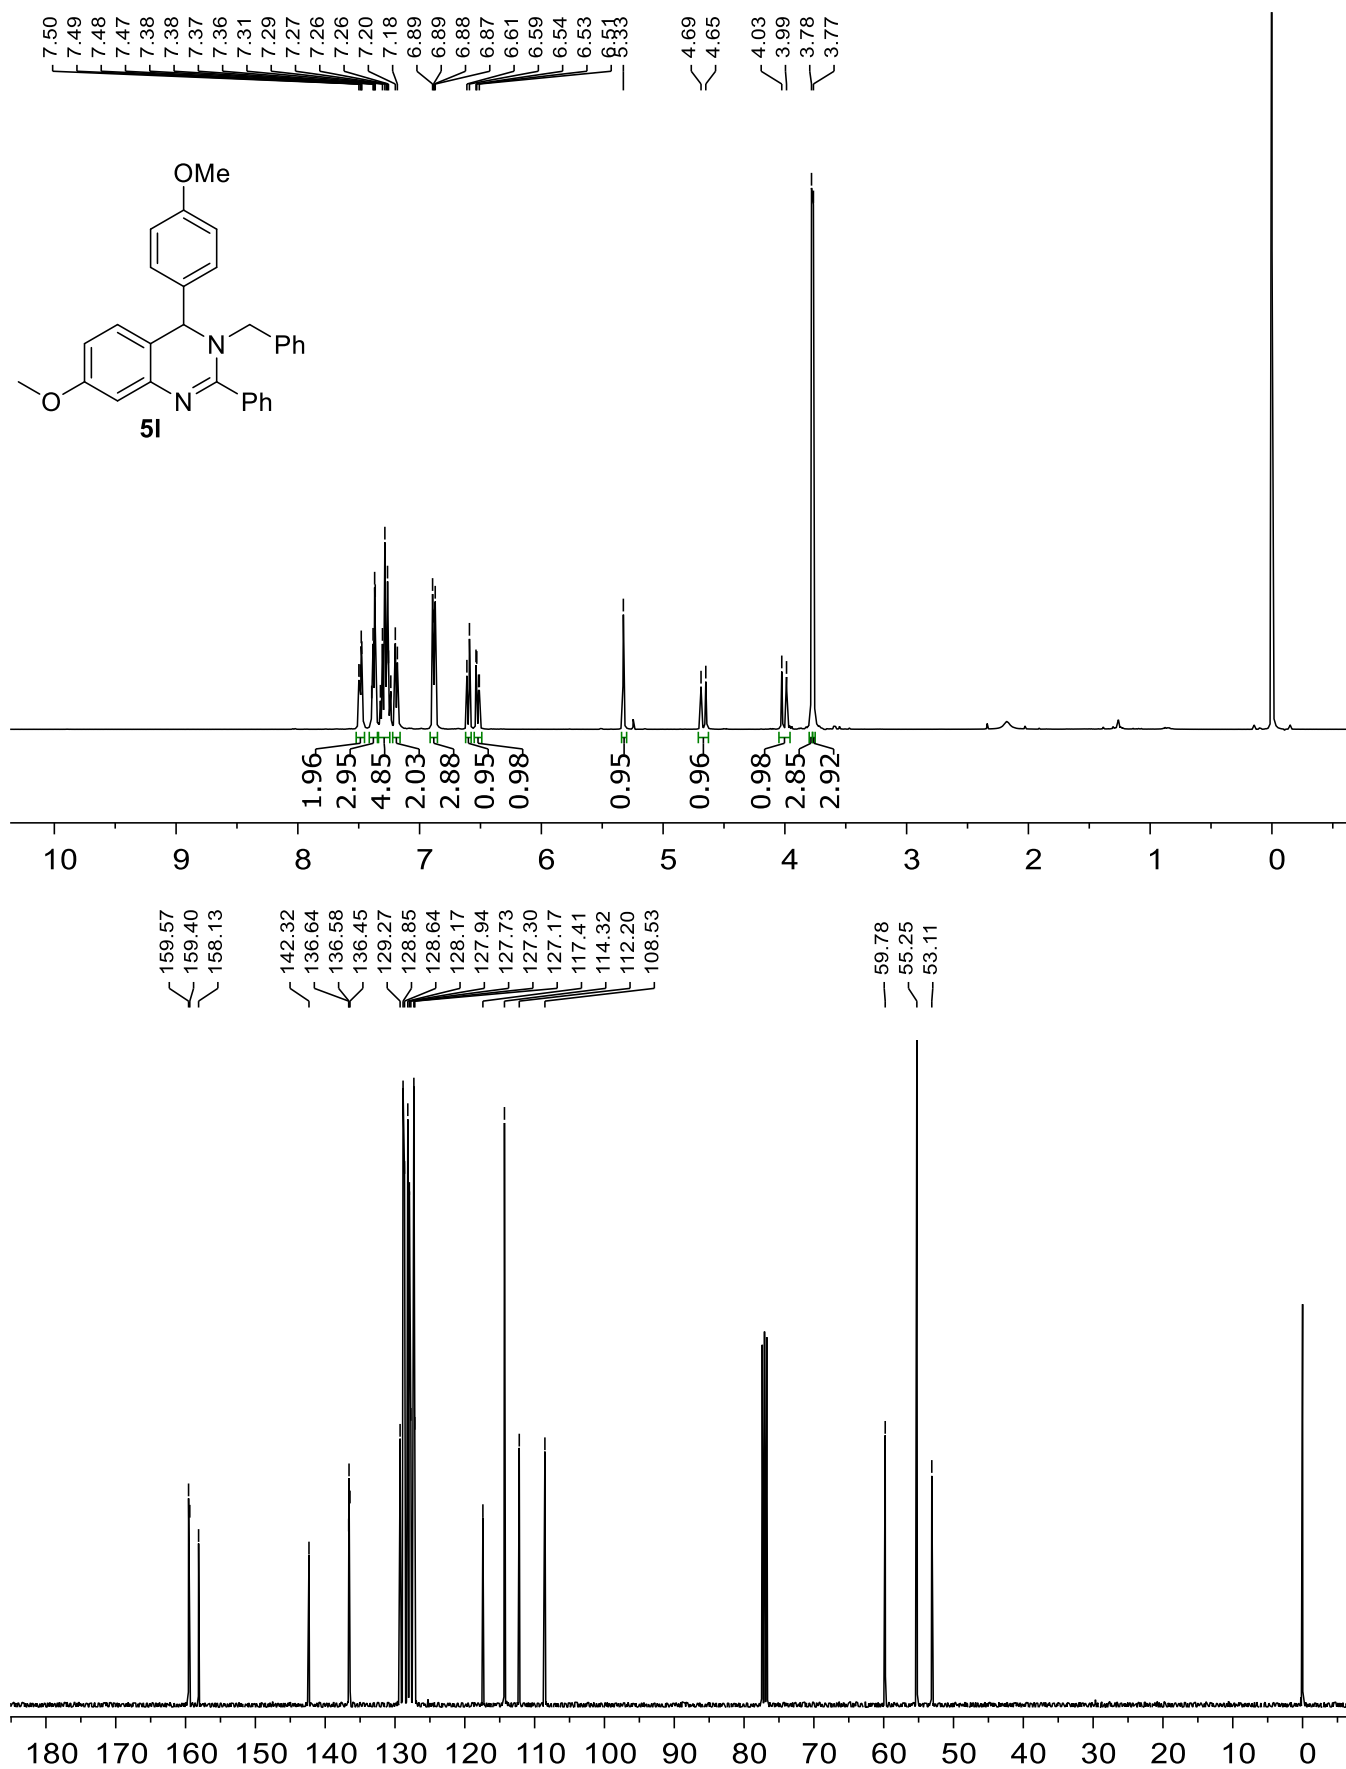

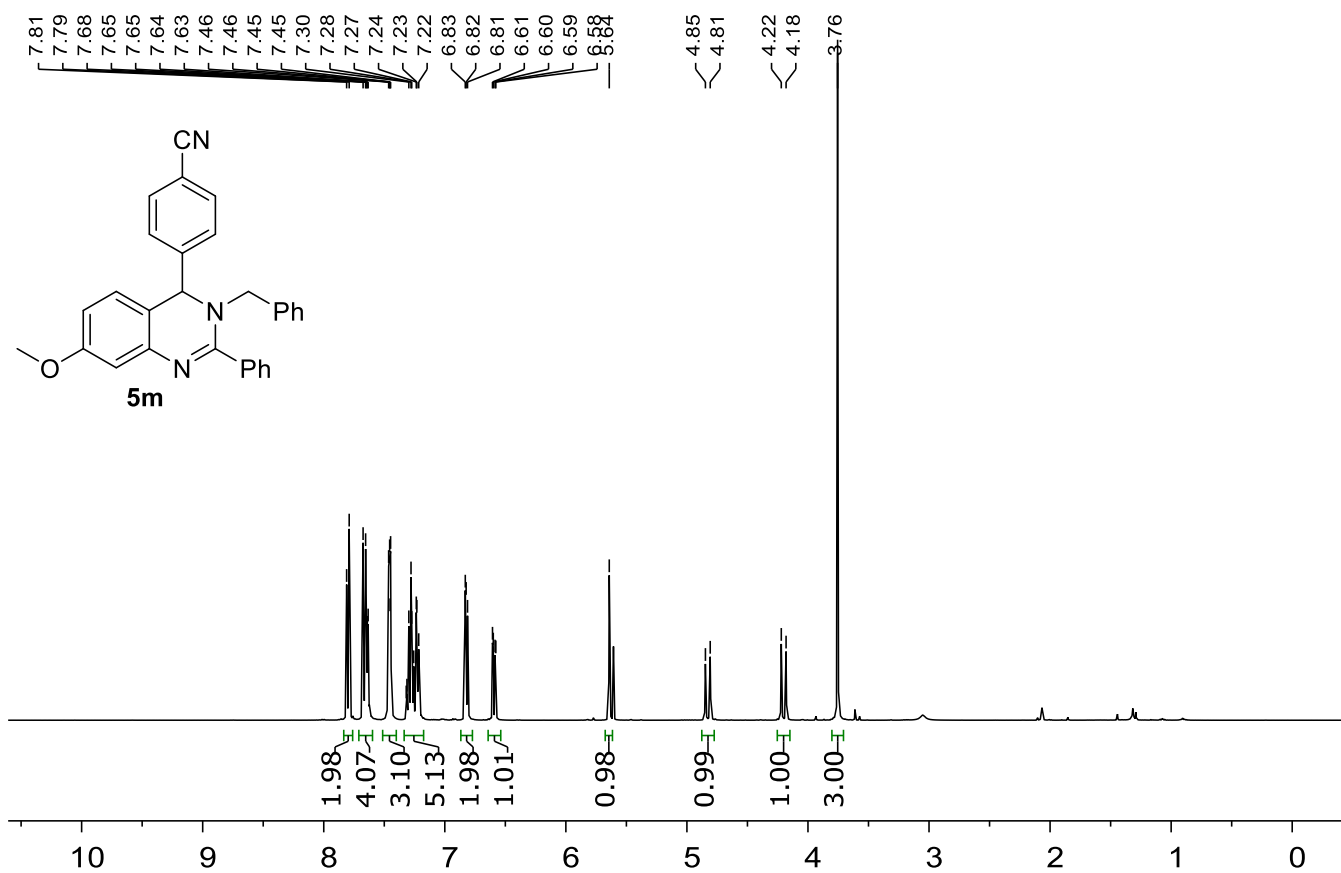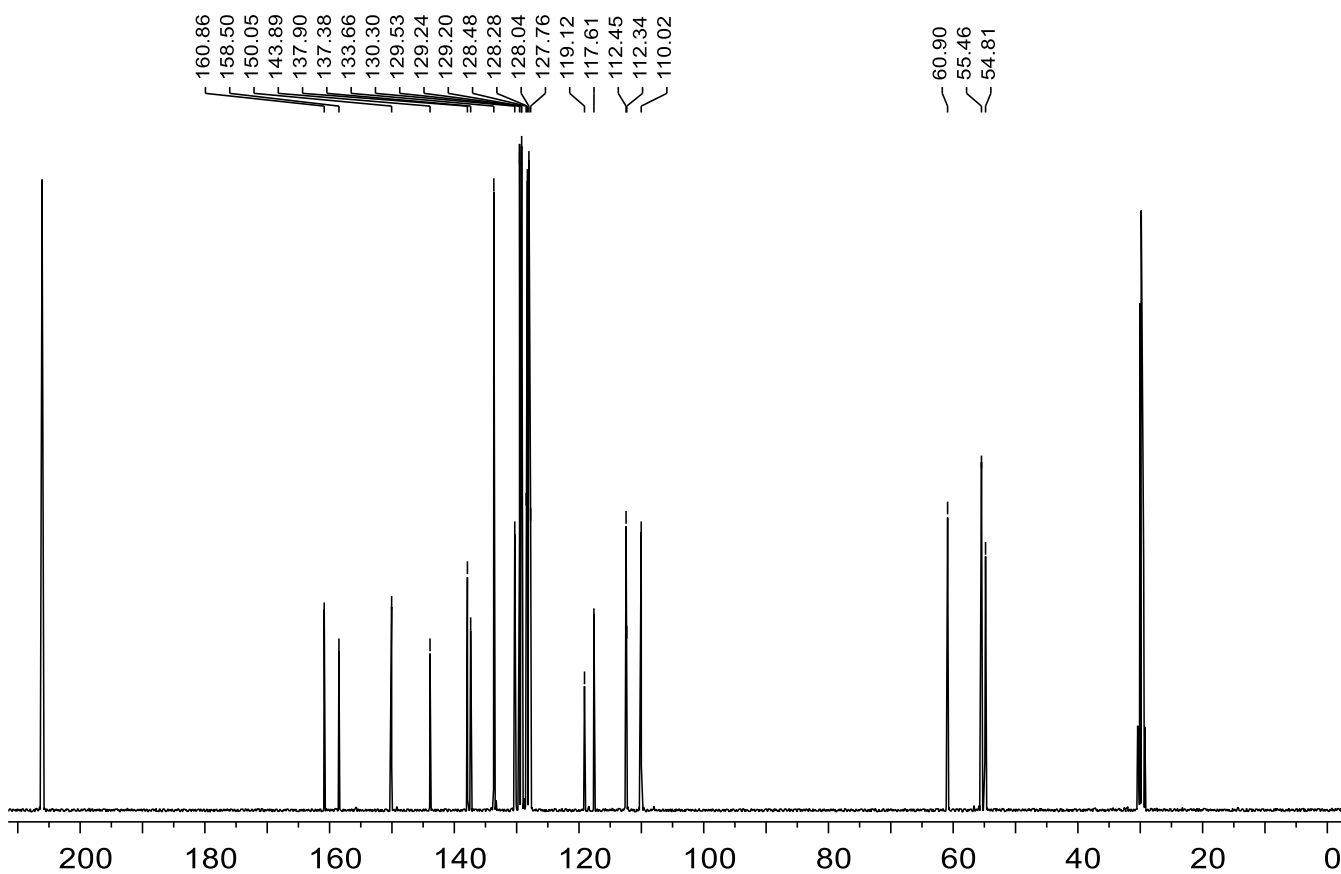

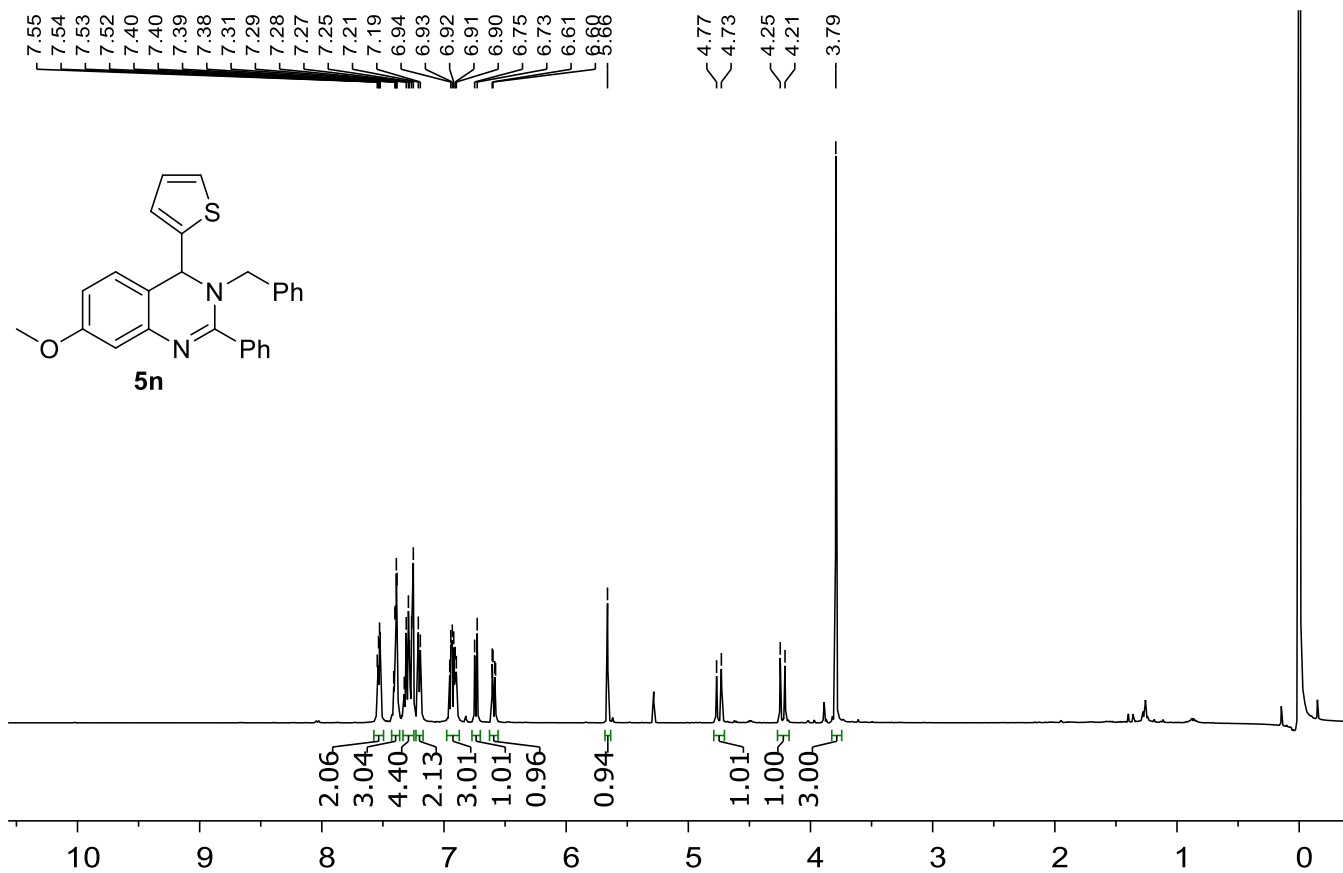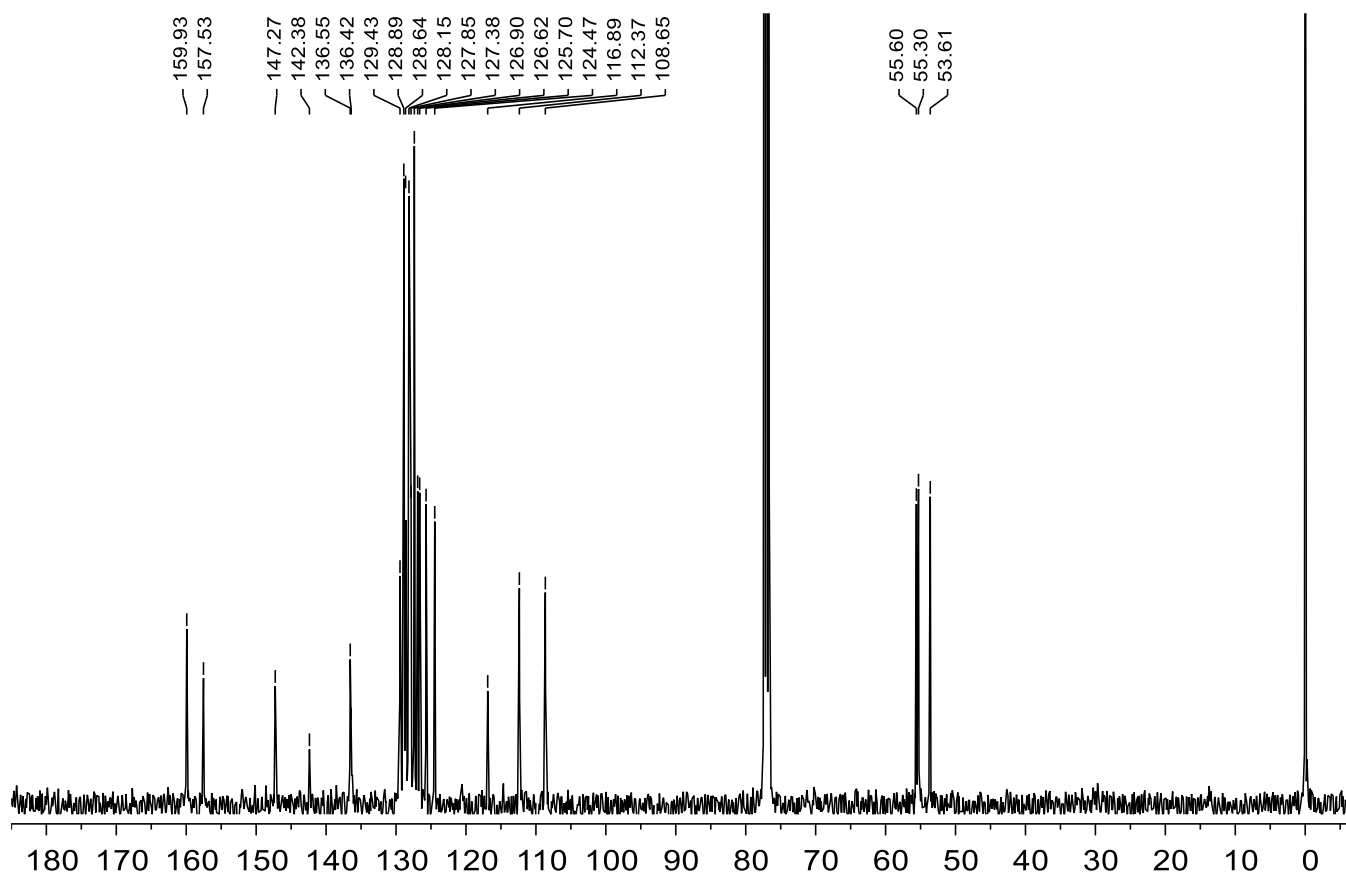

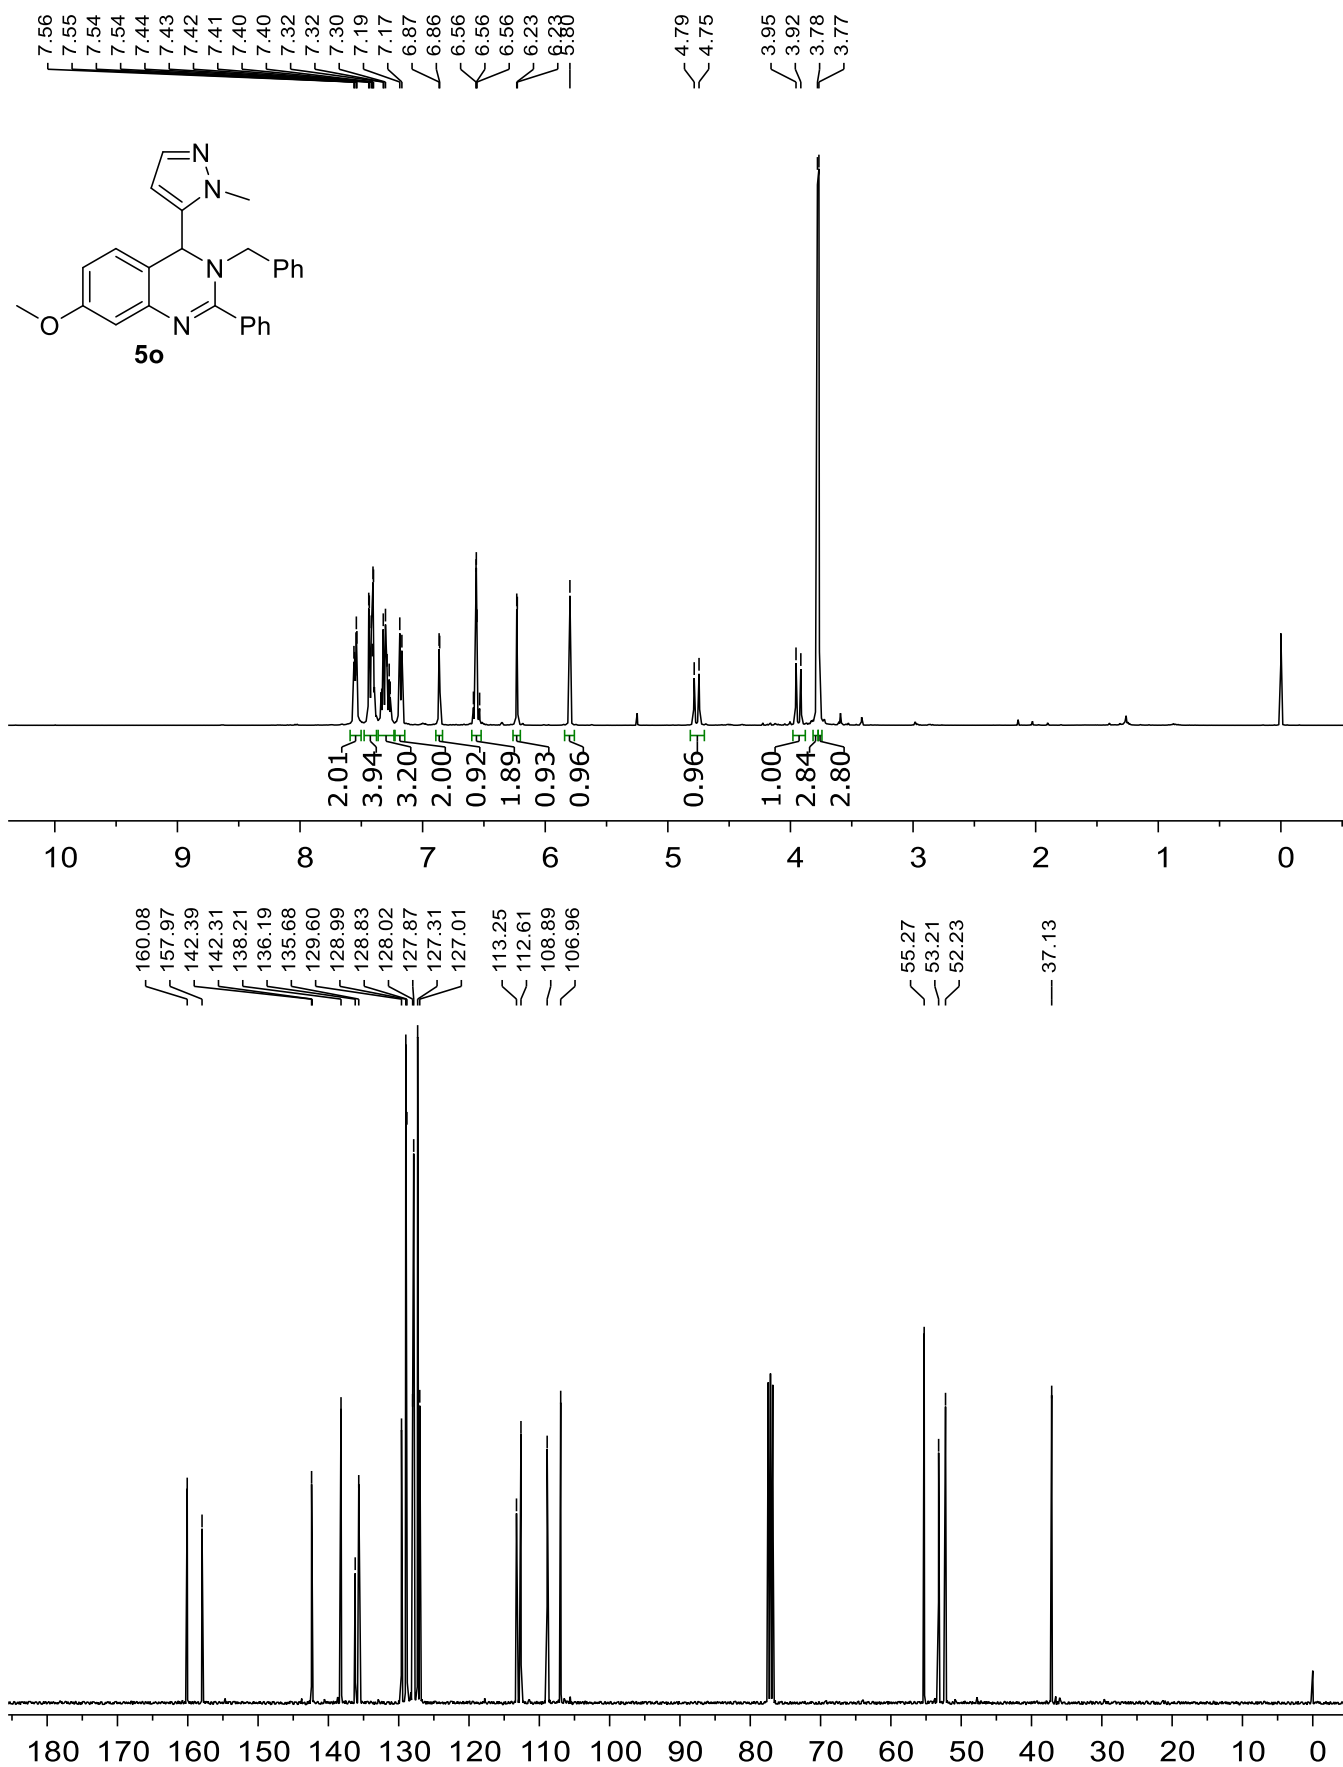

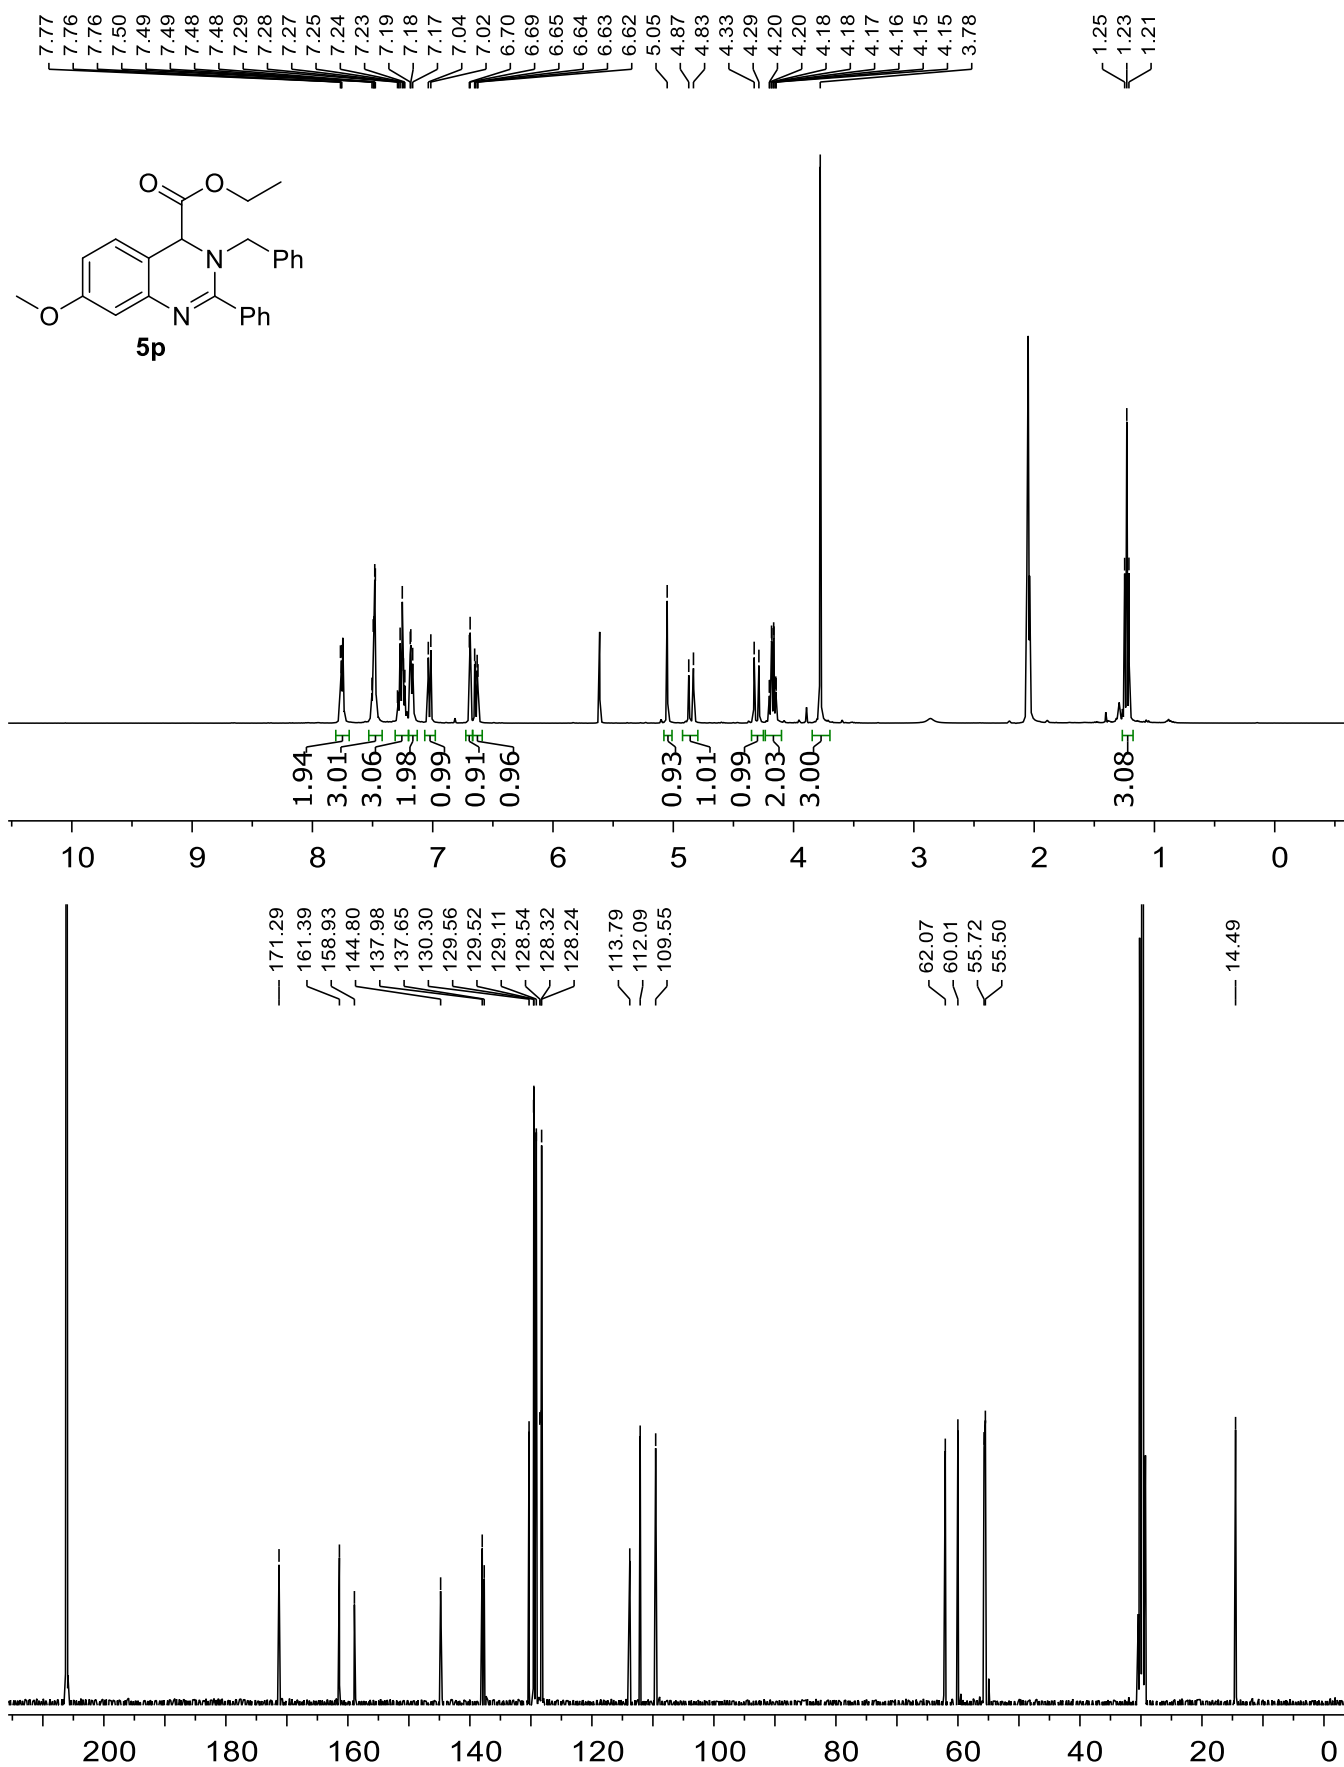

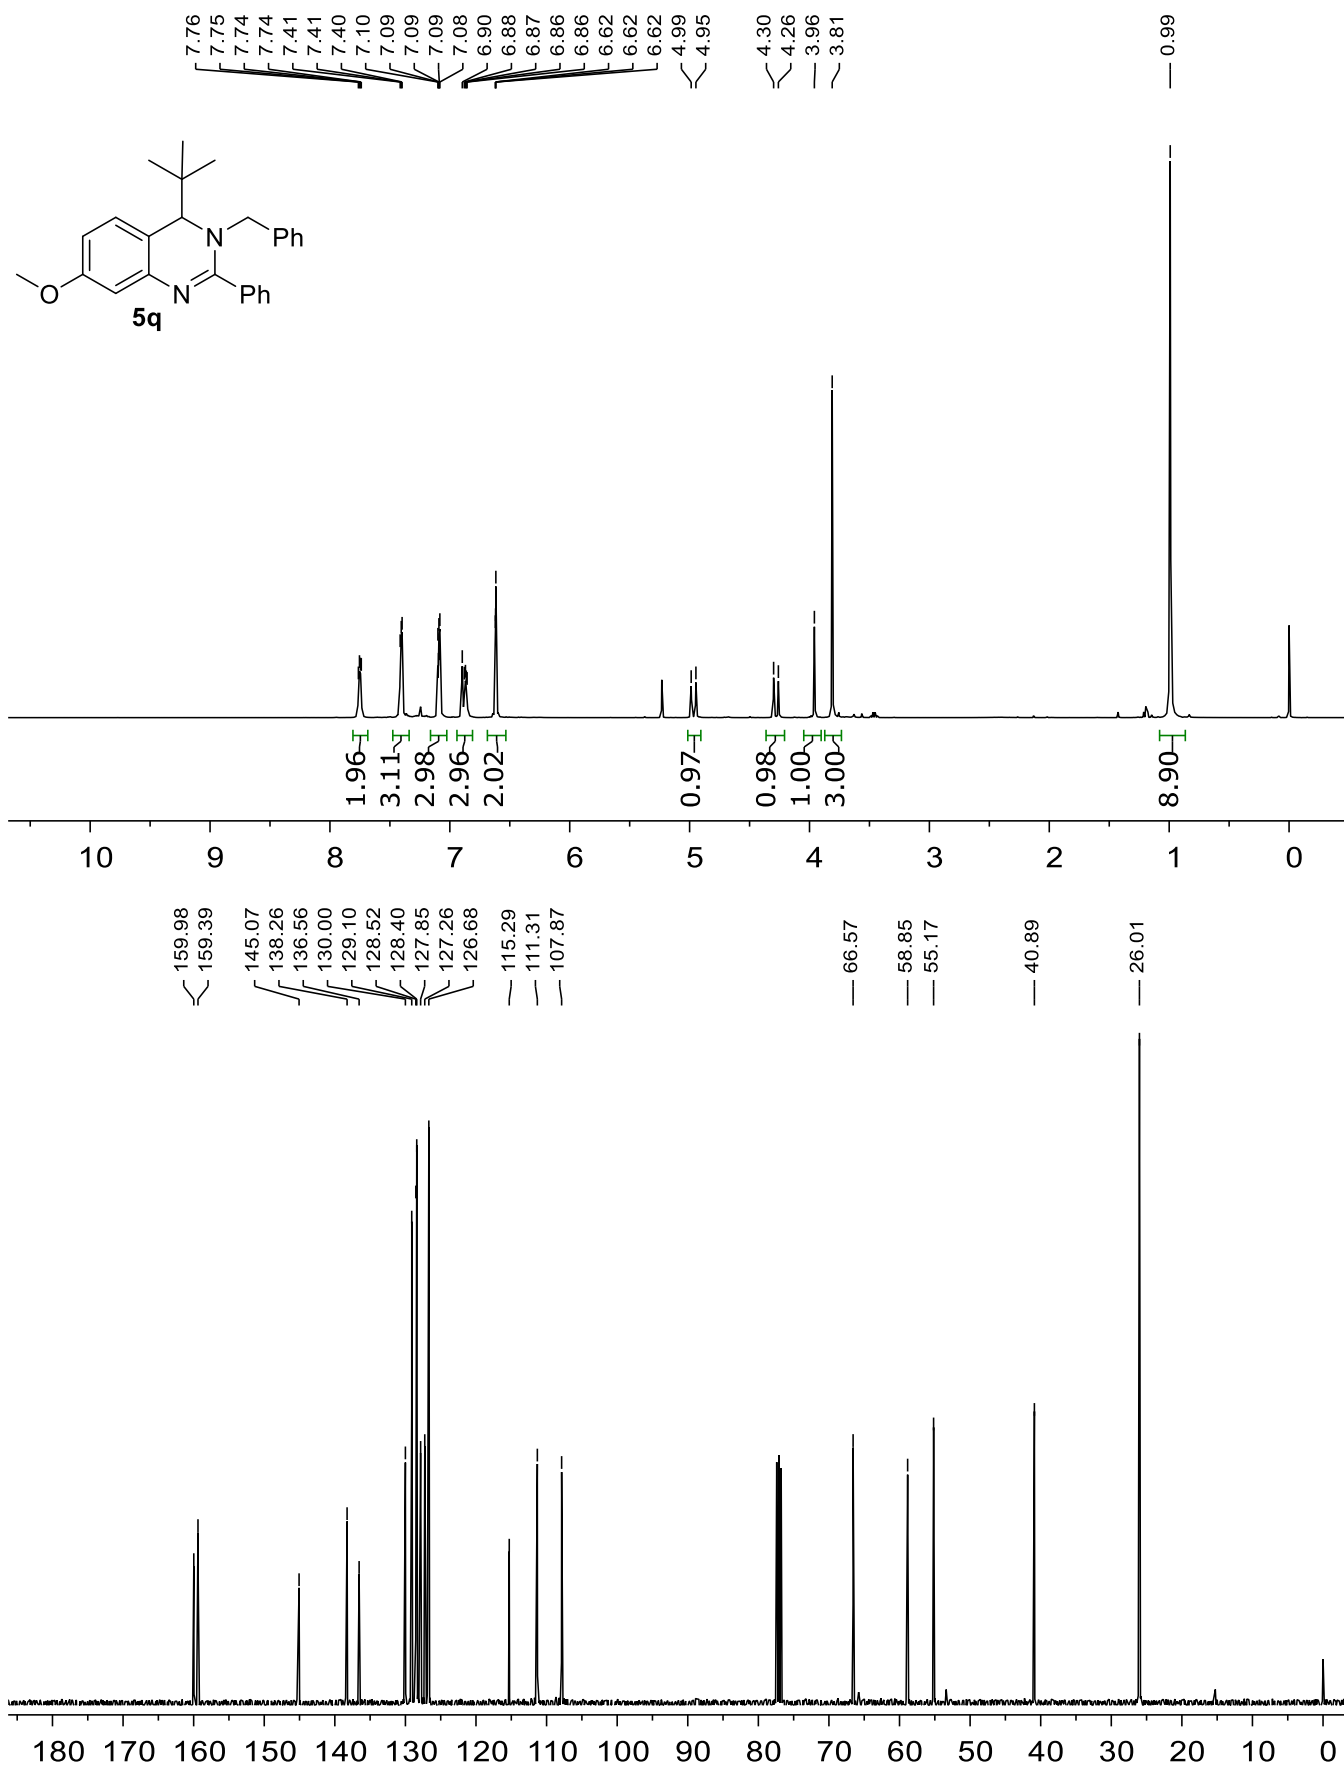

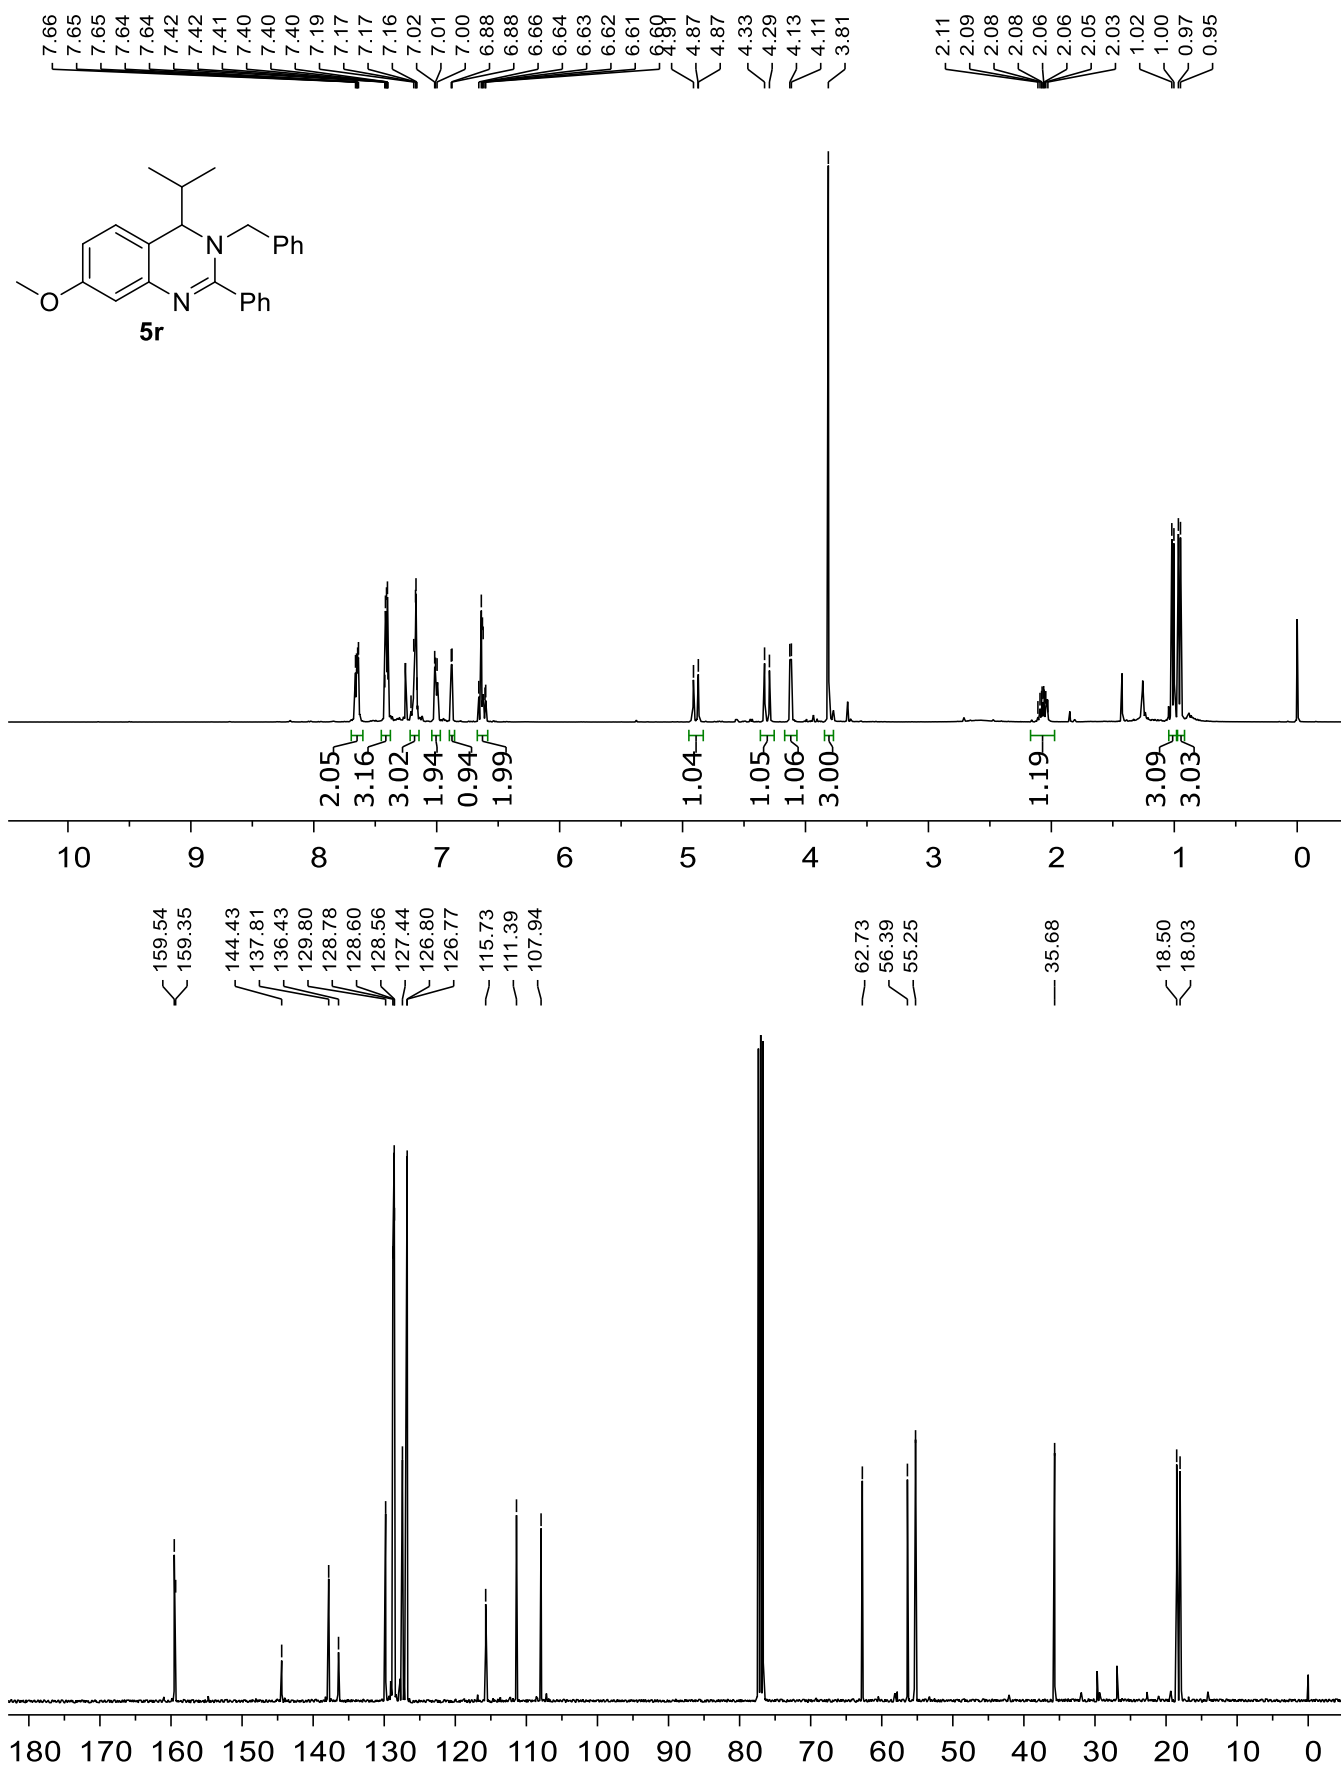

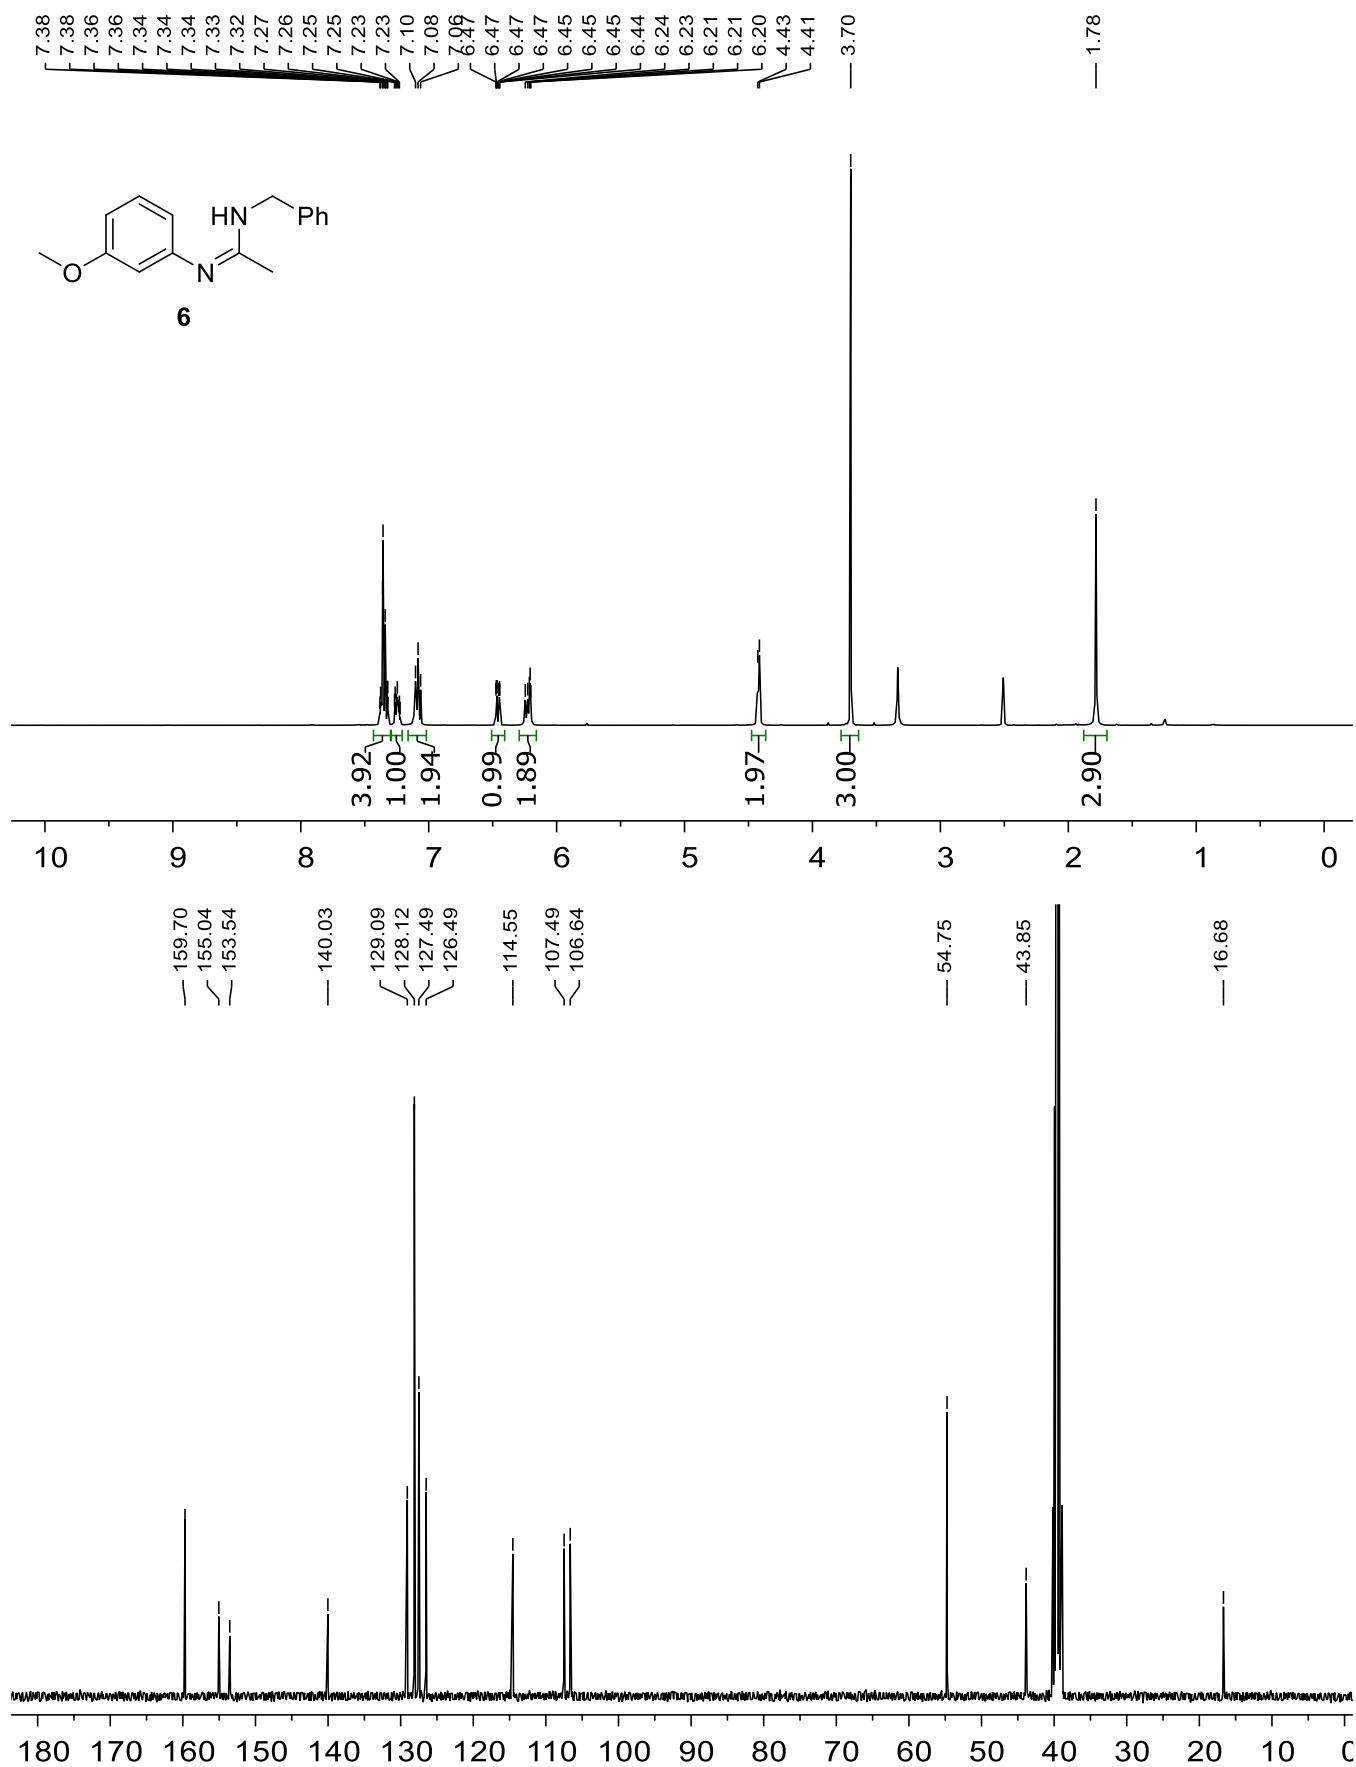

Supplement: c9ob01596e1.pdf [file c9ob01596e1.pdf]
